# Supplementary material for: Stable isotope and calcareous nannofossil assemblage record of the late Paleocene and early Eocene (Cicogna section)
Source: Copernicus journal article supplement (doi:10.5194/cp-12-883-2016), 2016-04-11
Supplement: Supplementary file 2 [file 20160314_TableS01_isotopes-carbonate.xlsx]

## Sheet: 13C-18O-CaCO3
Table S1. Bulk carbonate and oxygen stable isotopes and carbonate content of samples from the Cicogna section.
Sample ID	Height (m)	δ13C (‰)	δ18O (‰)	CaCO3 (%)
CIC/07-491	80.8	0.125064	-2.58216
CIC/07-488	80.2	-0.334419	-1.39906	69.7213
CIC/07-488	80.2	-0.315345	-1.40625	68.5728
CIC/07-485	79.6	-0.113156	-1.34079	52.7176
CIC/07-479	78.4	0.0500295	-1.3063	60.5767
CIC/07-476	77.8	-0.157955	-1.44875	66.4156
CIC/07-476	77.8	0.0772852	-1.43932	52.855
CIC/07-473	77.2	-0.176223	-1.29594	59.7931
CIC/07-470	76.6	0.149561	-1.71904	46.949
CIC/07-469	76.4	-0.106965	-1.42792	61.0566
CIC/07-468	76.4	-0.140019	-1.40263	59.4257
CIC/07-467	76.2	0.218127	-1.9572	44.7586
CIC/07-466	75.8	-0.265613	-1.1991	68.056
CIC/07-465	75.6	-0.177303	-1.32679	65.9275
CIC/07-464	75.4	-0.0364005	-1.44053	63.6114
CIC/07-463	75.2	-0.213505	-1.48982	66.0582
CIC/07-462	75	-0.00666988	-1.42291	59.3053
CIC/07-461	74.8	-0.351691	-1.35526	65.2046
CIC/07-460	74.6	-0.218186	-1.66047	46.6637
CIC/07-459	74.6	-0.158859	-1.46207	42.8061
CIC/07-458	74.2	0.202431	-1.63992	49.8642
CIC/07-457	74	0.631031	-1.39815	53.0358
CIC/07-455	73.6	0.0688156	-1.15329	67.5249
CIC/07-453	73.2	0.0661115	-1.48541	55.251
CIC/07-453	73.2	0.0376949	-1.55025	53.62
CIC/07-452	73	-0.105016	-1.50298	49.0499
CIC/07-451	72.8	-0.209355	-2.14167
CIC/07-450	72.6	-0.449348	-1.47647	46.997
CIC/07-449	72.4	0.138174	-1.91574
CIC/07-448	72.2	0.506347	-1.29764	36.7483
CIC/07-447	72	0.180569	-1.75459	37.2465
CIC/07-446	71.8	0.165102	-1.34989	55.5512
CIC/07-445	71.6	0.37904	-1.27636	59.8882
CIC/07-444	71.4	0.258102	-1.2539	58.5904
CIC/07-443	71.2	0.132661	-2.15797	38.0247
CIC/07-443	71.2	0.179092	-1.89193	41.6152
CIC/07-442	71	0.186337	-1.32907	56.4623
CIC/07-441	70.8	0.178674	-1.74032	37.8419
CIC/07-437	70	0.408911	-1.6044	55.655
CIC/07-435	69.6	0.352132	-1.59008	46.7473
CIC/07-434	69.4	0.213225	-1.57695	50.8746
CIC/07-431	68.8	0.350488	-1.54193	54.7769
CIC/07-428	68.2	0.503681	-1.42014	51.8677
CIC/07-427	68	0.440462	-1.44388	60.6303
CIC/07-426	67.8	0.370425	-1.40782	59.102
CIC/07-425	67.6	0.315737	-1.68641	47.0897
CIC/07-424	67.4	0.601987	-1.2211	55.3936
CIC/07-423	67.2	0.395357	-1.45776	54.8706
CIC/07-422	67	0.3407	-1.46165	53.8161
CIC/07-420	66.6			49.0017
CIC/07-419	66.4	0.296167	-1.43293	50.1557
CIC/07-418	66.2	0.325916	-1.39615	56.1685
CIC/07-417	66	0.452787	-1.56269	44.9196
CIC/07-416	65.8	0.372401	-1.79079	40.7578
CIC/07-415	65.6	0.471112	-1.76776	46.5182
CIC/07-414	65.4	0.598168	-1.46186	54.0415
CIC/07-413	65.2	0.626102	-1.36472	56.7437
CIC/07-412	65	0.470076	-1.51777	56.4586
CIC/07-411	64.8	0.672729	-1.53307	52.107
CIC/07-410	64.6	0.621615	-1.33906	61.3886
CIC/07-409	64.4	0.580586	-1.52552	44.9165
CIC/07-408	64.2	0.424387	-1.45476	61.1971
CIC/07-407	63.8			47.8345
CIC/07-406	63.6	0.632845	-1.3793	58.6693
CIC/07-405	63.6	1.90913	-2.03858	59.716
CIC/07-404	63.6	0.63485	-1.34107	53.9064
CIC/07-403	63.4	0.706691	-1.16403	63.0484
CIC/07-402	63.1	0.589988	-1.28721	63.6337
CIC/07-401	62.9	0.698894	-1.21215	62.2618
CIC/07-400	62.7	0.526935	-1.46217	56.0729
CIC/07-399	62.5	0.517023	-1.45081	63.7143
CIC/07-399	62.5			59.0678
CIC/07-398	62.3	0.703556	-1.08159	68.3573
CIC/07-397	62.1	0.489108	-1.43421	60.1545
CIC/07-396	61.9	0.550941	-1.26011	63.614
CIC/07-395	61.7	0.576241	-1.38749	44.2303
CIC/07-394	61.5	0.359834	-1.56496	48.3873
CIC/07-394	61.5			44.9206
CIC/07-393	61.3	0.214954	-1.65826	52.1554
CIC/07-393	61.3			44.5703
CIC/07-392	61.1	0.528759	-1.71175	32.5477
CIC/07-391	60.9	0.389097	-1.41649	59.4974
CIC/07-390	60.7	0.438319	-1.39945	61.4985
CIC/07-390	60.7	0.488348	-1.34432	42.0669
CIC/07-389	60.5	0.546281	-1.4278	55.4835
CIC/07-388	60.3	0.629246	-1.3796	68.67
CIC/07-388	60.3			65.04
CIC/07-387	60.1	0.766947	-1.21188	66.9461
CIC/07-386	59.9	0.580183	-1.53652	54.6069
CIC/07-385	59.7	0.675561	-1.33551	63.1619
CIC/07-384	59.5	0.595872	-1.62043	57.4525
CIC/07-383	59.3	0.836651	-1.33768	64.7068
CIC/07-382	59.1	0.791104	-1.16052	56.4996
CIC/07-381	58.9	0.661828	-1.74834	56.9559
CIC/07-380	58.7	0.701923	-1.34393	61.5913
CIC/07-378	58.3	0.68215	-1.35637	59.6379
CIC/07-377	58.1	0.614173	-1.35769	57.1622
CIC/07-376	57.9	0.605588	-1.43804	60.2588
CIC/07-375	57.7	0.635615	-1.36211	62.699
CIC/07-374	57.5	0.596327	-1.44168	57.5301
CIC/07-373	57.3	0.592656	-1.3656	65.7861
CIC/07-373	57.3	0.400919	-1.91481	46.2625
CIC/07-372	57.1	0.627571	-1.25869	57.1297
CIC/07-371	56.9	0.376965	-1.59571	49.6461
CIC/07-370	56.7	0.38356	-1.50643	50.6203
CIC/07-369	56.5	0.202506	-1.85954	39.4444
CIC/07-368	56.3	0.387436	-1.54543	53.7977
CIC/07-367	56.1	0.308946	-1.85522	49.6097
CIC/07-366	55.9	0.532294	-1.72264	48.1929
CIC/07-365	55.7	0.431477	-1.57913	52.7921
CIC/07-365	55.7	0.476499	-1.76166	47.5594
CIC/07-365	55.7	0.404374	-1.64375	53.7465
CIC/07-364	55.5	0.537858	-1.52135	50.6572
CIC/07-363	55.2	0.453359	-1.35254	57.6067
CIC/07-362	55.1	0.00719778	-2.18854	77.6966
CIC/07-361	55.1	0.291142	-1.73235	36.1382
CIC/07-360	55	0.148516	-1.74051	45.0246
CIC/07-359	54.9	0.203781	-1.45451	53.0145
CIC/07-358	54.8	-0.422991	-2.91098
CIC/07-357	54.7	-0.118688	-1.96272	41.2296
CIC/07-357	54.7			52.9289
CIC/07-356	54.6	-0.0691761	-1.94432	37.8267
CIC/07-355	54.5	-0.403399	-2.78754	62.9086
CIC/07-354	54.4	-0.506955	-3.2112
CIC/07-353	54.3	0.145721	-2.29366
CIC/07-352	54.2	0.193931	-2.01563	41.9314
CIC/07-351	54.1	0.474025	-1.47392	57.2297
CIC/07-349	54	0.350369	-1.86265	42.8264
CIC/07-350	53.9	0.326374	-1.64315	52.9202
CIC/07-348	53.8	0.61257	-1.57187	52.3651
CIC/07-347	53.6	0.550293	-1.74566	52.0159
CIC/07-346	53.4	0.711035	-1.30691	62.0384
CIC/07-345	53.2	0.593193	-1.66107	59.9798
CIC/07-344	53	0.510208	-1.56851	51.9905
CIC/07-343	52.8	0.352422	-1.93126	44.6284
CIC/07-342	52.6	0.565837	-1.49442	52.9504
CIC/07-341	52.4	0.622999	-1.65235	46.065
CIC/07-340	52.2	0.676393	-1.59757	50.9891
CIC/07-339	52	0.692923	-1.48304	57.8912
CIC/07-338	51.8	0.573146	-1.73177	49.0508
CIC/07-336	51.4	0.606325	-1.71647	50.2655
CIC/07-335	51.2	0.69393	-1.66318	52.4898
CIC/07-334	51	0.750051	-1.47705	56.3494
CIC/07-333	50.8			56.0506
CIC/07-332	50.6	0.782077	-1.51603	53.7561
CIC/07-331	50.4	0.727001	-1.56712	55.5163
CIC/07-330	50.2	0.637032	-1.71503	44.1998
CIC/07-329	50	0.655742	-1.66477	51.5355
CIC/07-328	49.8	0.503007	-2.05543	54.5986
CIC/07-327	49.6	0.742563	-1.58051	54.3539
CIC/07-327	49.6	0.737625	-1.72701	52.5951
CIC/07-325	49.2			55.2951
CIC/07-323	48.8	0.694912	-1.81564	55.9562
CIC/07-322	48.6			56.9655
CIC/07-321	48.4	0.708656	-1.64178	54.6473
CIC/07-320	48.2	0.710796	-1.75487	53.5958
CIC/07-319	48	0.690952	-1.78948	50.4817
CIC/07-318	47.8	0.775765	-1.66464	46.0585
CIC/07-317	47.6	0.909056	-1.55212	53.9096
CIC/07-316	47.6	0.763051	-1.88146	51.138
CIC/07-315	47.2	0.752366	-1.9142	54.5508
CIC/07-314	47	0.980258	-1.4513	62.0967
CIC/07-313	46.8	0.923962	-1.39969	59.1171
CIC/07-312	46.6	0.898333	-1.82723	40.5688
CIC/07-311	46.4	1.00676	-1.63135	54.4321
CIC/07-310	46.2	0.968769	-1.71702	45.4631
CIC/07-309	46	0.961081	-1.66636	54.2948
CIC/07-308	45.8	1.01657	-1.53203	53.9908
CIC/07-307	45.6			48.5386
CIC/07-306	45.4			51.2933
CIC/07-305	45.2	0.968777	-1.49517	56.2548
CIC/07-305	45.2	0.972512	-1.569	54.1211
CIC/07-304	45	0.88531	-1.72983	49.5168
CIC/07-303	44.8	0.941826	-1.49305	54.0537
CIC/07-302	44.6	0.864012	-1.83288	53.9075
CIC/07-301	44.4	0.858525	-1.67905	49.7943
CIC/07-300	44.2	0.95865	-1.47493	53.5288
CIC/07-299	44	0.923592	-1.73578	51.8229
CIC/07-298	43.8	0.877785	-1.46988	49.5725
CIC/07-297	43.6	0.94378	-1.67441	53.4335
CIC/07-296	43.4	0.910094	-1.64002	53.2827
CIC/07-295	43.2	0.844695	-1.51998	53.7822
CIC/07-294	42.85	0.755517	-1.82258	52.8192
CIC/07-292	42.8	0.947975	-1.6149	50.1246
CIC/07-291	42.6			41.1156
CIC/07-290	42.4	0.812722	-1.97777	48.457
CIC/07-287	41.8	1.00908	-1.75645	49.7954
CIC/07-286	41.6	0.879813	-1.67542	48.2806
CIC/07-285	41.45	0.926481	-1.66363	48.1166
CIC/07-284	41.4	1.12202	-1.72999	52.2413
CIC/07-283	41.2	1.04401	-1.65316	48.0058
CIC/07-282	41	1.14386	-1.6719	56.827
CIC/07-281	40.8	0.936415	-2.53874	44.4298
CIC/07-280	40.6	0.925279	-3.18966	34.9879
CIC/07-279	40.4	0.909747	-2.52658	49.8307
CIC/07-278	40.2	0.83932	-2.78347	48.5705
CIC/07-277	40	0.950398	-2.45753	52.0247
CIC/07-276	39.8	0.90276	-2.96067	55.5303
CIC/07-275	39.6	0.943021	-1.72305	56.5925
CIC/07-273	39.35	0.968304	-1.73037	56.3902
CIC/07-272	39.25	1.01949	-1.45379	62.2516
CIC/07-271	39.18	0.864299	-1.79483	52.4113
CIC/07-270	39.09	0.879141	-1.61181	58.8832
CIC/07-268	38.97	0.846454	-1.61238	71.9405
CIC/07-267	38.9	0.641801	-2.0299	47.6009
CIC/07-266	38.82	1.04747	-1.4599
CIC/07-265	38.74	0.893716	-1.79519	51.5205
CIC/07-264	38.65	0.771762	-1.80221	53.7027
CIC/07-264	38.65	1.05804	-1.65617	56.4663
CIC/07-263	38.54	0.749295	-1.96363	49.552
CIC/07-262	38.47	0.960121	-1.54273	75.9829
CIC/07-261	38.35	0.782563	-1.90505	50.3564
CIC/07-260	38.25	0.930868	-1.54536
CIC/07-259	38.15	0.852954	-1.93209	47.3999
CIC/07-258	38.06	1.01712	-1.67623	61.204
CIC/07-257	38.02	1.04642	-1.77249	58.5436
CIC/07-256	37.88	1.03526	-1.71946	60.2639
CIC/07-255	37.83	0.907131	-1.88308	55.5781
CIC/07-254	37.78	0.962698	-1.87783	57.7594
CIC/07-253	37.73	0.963456	-1.86026	57.3663
CIC/07-252	37.6	0.99878	-1.6417	70.1657
CIC/07-251	37.53	0.752719	-2.34238	56.24
CIC/07-250	37.46	0.903894	-1.7527	72.6911
CIC/07-249	37.28	0.312928	-2.73388	50.6605
CIC/07-248	37.2	0.958183	-1.48471	69.4751
CIC/07-247	37.09	0.797821	-1.95111	57.9355
CIC/07-246	36.96	0.875994	-1.61361	61.3536
CIC/07-245	36.84	0.867627	-1.98116	61.7435
CIC/07-244	36.79	0.977849	-1.69786	66.1321
CIC/07-243	36.62	0.907375	-1.93862	55.352
CIC/07-242	36.48	0.846542	-1.92652	63.5893
CIC/07-241	36.42	0.604531	-2.36356	52.5403
CIC/07-240	36.34	0.900271	-1.67167	66.7857
CIC/07-239	36.2	0.494801	-2.69372	50.7249
CIC/07-238	36.13	0.837053	-2.01887	58.1337
CIC/07-237	35.97	0.845729	-2.13069	58.2028
CIC/07-237	35.97	0.833146	-2.10339	57.2369
CIC/07-236	35.83	0.187976	-2.58681	45.118
CIC/07-235	35.77	0.361509	-2.71044	44.3075
CIC/07-234	35.7	0.898128	-1.87378	64.5253
CIC/07-233	35.52	0.63886	-2.47158	51.2842
CIC/07-232	35.35	0.708832	-2.16515	69.3259
CIC/07-231	35.27	0.29561	-2.93621	41.1922
CIC/07-229	35.07	0.3359	-3.01826	44.3924
CIC/07-228	35.02	0.914	-1.58357
CIC/07-230	35.02	0.917896	-1.70314	67.5574
CIC/07-227	34.76	0.496387	-2.757	52.6355
CIC/07-226	34.72	0.966204	-1.96071	70.4302
CIC/07-225	34.6	0.851161	-1.94048	58.0661
CIC/07-224	34.4	0.914744	-1.63199
CIC/07-223	34.17	0.530466	-2.72579	48.9683
CIC/07-222	34.03	0.856964	-1.81985	65.0208
CIC/07-221	33.92	0.36064	-2.89274	47.8276
CIC/07-220	33.82	0.740496	-1.6953	66.208
CIC/07-219	33.72	0.18509	-2.98263	45.4478
CIC/07-218	33.6	0.814226	-1.72548
CIC/07-217	33.48	0.572333	-2.46433	62.4697
CIC/07-216	33.42	0.741156	-2.38887	57.139
CIC/07-215	33.32	0.707002	-2.2943	55.3937
CIC/07-214	33.22	0.841057	-2.08054	67.3815
CIC/07-213	33.12	0.454439	-2.63113	53.1912
CIC/07-212	33.08	0.763455	-1.79696	69.4373
CIC/07-211	33	0.652183	-1.82596	64.5755
CIC/07-210	32.93	0.409781	-2.47652	57.3429
CIC/07-209	32.75	0.475967	-2.22571	62.2343
CIC/07-208	32.65	0.170595	-2.79624	50.5165
CIC/07-207	32.55	0.555028	-1.91687
CIC/07-206	32.43	0.401252	-1.98734	62.5679
CIC/07-205	32.31	0.669082	-1.73429
CIC/07-204	32.31	0.132226	-2.78814	49.5143
CIC/07-203	32.24	0.477662	-1.97498
CIC/07-202	32.08	0.287517	-2.22605	61.0458
CIC/07-201	32.03	0.0119724	-2.77304	49.2896
CIC/07-200	31.92	0.357622	-1.69995	65.8568
CIC/07-199	31.8	-0.218908	-2.67404	49.6102
CIC/07-198	31.7	-0.0590583	-2.41943	56.5423
CIC/07-197	31.6	-0.0348181	-2.23995	54.4239
CIC/07-196	31.5	-0.0377463	-2.04598	59.478
CIC/07-195	31.4	-0.6581	-2.97272	37.6154
CIC/07-194	31.3	-0.683176	-3.06071	34.891
CIC/07-193	31.2	-0.69999	-2.94916	32.9927
CIC/07-192	31.1	-0.408605	-2.57434	50.262
CIC/07-191	31	-0.419039	-2.47449	42.7586
CIC/07-190	30.9	-0.468954	-2.84292	37.272
CIC/07-189	30.8	-0.106077	-1.98737	57.1481
CIC/07-188	30.7	-0.611676	-2.79133	36.7482
CIC/07-187	30.6	-0.867166	-3.30157
CIC/07-186	30.5	-0.538768	-3.08453	42.5555
CIC/07-185	30.4	-0.412637	-2.55067	40.5213
CIC/07-184	30.3	-0.256356	-2.33238	59.104
CIC/07-183	30.2	-0.744807	-3.17168
CIC/07-182	30.1	-0.441865	-2.7265	39.1289
CIC/07-181	30	-0.494071	-2.61296	36.7187
CIC/07-180	29.9	-0.503231	-2.59221	40.326
CIC/07-179	29.8	-0.769118	-3.36771
CIC/07-178	29.7	-0.643918	-2.65267	37.5534
CIC/07-177	29.6	-0.786146	-3.05112	31.1537
CIC/07-176	29.5	-0.761112	-3.36127
CIC/07-175	29.4	-0.504899	-2.74667
CIC/07-174	29.3	-0.58425	-2.63449	34.1111
CIC/07-173	29.25	-0.578788	-2.65208	35.0572
CIC/07-172	29.2	-0.811659	-3.37227
CIC/07-171	29.15	-0.600022	-2.66683
CIC/07-170	29.1	-0.523049	-2.7847
CIC/07-169	29.05	-0.882748	-3.16989
CIC/07-168	29	-0.828207	-3.27976
CIC/07-167	28.95	-1.21342	-3.64156	50.9965
CIC/07-166	28.9	-1.18783	-3.26597	45.1751
CIC/07-165	28.85	-0.155673	-1.28704
CIC/07-164	28.8	-0.0449197	-3.63914
CIC/07-163	28.75	0.140587	-1.75971	9.38625
CIC/07-162	28.7	-0.210124	-3.41158	46.8658
CIC/07-161	28.6	0.737124	-2.38827	54.1959
CIC/07-160	28.4	0.183036	-3.38771	38.9275
CIC/07-159	28.2	0.750731	-2.22544	65.2736
CIC/07-158	28	1.23968	-2.14022	50.392
CIC/07-157	27.8	1.19895	-1.85051	54.7783
CIC/07-156	27.6	0.973163	-2.52212	44.4351
CIC/07-155	27.4	1.10912	-2.05845	53.239
CIC/07-154	27.2	0.622714	-2.48516	43.6546
CIC/07-153	27	0.673812	-2.18436	54.0265
CIC/07-153	27	0.622699	-2.04802	52.4136
CIC/07-152	26.8	0.896296	-2.23339	50.3143
CIC/07-151	26.6	1.21858	-2.06905	54.8635
CIC/07-150	26.4	1.00347	-2.01107	55.7722
CIC/07-149	26.2	1.4299	-1.82517	54.9763
CIC/07-148	26	1.14439	-2.37919	56.0757
CIC/07-147	25.8	1.40489	-1.80736	62.1713
CIC/07-146	25.6	1.18125	-2.11458	64.2854
CIC/07-145	25.4	1.30093	-2.15319	55.6344
CIC/07-144	25.2	1.00606	-2.58566	44.4931
CIC/07-143	25	1.45996	-1.90819	57.0664
CIC/07-142	24.8			52.2639
CIC/07-141	24.6	1.45121	-2.1898	51.2452
CIC/07-140	24.4	1.67194	-1.86598	57.0788
CIC/07-139	24.2	1.55643	-2.10544	52.8699
CIC/07-138	24	1.81675	-1.83564	60.4142
CIC/07-137	23.8	1.67543	-2.04501	55.749
CIC/07-136	23.6	1.73646	-1.68776	64.398
CIC/07-135	23.4	1.79551	-1.90584	58.637
CIC/07-134	23.2	1.86978	-1.8092	54.0843
CIC/07-133	23	1.84294	-1.81265	58.4275
CIC/07-132	22.8	1.78547	-1.7281	60.5842
CIC/07-131	22.6	1.77552	-1.74004	60.9992
CIC/07-130	22.4	1.64423	-2.04762	60.4977
CIC/07-129	22.3	1.56097	-2.03713	59.3668
CIC/07-128	22.22	1.32995	-1.99957	59.4537
CIC/07-127	22	1.64545	-1.90274	60.6959
CIC/07-126	21.8	1.6077	-2.13318	57.6026
CIC/07-125	21.6	1.48404	-2.32446	51.2397
CIC/07-124	21.4	1.56538	-1.79461	50.392
CIC/07-123	21.2	1.58726	-1.79205	61.3322
CIC/07-122	20.99	1.45699	-1.87231	57.0628
CIC/07-121	20.8	1.50219	-1.83261	51.8414
CIC/07-120	20.64	1.45008	-1.92973	59.0137
CIC/07-119	20.55	1.31378	-2.50583	52.8331
CIC/07-118	20.5	1.55256	-1.86632	62.771
CIC/07-117	20.43	1.26167	-2.45766	53.6509
CIC/07-116	20.38	1.37083	-2.35678	58.0937
CIC/07-115	20.29	1.04493	-2.78994	43.3604
CIC/07-114	20.2	1.70968	-1.71963	56.1916
CIC/07-113	20	1.78626	-2.03723	58.3773
CIC/07-112	19.8	1.90487	-1.71729	61.1971
CIC/07-111	19.6	1.85465	-1.80193	61.1421
CIC/07-110	19.4	1.84935	-1.7932	44.4471
CIC/07-109	19.2	1.92128	-2.06002	55.1779
CIC/07-108	19	1.8633	-2.07884	57.5034
CIC/07-107	18.8	1.97126	-1.74053	61.0378
CIC/07-106	18.6	1.84131	-1.92059	58.7244
CIC/07-105	18.52	0.555795	-1.36864	60.3217
CIC/07-105	18.52	1.84086	-2.00413	53.9969
CIC/07-104	18.39	1.81068	-1.65937	60.5846
CIC/07-103	18.3	1.89857	-1.88192	57.4014
CIC/07-102	18.21	1.90128	-1.96128	57.7548
CIC/07-101	18.15	1.81212	-1.91372	64.0713
CIC/07-100	18.07	1.87982	-2.06765	57.9545
CIC/07-99	18	1.82948	-1.72498	61.4264
CIC/07-98	17.8	1.84112	-1.55264	65.9533
CIC/07-97	17.6	1.87348	-1.96986	55.5117
CIC/07-96	17.4	1.68443	-1.76443	67.6514
CIC/07-95	17.2	1.91648	-1.70323	62.2826
CIC/07-94	16.95	1.81979	-1.86184	59.5063
CIC/07-93	16.75	2.21212	-1.95524	56.469
CIC/07-92	16.64	1.77411	-1.66591	66.5789
CIC/07-91	16.56	1.6363	-2.4744	49.4943
CIC/07-90	16.31	1.63444	-1.85513	61.7885
CIC/07-89	16.17	1.81281	-2.04343	55.357
CIC/07-88	15.98	1.64612	-2.31509	59.32
CIC/07-87	15.82	1.95446	-2.18427	56.6181
CIC/07-86	15.71	1.96903	-1.68908	64.5385
CIC/07-85	15.57	1.97069	-1.8459	59.8521
CIC/07-84	15.43	1.83534	-1.95787	59.9366
CIC/07-83	15.22	1.8166	-2.14761	58.1112
CIC/07-82	14.92	1.63881	-1.96543	65.9758
CIC/07-80	14.6	1.70457	-1.74395	60.7341
CIC/07-79	14.52	0.423473	-3.09568	39.2307
CIC/07-79	14.52	1.05889	-2.73387	44.6446
CIC/07-78	14.32	1.90891	-2.08683	57.4923
CIC/07-77	14.1	1.68897	-2.41512	50.4545
CIC/07-76	13.85	2.21793	-1.64874	67.4233
CIC/07-75	13.65	1.97223	-2.26445	53.9461
CIC/07-74	13.55	2.18738	-1.76592	61.5952
CIC/07-73	13.25	2.00532	-2.27182	56.2348
CIC/07-72	13.2	2.10323	-1.73618	66.4713
CIC/07-71	13	1.62941	-2.48503	48.6849
CIC/07-70	12.86	1.98093	-1.7903	61.0921
CIC/07-69	12.75	1.48759	-2.52015	47.3196
CIC/07-68	12.62	2.18469	-2.01402	54.001
CIC/07-67	12.4	2.13959	-2.20486	55.8715
CIC/07-66	12.3	2.3333	-1.82809	57.1044
CIC/07-65	12.15	2.23943	-2.03256	53.9277
CIC/07-64	11.9	2.31826	-1.94931	60.8537
CIC/07-63	11.8	2.22064	-2.16759	55.8317
CIC/07-62	11.64	2.39583	-1.69335	62.568
CIC/07-61	11.5	2.20553	-2.19689	51.7089
CIC/07-60	11.4	2.39359	-1.79027	66.7392
CIC/07-59	11.15	2.26868	-2.09802	51.8981
CIC/07-58	11	2.38174	-1.77924	60.9285
CIC/07-57	10.94	1.85165	-1.9259	61.0107
CIC/07-56	10.84	2.31862	-1.79856	59.0999
CIC/07-55	10.55	2.16892	-1.86771	59.116
CIC/07-54	10.38	2.2246	-1.83082	67.7029
CIC/07-53	10.25	2.17395	-2.0559	58.261
CIC/07-52	10.01	1.99095	-2.25947	58.5116
CIC/07-51	9.81	2.10282	-2.34293	56.2335
CIC/07-50	9.7	2.10852	-1.71777	62.18
CIC/07-49	9.48	1.56442	-2.73756	46.2338
CIC/07-49	9.48	1.82294	-2.11129	57.0971
CIC/07-48	9.33	2.16885	-2.0703	62.2212
CIC/07-47	9.11	2.01368	-2.49364	49.7193
CIC/07-46	8.87	2.17486	-1.95699	68.2854
CIC/07-45	8.75	1.88051	-2.36214	52.5189
CIC/07-44	8.51	0.388296	-1.55502	58.5812
CIC/07-44	8.51	1.97478	-2.01292	65.6753
CIC/07-43	8.33	1.43538	-2.77003	42.6944
CIC/07-42	8.13	1.60892	-2.43086	57.2588
CIC/07-41	8.07	0.778752	-3.24316
CIC/07-41	8.07	0.552555	-3.45394
CIC/07-40	7.78	1.4833	-2.46263	51.281
CIC/07-39	7.65	1.30057	-2.91609
CIC/07-38	7.43	2.20496	-1.85111	59.6184
CIC/07-37	7.15	2.17168	-2.33299	54.1979
CIC/07-36	6.98	2.0789	-1.9915	62.186
CIC/07-35	6.74	1.88003	-2.40943	51.9207
CIC/07-34	6.55	2.03646	-1.98685	54.9636
CIC/07-33	6.36	1.71018	-2.45077	40.6406
CIC/07-32	6.14	1.90311	-2.04053	57.2617
CIC/07-31	5.98	1.90759	-2.49178	43.6115
CIC/07-30	5.84	2.32342	-1.78954	60.4996
CIC/07-29	5.63	1.82526	-2.56219	37.2284
CIC/07-28	5.41	2.38269	-1.93507	57.5231
CIC/07-27	5.11	2.47018	-1.94857	57.5307
CIC/07-26	4.81	2.39629	-1.97963	55.3148
CIC/07-25	4.36	2.62272	-1.85679	59.8797
CIC/07-24	4.045	2.53499	-2.07941	51.0302
CIC/07-23	3.905	2.47652	-1.77829	56.3631
CIC/07-22	3.75	2.28138	-2.20856	50.9446
CIC/07-21	3.71	2.32305	-1.93868	55.3352
CIC/07-20	3.655	2.38593	-2.08516	51.539
CIC/07-19	3.58	2.47992	-2.10241	54.5627
CIC/07-18	3.51	2.43007	-2.11091	54.5981
CIC/07-18	3.51	1.69361	-2.29298	54.222
CIC/07-18	3.51	2.36322	-2.16686	55.2793
CIC/07-17	3.46	2.36308	-1.92907	58.0637
CIC/07-16	3.265	2.09227	-2.36883	42.3992
CIC/07-15	2.81	2.22904	-2.33669	51.5579
CIC/07-14	2.76	2.37039	-1.91371	63.6308
CIC/07-13	2.48	2.19712	-2.43741	51.7596
CIC/07-12	2.2	2.15093	-2.3798	51.1916
CIC/07-11	2.095	2.25353	-2.28846	53.3715
CIC/07-10	1.985	2.30126	-2.27037	54.1988
CIC/07-9	1.805	2.16567	-2.31422	50.747
CIC/07-8	1.715	1.96287	-2.54765	41.4938
CIC/07-7	1.6	2.45571	-2.05538	55.8108
CIC/07-6	1.07	1.67516	-2.47893	47.2836
CIC/07-5	0.74	1.49091	-2.88947	32.3955
CIC/07-4	0.62	2.13621	-2.23889	45.5217
CIC/07-3	0.34	1.8837	-2.52055	49.2552
CIC/07-2	0.1375	2.33087	-1.94741	55.3917
CIC/07-1	0.09	2.11275	-2.18619	55.213
CIC/07-274
