# Supplementary material for: Stable isotope and calcareous nannofossil assemblage record of the late Paleocene and early Eocene (Cicogna section)
Source: Copernicus journal article supplement (doi:10.5194/cp-12-883-2016), 2016-04-11
Supplement: Supplementary file 3 [file 20160314_TableS02_nannos.xls]

## Sheet: raw data
sample	Height (m)	Biantholithusspp.	Biantholithussp.1	Biscutum cf.	Biscutum spp.	Braarudosphaera spp.	Calcidiscus kingii	Calcidiscus cf. kingii (elliptic)	Campylosphaera eodela/dela	Cepekiella lumina	Chiasmolithus californicus (13-21μm)	Chiasmolithus consuetus (5-12μm)	Chiasmolithusconsuetus/C. danicus	Chiasmolithus grandis	Chiasmolithus bidens/C.solitus	Chiasmolithus titus	Chiasmolithusspp.	Chiphragmalithus spp. (circolare)	Chiphragmalithus spp. (ellitico)	Clausicoccus spp.	Coccolithus eopelagicus (16-20μm)	Coccolithus jugatum	Coccolithus miopelagicus (13-16μm)	Coccolithus pelagicus (6-13μm)	Cruciplacolithus latipons	Cruciplacolithus tenuis	Cruciplacolithus sp.1	Discoaster anartios	Discoaster araneus	Discoaster barbadiensis	Discoaster binodosus	Discoaster delicatus	Discoaster diastypus	Discoaster diastypussalisburgensis	Discoaster kuepperi	Discoaster kuepperi/D. salisburgensis	Discoaster lenticularis	Discoaster lodoensis	Discoaster mahmoudii	Discoaster medious	Discoaster mohleri	Discoaster multiradiatus	Discoaster mohleri/D. nobilis gr.	Discoaster nobilis gr.	Discoaster nonaradiatus.	Discoaster robustus	Discoaster salisburgensis	Discoaster tani nodifer	Discoaster splendidus
CIC/07-1	0.09	1	0	0	0	0	0	0	0	0	0	0	0	0	0	0	1	0	0	0	0	0	0	100	0	0	0	0	0	0	0	0	0	0	0	0	0	0	0	0	2	0	0	0	0	0	0	0	1
CIC/07-6	1.07	2	0	1	0	1	0	0	0	0	0	4	0	0	1	0	0	0	0	0	0	0	1	142	0	0	0	0	0	0	0	1	0	0	0	0	0	0	0	0	3	0	0	0	0	0	0	0	0
CIC/07-11	2.095	0	0	0	0	1	0	0	0	0	0	3	0	0	0	0	0	0	0	0	0	0	1	188	0	1	0	0	0	0	0	0	0	0	0	0	0	0	0	0	1	0	0	0	0	0	0	0	0
CIC/07-16	3.265	0	0	1	0	0	0	0	0	0	0	2	0	0	1	0	0	0	0	0	0	0	0	157	0	1	0	0	0	0	0	0	0	0	0	0	0	0	0	0	3	0	0	1	0	0	0	0	0
CIC/07-18	3.51	0	0	0	0	0	0	0	0	0	1	1	0	0	1	0	0	0	0	0	0	0	2	98	0	fc	0	0	0	0	0	0	0	0	0	0	0	0	0	0	1	0	0	0	0	0	0	0	0
CIC/07-20	3.655	0	0	0	0	0	0	0	0	0	0	2	0	0	0	0	0	0	0	0	0	0	0	127	0	1	0	0	0	0	0	0	0	0	0	0	0	0	0	0	0	0	0	1	0	0	0	0	0
CIC/07-24	4.045	0	0	0	0	0	0	0	0	2	1	0	0	0	0	0	0	0	0	0	0	1	0	273	0	0	0	0	0	0	0	0	0	0	0	0	0	0	0	0	2	0	0	0	0	0	0	0	0
CIC/07-27	5.11	1	0	0	0	0	0	0	0	0	1	2	0	0	1	0	0	0	0	0	0	0	0	135	0	0	0	0	0	0	0	0	0	0	0	0	0	0	0	0	0	0	1	0	0	0	0	0	0
CIC/07-32	6.14	1	0	0	0	0	0	0	0	2	1	1	0	0	0	0	0	0	0	0	0	0	0	97	0	0	0	0	0	0	0	0	0	0	0	0	0	0	0	0	0	0	0	0	0	0	0	0	0
CIC/07-36	6.98	2	3	0	0	0	0	0	0	0	0	1	0	0	0	0	0	0	0	0	0	0	1	127	0	0	0	0	0	0	0	0	0	0	0	0	0	0	0	0	0	0	0	0	0	0	0	0	0
CIC/07-41	8.07	1	0	1	0	0	0	0	0	0	0	5	0	0	0	0	0	0	0	0	0	0	4	150	0	0	0	0	0	0	0	0	0	0	0	0	0	0	0	0	0	0	0	0	0	0	0	0	0
CIC/07-42	8.13	0	1	0	0	1	0	0	0	0	0	0	0	0	0	0	0	0	0	0	0	0	0	98	0	0	0	0	0	0	0	0	0	0	0	0	0	0	0	0	0	0	0	0	0	0	0	0	0
CIC/07-43	8.33	0	0	0	0	0	0	0	0	0	0	0	0	0	0	0	0	0	0	0	0	0	5	177	0	0	0	0	0	0	0	1	0	0	0	0	0	0	0	0	0	0	0	0	0	0	0	0	0
CIC/07-44	8.51	1	1	0	0	0	0	0	0	0	0	1	0	0	0	0	0	0	0	0	0	0	0	70	0	0	0	0	0	0	0	0	0	0	0	0	0	0	0	0	0	0	0	0	0	0	0	0	0
CIC/07-45	8.75	1	0	0	0	0	0	0	0	0	fc	2	0	0	0	0	0	0	0	0	fc	0	0	150	0	0	0	0	0	0	0	1	0	0	0	0	0	0	0	0	0	0	0	0	0	0	0	0	0
CIC/07-47	9.11	1	0	0	0	0	0	0	0	3	0	1	0	0	0	0	0	0	0	0	0	1	11	204	0	1	0	0	0	0	0	0	0	0	0	0	0	0	0	0	3	0	0	0	0	0	0	0	0
CIC/07-52	10.01	0	0	0	0	0	0	0	0	0	0	0	0	0	0	0	0	0	0	0	0	1	4	137	0	0	0	0	0	0	0	4	0	0	0	0	0	0	0	0	0	cf	0	1	0	0	0	0	0
CIC/07-58	11	1	1	0	0	0	0	0	0	2	1	0	1	0	1	0	0	0	0	0	0	0	1	154	0	0	0	0	0	0	0	0	0	0	0	0	0	0	0	0	1	1	0	0	0	0	0	0	0
CIC/07-65	12.15	1	0	1	0	0	0	0	0	1	0	0	0	0	1	0	0	0	0	0	0	0	2	177	0	1	1	0	0	0	0	1	0	0	0	0	0	0	0	0	1	2	0	0	0	0	0	0	0
CIC/07-71	13	2	0	0	0	0	0	0	1	1	fc	1	0	0	0	0	0	0	0	0	0	0	2	157	0	0	0	0	0	0	0	2	0	0	0	0	1	0	0	0	0	5	0	0	0	0	0	0	0
CIC/07-77	14.1	0	0	0	0	0	0	0	0	0	0	1	0	0	0	0	0	0	0	0	0	0	0	134	0	0	0	0	0	0	0	2	0	0	0	0	1	0	0	0	2	2	0	0	0	0	0	0	0
CIC/07-79	14.52	0	0	0	0	0	0	0	1	0	0	0	0	0	0	0	0	0	0	0	0	0	1	106	0	0	0	0	0	0	0	0	0	0	0	0	0	0	0	0	0	3	0	0	0	0	0	0	0
CIC/07-82	14.92	0	0	2	0	0	0	0	0	0	1	0	0	0	1	0	0	0	0	0	0	0	2	117	0	0	0	0	0	0	0	0	0	0	0	0	1	0	0	0	1	12	0	1	0	0	0	0	0
CIC/07-88	15.98	1	0	0	0	0	0	0	0	1	0	2	0	0	0	0	0	0	0	0	0	0	1	114	0	0	0	0	0	0	0	0	0	0	0	0	0	0	0	0	0	5	0	0	0	0	0	0	0
CIC/07-94	16.95	1	1	0	0	0	0	0	0	0	1	1	0	0	1	0	0	0	0	0	0	0	fc	113	0	1	0	0	0	0	0	1	0	0	0	0	1	0	0	0	2	4	0	0	0	0	0	0	0
CIC/07-99	18	1	0	0	0	0	0	0	0	1	0	0	0	0	0	0	0	0	0	0	0	2	fc	116	0	0	0	0	0	0	0	1	0	0	0	0	0	0	0	0	0	6	0	0	0	0	0	0	0
CIC/07-105	18.52	0	0	1	0	0	0	0	0	0	fc	1	0	0	1	0	0	0	0	0	0	0	2	98	0	0	0	0	0	0	0	0	0	0	0	0	0	0	0	0	0	1	0	0	0	0	0	0	0
CIC/07-108	19	0	0	0	0	0	0	0	0	1	fc	fc	0	0	fc	0	0	0	0	0	0	0	1	154	0	0	0	0	0	0	0	1	0	0	0	0	1	0	0	0	0	2	0	0	0	0	0	0	0
CIC/07-113	20	1	0	0	0	0	0	0	1	0	0	0	0	0	0	0	0	0	0	0	0	0	2	144	0	0	0	0	0	0	0	0	0	0	0	0	3	0	0	0	0	2	0	0	0	0	0	0	0
CIC/07-122	20.99	0	0	0	0	0	0	0	1	1	0	0	0	0	0	0	0	0	0	0	0	0	0	60	0	0	0	0	0	0	0	0	0	0	0	0	0	0	0	0	0	9	0	0	0	0	0	0	0
CIC/07-127	22	0	0	0	0	0	0	0	0	0	0	0	0	0	0	0	0	0	0	0	0	0	0	108	0	0	0	0	0	0	0	1	0	0	0	0	0	0	0	0	0	4	0	0	0	0	0	0	0
CIC/07-133	23	fc	0	0	0	1	0	0	0	1	0	0	0	0	fc	0	0	0	0	0	0	0	fc	111	0	0	0	0	0	0	0	1	0	0	0	0	1	0	0	0	0	1	0	0	0	0	0	0	0
CIC/07-138	24	3	0	0	0	0	0	0	0	0	0	0	0	0	0	0	0	0	0	0	0	0	1	130	0	0	0	0	0	0	0	0	0	0	0	0	0	0	0	0	1	1	0	1	0	0	0	0	0
CIC/07-143	25	1	0	0	0	0	0	0	0	0	fc	0	0	0	0	0	0	0	0	0	0	0	0	140	0	0	0	0	0	0	0	0	0	0	0	0	0	0	0	0	0	3	0	0	0	0	0	0	0
CIC/07-148	26	1	0	0	0	0	0	0	0	1	0	fc	0	0	1	0	0	0	0	0	0	0	3	137	0	0	0	0	0	0	0	0	0	0	0	0	0	0	0	0	0	1	0	0	0	0	0	0	0
CIC/07-153	27	0	0	0	0	0	0	0	1	1	0	0	0	0	0	0	0	0	0	0	0	0	0	71	0	1	0	0	0	0	0	0	0	0	0	0	1	0	0	0	0	6	0	0	0	0	0	0	0
CIC/07-158	28	0	0	0	0	0	0	0	2	0	fc	5	0	0	0	0	0	0	0	0	0	0	0	142	0	0	0	0	0	0	0	0	0	0	0	0	1	0	0	0	0	1	0	0	0	0	0	0	0
CIC/07-162	28.7	0	0	0	0	3	0	0	0	0	0	2	0	0	0	0	0	0	0	0	0	0	2	129	0	0	0	0	0	0	0	0	0	0	0	0	0	0	0	0	0	7	0	2	0	0	0	0	0
CIC/07-163	28.75	0	0	0	0	0	0	0	0	0	0	0	0	0	0	0	0	0	0	0	0	0	0	0	0	0	0	0	0	0	0	0	0	0	0	0	0	0	0	0	0	0	0	0	0	0	0	0	0
CIC/07-164	28.8	0	0	0	0	0	0	0	0	0	0	0	0	0	0	0	0	0	0	0	0	0	0	0	0	0	0	0	0	0	0	0	0	0	0	0	0	0	0	0	0	0	0	0	0	0	0	0	0
CIC/07-165	28.85	0	0	0	0	0	0	0	0	0	0	2	0	0	0	0	0	0	0	0	0	0	0	6	0	0	0	0	0	0	0	0	0	0	0	0	1	0	0	0	0	0	0	0	0	0	0	0	0
CIC/07-166	28.9	0	0	0	1	1	0	0	0	0	0	0	0	0	1	0	0	0	0	0	0	0	3	68	0	0	0	0	0	0	1	1	0	0	cf	0	2	0	0	0	4	25	0	0	0	0	0	0	0
CIC/07-167	28.95	0	0	0	0	0	0	0	0	0	0	0	0	0	0	0	0	0	0	0	0	0	0	12	0	0	0	1	0	0	0	0	0	0	0	0	0	0	0	0	0	2	0	0	0	0	1	0	0
CIC/07-168	29	0	0	0	0	0	0	0	0	0	0	0	0	0	0	0	0	0	0	0	0	0	1	193	0	0	0	0	0	0	0	0	0	0	0	0	2	0	0	0	0	1	0	1	0	0	0	0	0
CIC/07-171	29.15	2	0	0	3	1	0	0	0	0	0	2	0	0	0	0	0	0	0	0	0	0	5	143	0	0	0	0	0	0	0	0	0	0	0	0	0	0	0	0	0	1	0	0	0	0	0	0	0
CIC/07-172	29.2	0	1	0	0	1	0	0	0	0	0	2	0	0	0	0	0	0	0	0	0	0	4	149	0	0	0	0	0	0	0	0	0	0	0	0	2	0	0	0	1	5	0	2	0	0	0	0	0
CIC/07-173	29.25	0	0	0	0	1	0	0	0	0	0	1	0	0	0	0	0	0	0	0	0	0	8	141	0	0	0	0	0	0	0	0	0	0	0	0	0	0	0	0	1	4	0	0	0	0	1	0	0
CIC/07-175	29.4	1	1	0	1	1	0	0	0	0	0	0	0	0	0	0	0	0	0	0	0	0	9	125	0	1	0	0	6	0	0	0	0	0	0	0	0	0	0	0	0	3	0	0	0	0	0	0	0
CIC/07-181	30	1	0	0	0	0	0	0	0	0	0	1	0	0	0	0	0	0	0	0	0	0	3	157	0	0	0	0	3	0	0	0	0	0	0	0	2	0	0	0	0	4	0	0	0	0	0	0	0
CIC/07-191	31	0	0	0	0	0	0	0	0	1	0	0	0	0	0	0	0	0	0	0	0	0	9	150	0	0	0	1	3	0	0	1	0	0	0	0	0	0	0	0	0	10	0	0	0	0	1	0	0
CIC/07-198	31.7	0	0	0	0	0	0	0	1	1	0	1	0	0	0	0	0	0	0	0	0	0	7	163	0	1	0	0	0	0	1cf	0	0	0	0	0	0	0	0	0	1	5	0	0	0	0	0	0	0
CIC/07-201	32.03	0	0	0	0	0	0	0	0	0	0	0	0	0	0	0	0	0	0	0	0	0	4	162	0	0	0	0	1	0	0	1	0	0	0	0	1	0	0	0	3	6	0	1	0	0	0	0	0
CIC/07-211	33	0	0	0	0	0	1	0	0	1	0	1	0	0	0	1	0	0	0	0	0	0	2	118	0	0	0	0	0	0	0	1	0	0	0	0	1	0	0	0	0	1	0	0	0	0	0	0	0
CIC/07-222	34.03	0	1	0	0	0	0	0	0	0	0	1	0	0	0	0	0	0	0	0	fc	0	1	124	0	0	0	0	0	0	0	0	0	0	0	0	0	0	0	0	2	2	0	0	0	0	0	0	0
CIC/07-228	35.02	1	1	0	0	0	0	0	0	1	0	1	0	0	0	0	0	0	0	0	0	0	1	175	0	0	0	0	0	0	0	0	0	0	0	0	0	0	0	0	1	1	0	1	0	0	4	0	0
CIC/07-238	36.13	0	0	0	0	0	0	0	fc	1	0	2	0	0	fc	0	0	0	0	0	0	0	4	125	0	0	0	0	0	0	0	0	0	0	0	0	0	0	0	0	0	7	0	2	0	0	1	0	0
CIC/07-247	37.09	0	0	0	0	0	0	0	0	0	0	1	0	0	fc	0	0	0	0	0	1	0	1	115	1	0	1	0	0	0	0	0	0	0	0	0	1	0	0	0	0	3	0	0	0	0	0	0	0
CIC/07-257	38.02	0	fc	0	fc	0	fc	0	0	0	0	fc	0	0	fc	0	0	0	0	0	0	0	2	104	0	0	0	0	0	0	0	0	0	0	cf	0	1	0	0	0	1	4	0	0	0	0	0	0	0
CIC/07-269	39.03	0	2	1	0	1	0	0	1	1	0	1	0	0	1	0	0	0	0	0	0	1	3	87	0	0	0	0	0	0	0	0	0	0	0	0	1	0	0	0	cf	1	0	1	0	0	5	0	0
CIC/07-277	40	0	0	0	0	0	0	0	0	0	0	0	0	0	1	0	0	0	0	0	0	0	0	70	0	0	1	0	0	0	0	0	0	0	0	0	0	0	0	0	0	0	0	0	0	0	2	0	0
CIC/07-282	41	0	0	0	0	fc	1	0	1	0	0	0	0	0	fc	0	0	0	0	0	0	fc	1	52	0	0	0	0	0	0	2	0	0	0	0	2	3	0	0	0	0	4	0	1	1	0	2	0	0
CIC/07-288	42	0	1	1	0	fc	0	0	2	1	0	fc	0	0	0	0	0	0	0	0	0	1	1	75	0	0	0	0	0	0	0	0	0	1	0	0	1	0	0	0	0	1	0	0	0	0	1	0	0
CIC/07-293	43	3	0	0	0	0	0	0	0	1	fc	0	0	0	0	0	0	0	0	1	1	0	2	72	0	fc	0	0	0	0	0	0	0	3	0	0	0	0	0	0	2	3	0	0	0	0	4	0	0
CIC/07-299	44	0	1	0	0	0	0	0	1	0	0	0	0	0	1	0	0	0	0	0	0	0	0	101	0	0	0	0	0	0	2	0	1	0	0	0	0	0	0	0	0	2	0	0	0	0	10	0	0
CIC/07-304	45	1	0	0	0	0	0	0	4	0	0	1	0	0	1	0	0	0	0	0	0	1	2	81	0	0	0	0	0	0	0	0	0	0	0	1	1	0	0	0	0	1	0	0	0	0	3	0	0
CIC/07-309	46	0	2	0	0	0	0	0	0	0	1	0	0	0	1	0	0	0	0	0	0	1	3	53	0	0	0	0	0	0	1	0	0	0	0	0	1	0	0	0	0	0	0	1	0	0	4	0	0
CIC/07-314	47	0	fc	0	1	0	0	0	1	1	0	3	0	0	0	0	0	0	0	0	0	0	2	117	0	0	0	0	0	0	2	0	3	1	cf	1	2	0	0	0	0	2	0	0	0	0	2	0	0
CIC/07-319	48	0	0	0	0	1	0	0	2	1	0	0	0	0	0	0	1	0	0	0	0	0	2	149	0	0	0	0	0	0	1	0	4	0	3	4	1	0	0	0	0	1	0	0	1	0	5	0	2
CIC/07-324	49	1	1	0	0	0	0	0	0	0	0	3	0	0	0	0	0	0	0	0	0	0	0	68	0	0	0	0	0	0	1	0	0	0	0	0	2	0	0	0	0	0	0	cf	0	0	4	0	0
CIC/07-329	50	0	0	0	0	1	0	0	1	0	0	2	0	0	1	1	0	0	0	0	0	1	3	94	0	0	0	0	0	0	0	0	1	0	0	0	0	0	0	0	0	0	0	0	0	0	3	0	0
CIC/07-334	51	0	0	0	0	1	0	0	1	1	2	3	0	0	0	0	0	0	0	1	0	0	5	90	0	0	0	0	0	0	3	0	1	0	0	2	0	0	0	0	1	0	0	0	0	0	1	0	0
CIC/07-339	52	0	0	0	0	0	0	0	0	1	1	5	0	0	1	0	0	0	0	0	0	0	7	42	0	0	0	0	0	0	1	0	1	0	0	2	0	0	0	0	0	0	0	0	0	0	4	0	0
CIC/07-344	53	0	0	0	0	0	0	0	1	1	0	6	0	0	0	0	0	0	0	0	0	1	2	63	0	0	0	0	0	0	3	0	1	0	0	0	0	0	0	0	0	0	0	0	1	1	3	0	0
CIC/07-350	53.9	1	0	0	0	0	0	0	4	2	0	3	0	0	1	0	0	0	2	0	0	2	0	62	0	0	0	0	0	1	2	0	1	2	4	0	0	0	0	0	0	0	0	0	0	0	2	0	0
CIC/07-349	54	0	0	1	0	0	1	0	1	1	0	3	0	0	0	0	0	0	0	0	0	0	8	64	0	0	0	0	0	0	0	0	3	0	4cf	0	2	0	0	0	0	1	0	1	0	1	7	0	0
CIC/07-351	54.1	1	0	0	0	1	0	1	1	3	0	fc	0	0	0	1	0	0	0	0	0	1	5	80	0	0	0	0	0	0	2	0	1	0	3	3	0	0	0	0	0	1	0	2	0	1	3	0	0
CIC/07-352	54.2	0	0	0	0	0	1	0	0	1	0	3	0	0	0	1	0	0	0	0	0	0	6	94	0	0	0	0	0	0	3	0	3	1	1	2	0	0	0	0	0	0	0	0	0	0	3	0	0
CIC/07-353	54.3	0	0	0	0	1	3	0	3	0	0	8	0	0	0	0	0	0	0	0	0	1	8	99	0	0	0	0	0	cf	10	0	0	1	2	0	1	0	0	0	1	0	0	2	0	0	4	0	0
CIC/07-354	54.4	0	0	0	1	1	0	0	1	0	0	4	0	0	1	0	0	0	1	0	2	0	3	65	0	0	1	0	0	0	3	0	9	0	0	0	0	0	0	0	1	0	0	2	0	0	1	0	0
CIC/07-355	54.5	0	0	0	1	2	0	0	0	3	0	3	0	0	0	2	0	0	0	0	0	1	10	59	0	0	0	0	0	0	1	0	0	0	0	0	1	cf	0	0	0	0	0	1	0	0	3	0	0
CIC/07-356	54.6	0	0	0	0	0	0	0	1	0	0	5	0	0	0	0	0	0	0	1	0	0	7	56	0	0	0	0	0	0	4	0	2	0	2	1	0	0	0	0	1	0	0	1	1	0	0	0	0
CIC/07-357	54.7	0	0	0	0	0	1	0	0	1	0	6	0	0	0	1	1	0	0	0	0	0	7	59	0	0	0	0	0	0	3	0	0	0	2	0	0	0	0	0	0	0	0	0	0	0	2	0	0
CIC/07-358	54.8	0	0	0	1	0	1	0	1	2	0	5	0	0	0	0	1	0	0	0	0	0	6	45	0	0	1	0	0	0	2	0	3	1	5	1	0	cf	0	0	0	0	0	0	0	0	0	0	0
CIC/07-359	54.9	0	1	0	1	1	0	0	2	1	0	2	0	0	0	0	0	0	0	0	0	0	8	37	0	0	0	0	0	0	4	0	0	0	3	1	0	0	0	0	1	0	0	0	0	0	4	0	0
CIC/07-361	55.1	1	0	0	0	1	0	0	0	3	0	0	2	0	0	0	0	0	0	0	0	0	4	39	0	0	0	0	0	0	1	0	2	2	5	0	0	0	0	0	0	0	0	0	0	0	3	0	0
CIC/07-367	56.1	0	0	0	0	1	1	0	3	2	0	0	0	0	0	0	0	0	0	0	0	1	4	78	0	0	0	0	0	cf	1	0	1	0	3	1	0	0	0	0	0	0	0	1	0	0	1	0	0
CIC/07-372	57.1	0	0	0	0	5	0	0	0	1	0	9	0	0	0	0	0	0	0	0	0	0	4	50	0	0	0	0	0	0	4	0	3	0	3	1	1	0	0	0	0	1	0	1	1	0	2	0	0
CIC/07-377	58.1	1	0	0	0	0	0	0	0	1	0	1	0	0	0	0	0	0	0	0	0	0	7	57	0	0	0	0	0	0	1	0	1	0	0	1	1	0	0	0	0	3	0	1	0	0	1	0	0
CIC/07-382	59.1	2	0	0	0	0	0	0	2	6	0	2	0	0	0	0	0	0	1	0	0	1	5	57	0	0	0	0	0	0	1	0	1	1	2	0	0	0	0	0	0	0	2	0	0	0	2	0	0
CIC/07-387	60.1	0	0	0	0	5	0	0	0	3	0	0	0	0	fc	0	0	0	0	0	1	0	7	49	0	0	0	0	0	0	2	0	1	0	8	2	0	0	0	0	0	1	0	0	0	0	2	0	0
CIC/07-389	60.5	0	0	0	0	0	fc	0	0	2	0	4	0	0	0	0	0	cf	4	fc	0	0	2	52	0	0	0	0	0	0	0	0	0	0	1	0	0	cf	0	0	cf	0	0	0	0	0	1	0	0
CIC/07-392	61.1	0	0	0	0	1	0	0	0	0	0	1	0	0	fc	1	0	0	0	0	0	0	0	41	0	0	0	0	0	0	3	0	1	0	1	0	0	cf	0	0	0	0	0	0	0	0	4	0	0
CIC/07-393	61.3	0	0	0	0	0	0	0	1	1	0	3	0	0	0	0	0	0	2	2	2	0	3	42	0	0	0	0	0	0	4	0	4	0	7	0	0	0	0	0	0	0	0	0	0	0	0	0	0
CIC/07-395	61.7	0	0	0	0	1	0	0	1	2	0	7	0	1	2	0	0	0	2	0	0	0	4	38	1	0	0	0	0	0	3	0	3	0	8	0	0	0	0	0	0	0	0	0	0	0	1	0	0
CIC/07-397	62.1	1	1	0	0	0	0	0	1	1	0	2	0	0	0	1	0	0	0	0	0	0	3	38	0	0	0	0	0	0	3	0	1	0	2	0	0	0	0	0	0	cf	0	0	0	0	0	0	0
CIC/07-402	63.1	0	1	0	0	0	1	0	0	5	0	2	0	0	1	1	0	0	0	0	0	0	5	49	0	0	0	0	0	0	3	0	0	0	0	0	0	0	0	0	0	0	0	3	0	0	2	0	0
CIC/07-407	64	0	3	0	0	0	2	0	1	1	0	3	0	0	0	0	0	0	1	0	0	1	6	26	0	0	0	0	0	0	3	0	0	1	3	0	0	0	0	0	0	0	0	0	0	0	3	1	0
CIC/07-412	65	0	0	0	0	0	0	0	2	4	fc	3	0	0	0	0	0	0	0	0	fc	1	6	51	0	0	0	0	0	0	2	0	0	0	2	2	0	0	0	0	0	0	0	0	0	0	4	0	0
CIC/07-417	66	0	1	0	0	1	0	0	0	3	0	2	0	0	0	1	0	0	0	0	0	0	7	46	0	0	0	0	0	0	2	0	3	2	6	0	0	0	0	0	0	0	0	0	0	0	4	0	0
CIC/07-422	67	0	2	0	0	2	0	0	0	1	0	2	0	0	0	0	0	0	0	0	0	0	1	36	0	0	0	0	0	0	7	0	1	0	5	0	0	0	0	0	1	0	0	0	0	0	0	0	0
CIC/07-427	68	2	1	0	0	2	0	0	0	3	0	4	0	0	0	0	0	2	0	0	0	fc	5	34	0	0	0	0	0	0	2	0	0	0	5	0	0	0	0	0	0	0	0	0	1	0	2	0	0
CIC/07-432	69	0	4	0	0	0	0	0	0	4	0	3	0	0	0	0	0	0	1	0	1	4	5	22	0	0	0	0	0	0	0	0	0	0	4	0	0	0	0	0	0	0	0	0	0	0	0	0	0
CIC/07-437	70	0	3	0	0	2	1	0	0	2	0	6	0	0	0	0	0	0	0	0	0	0	0	43	0	0	0	0	0	0	4	0	1	0	7	0	0	0	0	0	0	0	0	0	1	0	1	0	0
CIC/07-442	71	0	1	0	0	1	1	0	0	1	0	4	0	0	0	0	0	0	1	0	0	2	2	48	0	0	0	0	0	0	0	0	0	0	11	0	0	0	0	0	0	0	0	0	0	0	0	0	0
CIC/07-447	72	0	2	0	0	0	0	0	2	0	2	0	0	1	0	0	0	2	1	1	0	2	6	61	0	0	0	0	0	0	9	0	1	0	7	0	0	0	0	0	0	0	0	0	1	0	0	0	0
CIC/07-449	72.4	0	0	0	0	0	0	0	0	1	0	2	0	0	fc	0	0	1	0	0	1	0	3	41	0	0	0	0	0	0	2	0	0	0	13	0	0	0	0	0	0	0	0	0	0	0	0	0	0
CIC/07-450	72.6	1	0	0	0	0	0	0	1	0	0	2	0	0	1	0	0	0	0	0	0	0	2	64	0	0	0	0	0	0	2	0	0	0	14	0	0	0	0	0	0	0	0	0	0	0	0	0	0
CIC/07-451	72.8	0	1	0	0	0	3	1	0	1	0	3	0	0	0	0	0	1	0	0	0	0	1	56	0	0	0	0	0	0	1	0	1	0	9	0	0	0	0	0	0	0	0	0	0	0	0	0	0
CIC/07-451 bis	72.79	1	0	0	0	1	4	0	5	1	0	13	0	0	0	2	0	0	1	0	0	1	2	81	0	0	0	0	0	0	1	0	1	0	13	0	0	3	0	0	0	0	0	0	0	0	0	0	0
CIC/07-452	73.8	0	0	0	0	1	1	0	0	0	0	0	0	0	0	1	0	1	1	0	0	0	3	17	0	0	0	0	0	0	3	0	0	0	7	0	0	cf	0	0	0	0	0	0	0	0	0	0	0
CIC/07-457	74	0	1	0	0	2	0	0	0	1	0	3	0	0	0	0	0	0	0	0	0	0	1	19	0	0	0	0	0	0	0	0	0	0	4	0	0	0	0	0	0	0	0	0	0	0	0	0	0
CIC/07-462	75	0	0	0	0	2	0	0	0	1	0	0	0	0	0	0	0	0	0	0	0	1	2	9	0	0	0	0	0	0	0	1	0	0	2	0	0	0	0	0	0	0	0	0	0	0	0	0	0
CIC/07-467	76	0	fc	0	0	fc	0	0	0	1	0	1	0	0	0	0	0	1	0	0	0	1	2	19	0	0	0	0	0	0	1	0	0	0	3	0	0	0	0	0	0	0	0	0	0	0	0	0	0
CIC/07-472	77	0	1	0	0	2	0	0	0	4	0	2	0	0	1	0	0	0	1	0	0	0	0	28	0	0	0	0	0	0	6	0	2	0	8	0	0	0	0	0	0	0	0	0	0	1	0	0	0
CIC/07-477	78	0	0	0	0	7	0	0	0	2	0	1	0	0	1	0	0	0	0	0	0	0	7	32	0	0	0	0	0	0	2	0	1	0	6	0	0	0	0	0	0	0	0	0	0	0	0	0	0
CIC/07-482	79	0	2	0	0	0	0	0	0	0	0	0	0	0	2	1	0	0	0	0	0	0	5	48	0	0	0	0	0	0	2	0	0	0	11	0	0	2	0	0	0	0	0	0	0	0	0	0	0
CIC/07-487	80	0	2	0	0	1	0	0	0	0	0	2	0	0	0	0	0	0	0	0	fc	0	4	36	0	0	0	0	0	0	2	0	0	0	9	0	0	0	0	0	0	0	0	0	0	0	0	0	0
CIC/07-492	81	0	0	0	0	fc	0	0	3	1	fc	3	0	1	0	0	0	0	0	0	0	0	10	91	0	0	0	0	0	1	1	0	0	0	5	0	0	3	0	0	0	0	0	0	0	0	0	0	0
[truncated: 82 more columns]

## Sheet: % with thoracosphaera
sample	Height (m)	Biantholithusspp.	Biantholithussp.1	Biscutum cf.	Biscutum spp.	Braarudosphaera spp.	Calcidiscus kingii	Calcidiscus cf. kingii (ellittico)	Campylosphaera eodela/dela	Cepekiella lumina	Chiasmolithus californicus (13-21μm)	Chiasmolithus consuetus (5-12μm)	Chiasmolithusconsuetus/C. danicus	Chiasmolithus grandis	Chiasmolithus bidens/C.solitus	Chiasmolithus titus	Chiasmolithusspp.	Chiphragmalithus spp. (circolare)	Chiphragmalithus spp. (ellitico)	Clausicoccus spp.	Coccolithus eopelagicus (16-20μm)	Coccolithus jugatum	Coccolithus miopelagicus (13-16μm)	Coccolithus pelagicus (6-13μm)	Cruciplacolithus latipons	Cruciplacolithus tenuis	Cruciplacolithus sp.1	Discoaster anartios	Discoaster araneus	Discoaster barbadiensis	Discoaster binodosus	Discoaster delicatus	Discoaster diastypus	Discoaster diastypussalisburgensis	Discoaster kuepperi	Discoaster kuepperi/D. salisburgensis	Discoaster lenticularis	Discoaster lodoensis	Discoaster mahmoudii	Discoaster medious	Discoaster mohleri	Discoaster multiradiatus	Discoaster mohleri/D. nobilis gr.	Discoaster nobilis gr.	Discoaster nonaradiatus.	Discoaster robustus	Discoaster salisburgensis	Discoaster tani nodifer	Discoaster splendidus
CIC/07-1	0.09	0.249377	0	0	0	0	0	0	0	0	0	0	0	0	0	0	0.249377	0	0	0	0	0	0	24.9377	0	0	0	0	0	0	0	0	0	0	0	0	0	0	0	0	0.498753	0	0	0	0	0	0	0	0.249377
CIC/07-6	1.07	0.358423	0	0.179211	0	0.179211	0	0	0	0	0	0.716846	0	0	0.179211	0	0	0	0	0	0	0	0.179211	25.448	0	0	0	0	0	0	0	0.179211	0	0	0	0	0	0	0	0	0.537634	0	0	0	0	0	0	0	0
CIC/07-11	2.095	0	0	0	0	0.16835	0	0	0	0	0	0.505051	0	0	0	0	0	0	0	0	0	0	0.16835	31.6498	0	0.16835	0	0	0	0	0	0	0	0	0	0	0	0	0	0	0.16835	0	0	0	0	0	0	0	0
CIC/07-16	3.265	0	0	0.160256	0	0	0	0	0	0	0	0.320513	0	0	0.160256	0	0	0	0	0	0	0	0	25.1603	0	0.160256	0	0	0	0	0	0	0	0	0	0	0	0	0	0	0.480769	0	0	0.160256	0	0	0	0	0
CIC/07-18	3.51	0	0	0	0	0	0	0	0	0	0.263158	0.263158	0	0	0.263158	0	0	0	0	0	0	0	0.526316	25.7895	0		0	0	0	0	0	0	0	0	0	0	0	0	0	0	0.263158	0	0	0	0	0	0	0	0
CIC/07-20	3.655	0	0	0	0	0	0	0	0	0	0	0.465116	0	0	0	0	0	0	0	0	0	0	0	29.5349	0	0.232558	0	0	0	0	0	0	0	0	0	0	0	0	0	0	0	0	0	0.232558	0	0	0	0	0
CIC/07-24	4.045	0	0	0	0	0	0	0	0	0.255102	0.127551	0	0	0	0	0	0	0	0	0	0	0.127551	0	34.8214	0	0	0	0	0	0	0	0	0	0	0	0	0	0	0	0	0.255102	0	0	0	0	0	0	0	0
CIC/07-27	5.11	0.189753	0	0	0	0	0	0	0	0	0.189753	0.379507	0	0	0.189753	0	0	0	0	0	0	0	0	25.6167	0	0	0	0	0	0	0	0	0	0	0	0	0	0	0	0	0	0	0.189753	0	0	0	0	0	0
CIC/07-32	6.14	0.239808	0	0	0	0	0	0	0	0.479616	0.239808	0.239808	0	0	0	0	0	0	0	0	0	0	0	23.2614	0	0	0	0	0	0	0	0	0	0	0	0	0	0	0	0	0	0	0	0	0	0	0	0	0
CIC/07-36	6.98	0.363636	0.545455	0	0	0	0	0	0	0	0	0.181818	0	0	0	0	0	0	0	0	0	0	0.181818	23.0909	0	0	0	0	0	0	0	0	0	0	0	0	0	0	0	0	0	0	0	0	0	0	0	0	0
CIC/07-41	8.07	0.283286	0	0.283286	0	0	0	0	0	0	0	1.41643	0	0	0	0	0	0	0	0	0	0	1.13314	42.4929	0	0	0	0	0	0	0	0	0	0	0	0	0	0	0	0	0	0	0	0	0	0	0	0	0
CIC/07-42	8.13	0	0.19084	0	0	0.19084	0	0	0	0	0	0	0	0	0	0	0	0	0	0	0	0	0	18.7023	0	0	0	0	0	0	0	0	0	0	0	0	0	0	0	0	0	0	0	0	0	0	0	0	0
CIC/07-43	8.33	0	0	0	0	0	0	0	0	0	0	0	0	0	0	0	0	0	0	0	0	0	1.07066	37.9015	0	0	0	0	0	0	0	0.214133	0	0	0	0	0	0	0	0	0	0	0	0	0	0	0	0	0
CIC/07-44	8.51	0.248139	0.248139	0	0	0	0	0	0	0	0	0.248139	0	0	0	0	0	0	0	0	0	0	0	17.3697	0	0	0	0	0	0	0	0	0	0	0	0	0	0	0	0	0	0	0	0	0	0	0	0	0
CIC/07-45	8.75	0.230947	0	0	0	0	0	0	0	0		0.461894	0	0	0	0	0	0	0	0		0	0	34.642	0	0	0	0	0	0	0	0.230947	0	0	0	0	0	0	0	0	0	0	0	0	0	0	0	0	0
CIC/07-47	9.11	0.149254	0	0	0	0	0	0	0	0.447761	0	0.149254	0	0	0	0	0	0	0	0	0	0.149254	1.64179	30.4478	0	0.149254	0	0	0	0	0	0	0	0	0	0	0	0	0	0	0.447761	0	0	0	0	0	0	0	0
CIC/07-52	10.01	0	0	0	0	0	0	0	0	0	0	0	0	0	0	0	0	0	0	0	0	0.201207	0.804829	27.5654	0	0	0	0	0	0	0	0.804829	0	0	0	0	0	0	0	0	0		0	0.201207	0	0	0	0	0
CIC/07-58	11	0.143472	0.143472	0	0	0	0	0	0	0.286944	0.143472	0	0.143472	0	0.143472	0	0	0	0	0	0	0	0.143472	22.0947	0	0	0	0	0	0	0	0	0	0	0	0	0	0	0	0	0.143472	0.143472	0	0	0	0	0	0	0
CIC/07-65	12.15	0.17331	0	0.17331	0	0	0	0	0	0.17331	0	0	0	0	0.17331	0	0	0	0	0	0	0	0.34662	30.6759	0	0.17331	0.17331	0	0	0	0	0.17331	0	0	0	0	0	0	0	0	0.17331	0.34662	0	0	0	0	0	0	0
CIC/07-71	13	0.490196	0	0	0	0	0	0	0.245098	0.245098		0.245098	0	0	0	0	0	0	0	0	0	0	0.490196	38.4804	0	0	0	0	0	0	0	0.490196	0	0	0	0	0.245098	0	0	0	0	1.22549	0	0	0	0	0	0	0
CIC/07-77	14.1	0	0	0	0	0	0	0	0	0	0	0.258398	0	0	0	0	0	0	0	0	0	0	0	34.6253	0	0	0	0	0	0	0	0.516796	0	0	0	0	0.258398	0	0	0	0.516796	0.516796	0	0	0	0	0	0	0
CIC/07-79	14.52	0	0	0	0	0	0	0	0.252525	0	0	0	0	0	0	0	0	0	0	0	0	0	0.252525	26.7677	0	0	0	0	0	0	0	0	0	0	0	0	0	0	0	0	0	0.757576	0	0	0	0	0	0	0
CIC/07-82	14.92	0	0	0.443459	0	0	0	0	0	0	0.221729	0	0	0	0.221729	0	0	0	0	0	0	0	0.443459	25.9424	0	0	0	0	0	0	0	0	0	0	0	0	0.221729	0	0	0	0.221729	2.66075	0	0.221729	0	0	0	0	0
CIC/07-88	15.98	0.225225	0	0	0	0	0	0	0	0.225225	0	0.45045	0	0	0	0	0	0	0	0	0	0	0.225225	25.6757	0	0	0	0	0	0	0	0	0	0	0	0	0	0	0	0	0	1.12613	0	0	0	0	0	0	0
CIC/07-94	16.95	0.205761	0.205761	0	0	0	0	0	0	0	0.205761	0.205761	0	0	0.205761	0	0	0	0	0	0	0		23.251	0	0.205761	0	0	0	0	0	0.205761	0	0	0	0	0.205761	0	0	0	0.411523	0.823045	0	0	0	0	0	0	0
CIC/07-99	18	0.226757	0	0	0	0	0	0	0	0.226757	0	0	0	0	0	0	0	0	0	0	0	0.453515		26.3039	0	0	0	0	0	0	0	0.226757	0	0	0	0	0	0	0	0	0	1.36054	0	0	0	0	0	0	0
CIC/07-105	18.52	0	0	0.253807	0	0	0	0	0	0		0.253807	0	0	0.253807	0	0	0	0	0	0	0	0.507614	24.8731	0	0	0	0	0	0	0	0	0	0	0	0	0	0	0	0	0	0.253807	0	0	0	0	0	0	0
CIC/07-108	19	0	0	0	0	0	0	0	0	0.196078			0	0		0	0	0	0	0	0	0	0.196078	30.1961	0	0	0	0	0	0	0	0.196078	0	0	0	0	0.196078	0	0	0	0	0.392157	0	0	0	0	0	0	0
CIC/07-113	20	0.199601	0	0	0	0	0	0	0.199601	0	0	0	0	0	0	0	0	0	0	0	0	0	0.399202	28.7425	0	0	0	0	0	0	0	0	0	0	0	0	0.598802	0	0	0	0	0.399202	0	0	0	0	0	0	0
CIC/07-122	20.99	0	0	0	0	0	0	0	0.294118	0.294118	0	0	0	0	0	0	0	0	0	0	0	0	0	17.6471	0	0	0	0	0	0	0	0	0	0	0	0	0	0	0	0	0	2.64706	0	0	0	0	0	0	0
CIC/07-127	22	0	0	0	0	0	0	0	0	0	0	0	0	0	0	0	0	0	0	0	0	0	0	23.8411	0	0	0	0	0	0	0	0.220751	0	0	0	0	0	0	0	0	0	0.883002	0	0	0	0	0	0	0
CIC/07-133	23		0	0	0	0.230415	0	0	0	0.230415	0	0	0	0		0	0	0	0	0	0	0		25.576	0	0	0	0	0	0	0	0.230415	0	0	0	0	0.230415	0	0	0	0	0.230415	0	0	0	0	0	0	0
CIC/07-138	24	0.653595	0	0	0	0	0	0	0	0	0	0	0	0	0	0	0	0	0	0	0	0	0.217865	28.3224	0	0	0	0	0	0	0	0	0	0	0	0	0	0	0	0	0.217865	0.217865	0	0.217865	0	0	0	0	0
CIC/07-143	25	0.20202	0	0	0	0	0	0	0	0		0	0	0	0	0	0	0	0	0	0	0	0	28.2828	0	0	0	0	0	0	0	0	0	0	0	0	0	0	0	0	0	0.606061	0	0	0	0	0	0	0
CIC/07-148	26	0.206186	0	0	0	0	0	0	0	0.206186	0		0	0	0.206186	0	0	0	0	0	0	0	0.618557	28.2474	0	0	0	0	0	0	0	0	0	0	0	0	0	0	0	0	0	0.206186	0	0	0	0	0	0	0
CIC/07-153	27	0	0	0	0	0	0	0	0.229358	0.229358	0	0	0	0	0	0	0	0	0	0	0	0	0	16.2844	0	0.229358	0	0	0	0	0	0	0	0	0	0	0.229358	0	0	0	0	1.37615	0	0	0	0	0	0	0
CIC/07-158	28	0	0	0	0	0	0	0	0.441501	0		1.10375	0	0	0	0	0	0	0	0	0	0	0	31.3466	0	0	0	0	0	0	0	0	0	0	0	0	0.220751	0	0	0	0	0.220751	0	0	0	0	0	0	0
CIC/07-162	28.7	0	0	0	0	0.879765	0	0	0	0	0	0.58651	0	0	0	0	0	0	0	0	0	0	0.58651	37.8299	0	0	0	0	0	0	0	0	0	0	0	0	0	0	0	0	0	2.05279	0	0.58651	0	0	0	0	0
CIC/07-163	28.75	#DIV/0!	#DIV/0!	#DIV/0!	#DIV/0!	#DIV/0!	#DIV/0!	#DIV/0!	#DIV/0!	#DIV/0!	#DIV/0!	#DIV/0!	#DIV/0!	#DIV/0!	#DIV/0!	#DIV/0!	#DIV/0!	#DIV/0!	#DIV/0!	#DIV/0!	#DIV/0!	#DIV/0!	#DIV/0!	#DIV/0!	#DIV/0!	#DIV/0!	#DIV/0!	#DIV/0!	#DIV/0!	#DIV/0!	#DIV/0!	#DIV/0!	#DIV/0!	#DIV/0!	#DIV/0!	#DIV/0!	#DIV/0!	#DIV/0!	#DIV/0!	#DIV/0!	#DIV/0!	#DIV/0!	#DIV/0!	#DIV/0!	#DIV/0!	#DIV/0!	#DIV/0!	#DIV/0!	#DIV/0!
CIC/07-164	28.8	#DIV/0!	#DIV/0!	#DIV/0!	#DIV/0!	#DIV/0!	#DIV/0!	#DIV/0!	#DIV/0!	#DIV/0!	#DIV/0!	#DIV/0!	#DIV/0!	#DIV/0!	#DIV/0!	#DIV/0!	#DIV/0!	#DIV/0!	#DIV/0!	#DIV/0!	#DIV/0!	#DIV/0!	#DIV/0!	#DIV/0!	#DIV/0!	#DIV/0!	#DIV/0!	#DIV/0!	#DIV/0!	#DIV/0!	#DIV/0!	#DIV/0!	#DIV/0!	#DIV/0!	#DIV/0!	#DIV/0!	#DIV/0!	#DIV/0!	#DIV/0!	#DIV/0!	#DIV/0!	#DIV/0!	#DIV/0!	#DIV/0!	#DIV/0!	#DIV/0!	#DIV/0!	#DIV/0!	#DIV/0!
CIC/07-165	28.85	0	0	0	0	0	0	0	0	0	0	9.52381	0	0	0	0	0	0	0	0	0	0	0	28.5714	0	0	0	0	0	0	0	0	0	0	0	0	4.7619	0	0	0	0	0	0	0	0	0	0	0	0
CIC/07-166	28.9	0	0	0	0.31746	0.31746	0	0	0	0	0	0	0	0	0.31746	0	0	0	0	0	0	0	0.952381	21.5873	0	0	0	0	0	0	0.31746	0.31746	0	0		0	0.634921	0	0	0	1.26984	7.93651	0	0	0	0	0	0	0
CIC/07-167	28.95	0	0	0	0	0	0	0	0	0	0	0	0	0	0	0	0	0	0	0	0	0	0	26.6667	0	0	0	2.22222	0	0	0	0	0	0	0	0	0	0	0	0	0	4.44444	0	0	0	0	2.22222	0	0
CIC/07-168	29	0	0	0	0	0	0	0	0	0	0	0	0	0	0	0	0	0	0	0	0	0	0.27248	52.5886	0	0	0	0	0	0	0	0	0	0	0	0	0.544959	0	0	0	0	0.27248	0	0.27248	0	0	0	0	0
CIC/07-171	29.15	0.617284	0	0	0.925926	0.308642	0	0	0	0	0	0.617284	0	0	0	0	0	0	0	0	0	0	1.54321	44.1358	0	0	0	0	0	0	0	0	0	0	0	0	0	0	0	0	0	0.308642	0	0	0	0	0	0	0
CIC/07-172	29.2	0	0.262467	0	0	0.262467	0	0	0	0	0	0.524934	0	0	0	0	0	0	0	0	0	0	1.04987	39.1076	0	0	0	0	0	0	0	0	0	0	0	0	0.524934	0	0	0	0.262467	1.31234	0	0.524934	0	0	0	0	0
CIC/07-173	29.25	0	0	0	0	0.205761	0	0	0	0	0	0.205761	0	0	0	0	0	0	0	0	0	0	1.64609	29.0123	0	0	0	0	0	0	0	0	0	0	0	0	0	0	0	0	0.205761	0.823045	0	0	0	0	0.205761	0	0
CIC/07-175	29.4	0.290698	0.290698	0	0.290698	0.290698	0	0	0	0	0	0	0	0	0	0	0	0	0	0	0	0	2.61628	36.3372	0	0.290698	0	0	1.74419	0	0	0	0	0	0	0	0	0	0	0	0	0.872093	0	0	0	0	0	0	0
CIC/07-181	30	0.210084	0	0	0	0	0	0	0	0	0	0.210084	0	0	0	0	0	0	0	0	0	0	0.630252	32.9832	0	0	0	0	0.630252	0	0	0	0	0	0	0	0.420168	0	0	0	0	0.840336	0	0	0	0	0	0	0
CIC/07-191	31	0	0	0	0	0	0	0	0	0.230415	0	0	0	0	0	0	0	0	0	0	0	0	2.07373	34.5622	0	0	0	0.230415	0.691244	0	0	0.230415	0	0	0	0	0	0	0	0	0	2.30415	0	0	0	0	0.230415	0	0
CIC/07-198	31.7	0	0	0	0	0	0	0	0.184162	0.184162	0	0.184162	0	0	0	0	0	0	0	0	0	0	1.28913	30.0184	0	0.184162	0	0	0	0		0	0	0	0	0	0	0	0	0	0.184162	0.92081	0	0	0	0	0	0	0
CIC/07-201	32.03	0	0	0	0	0	0	0	0	0	0	0	0	0	0	0	0	0	0	0	0	0	1.02564	41.5385	0	0	0	0	0.25641	0	0	0.25641	0	0	0	0	0.25641	0	0	0	0.769231	1.53846	0	0.25641	0	0	0	0	0
CIC/07-211	33	0	0	0	0	0	0.170648	0	0	0.170648	0	0.170648	0	0	0	0.170648	0	0	0	0	0	0	0.341297	20.1365	0	0	0	0	0	0	0	0.170648	0	0	0	0	0.170648	0	0	0	0	0.170648	0	0	0	0	0	0	0
CIC/07-222	34.03	0	0.233645	0	0	0	0	0	0	0	0	0.233645	0	0	0	0	0	0	0	0		0	0.233645	28.972	0	0	0	0	0	0	0	0	0	0	0	0	0	0	0	0	0.46729	0.46729	0	0	0	0	0	0	0
CIC/07-228	35.02	0.18797	0.18797	0	0	0	0	0	0	0.18797	0	0.18797	0	0	0	0	0	0	0	0	0	0	0.18797	32.8947	0	0	0	0	0	0	0	0	0	0	0	0	0	0	0	0	0.18797	0.18797	0	0.18797	0	0	0.75188	0	0
CIC/07-238	36.13	0	0	0	0	0	0	0		0.176991	0	0.353982	0	0		0	0	0	0	0	0	0	0.707965	22.1239	0	0	0	0	0	0	0	0	0	0	0	0	0	0	0	0	0	1.23894	0	0.353982	0	0	0.176991	0	0
CIC/07-247	37.09	0	0	0	0	0	0	0	0	0	0	0.219298	0	0		0	0	0	0	0	0.219298	0	0.219298	25.2193	0.219298	0	0.219298	0	0	0	0	0	0	0	0	0	0.219298	0	0	0	0	0.657895	0	0	0	0	0	0	0
CIC/07-257	38.02	0		0		0		0	0	0	0		0	0		0	0	0	0	0	0	0	0.4158	21.6216	0	0	0	0	0	0	0	0	0	0		0	0.2079	0	0	0	0.2079	0.831601	0	0	0	0	0	0	0
CIC/07-269	39.03	0	0.428266	0.214133	0	0.214133	0	0	0.214133	0.214133	0	0.214133	0	0	0.214133	0	0	0	0	0	0	0.214133	0.642398	18.6296	0	0	0	0	0	0	0	0	0	0	0	0	0.214133	0	0	0		0.214133	0	0.214133	0	0	1.07066	0	0
CIC/07-277	40	0	0	0	0	0	0	0	0	0	0	0	0	0	0.204082	0	0	0	0	0	0	0	0	14.2857	0	0	0.204082	0	0	0	0	0	0	0	0	0	0	0	0	0	0	0	0	0	0	0	0.408163	0	0
CIC/07-282	41	0	0	0	0		0.184162	0	0.184162	0	0	0	0	0		0	0	0	0	0	0		0.184162	9.57643	0	0	0	0	0	0	0.368324	0	0	0	0	0.368324	0.552486	0	0	0	0	0.736648	0	0.184162	0.184162	0	0.368324	0	0
CIC/07-288	42	0	0.222717	0.222717	0		0	0	0.445434	0.222717	0		0	0	0	0	0	0	0	0	0	0.222717	0.222717	16.7038	0	0	0	0	0	0	0	0	0	0.222717	0	0	0.222717	0	0	0	0	0.222717	0	0	0	0	0.222717	0	0
CIC/07-293	43	0.459418	0	0	0	0	0	0	0	0.153139		0	0	0	0	0	0	0	0	0.153139	0.153139	0	0.306279	11.026	0		0	0	0	0	0	0	0	0.459418	0	0	0	0	0	0	0.306279	0.459418	0	0	0	0	0.612557	0	0
CIC/07-299	44	0	0.186916	0	0	0	0	0	0.186916	0	0	0	0	0	0.186916	0	0	0	0	0	0	0	0	18.8785	0	0	0	0	0	0	0.373832	0	0.186916	0	0	0	0	0	0	0	0	0.373832	0	0	0	0	1.86916	0	0
CIC/07-304	45	0.199203	0	0	0	0	0	0	0.796813	0	0	0.199203	0	0	0.199203	0	0	0	0	0	0	0.199203	0.398406	16.1355	0	0	0	0	0	0	0	0	0	0	0	0.199203	0.199203	0	0	0	0	0.199203	0	0	0	0	0.59761	0	0
CIC/07-309	46	0	0.442478	0	0	0	0	0	0	0	0.221239	0	0	0	0.221239	0	0	0	0	0	0	0.221239	0.663717	11.7257	0	0	0	0	0	0	0.221239	0	0	0	0	0	0.221239	0	0	0	0	0	0	0.221239	0	0	0.884956	0	0
CIC/07-314	47	0		0	0.191571	0	0	0	0.191571	0.191571	0	0.574713	0	0	0	0	0	0	0	0	0	0	0.383142	22.4138	0	0	0	0	0	0	0.383142	0	0.574713	0.191571		0.191571	0.383142	0	0	0	0	0.383142	0	0	0	0	0.383142	0	0
CIC/07-319	48	0	0	0	0	0.180832	0	0	0.361664	0.180832	0	0	0	0	0	0	0.180832	0	0	0	0	0	0.361664	26.9439	0	0	0	0	0	0	0.180832	0	0.723327	0	0.542495	0.723327	0.180832	0	0	0	0	0.180832	0	0	0.180832	0	0.904159	0	0.361664
CIC/07-324	49	0.28169	0.28169	0	0	0	0	0	0	0	0	0.84507	0	0	0	0	0	0	0	0	0	0	0	19.1549	0	0	0	0	0	0	0.28169	0	0	0	0	0	0.56338	0	0	0	0	0	0		0	0	1.12676	0	0
CIC/07-329	50	0	0	0	0	0.224719	0	0	0.224719	0	0	0.449438	0	0	0.224719	0.224719	0	0	0	0	0	0.224719	0.674157	21.1236	0	0	0	0	0	0	0	0	0.224719	0	0	0	0	0	0	0	0	0	0	0	0	0	0.674157	0	0
CIC/07-334	51	0	0	0	0	0.204082	0	0	0.204082	0.204082	0.408163	0.612245	0	0	0	0	0	0	0	0.204082	0	0	1.02041	18.3673	0	0	0	0	0	0	0.612245	0	0.204082	0	0	0.408163	0	0	0	0	0.204082	0	0	0	0	0	0.204082	0	0
CIC/07-339	52	0	0	0	0	0	0	0	0	0.238663	0.238663	1.19332	0	0	0.238663	0	0	0	0	0	0	0	1.67064	10.0239	0	0	0	0	0	0	0.238663	0	0.238663	0	0	0.477327	0	0	0	0	0	0	0	0	0	0	0.954654	0	0
CIC/07-344	53	0	0	0	0	0	0	0	0.18622	0.18622	0	1.11732	0	0	0	0	0	0	0	0	0	0.18622	0.372439	11.7318	0	0	0	0	0	0	0.558659	0	0.18622	0	0	0	0	0	0	0	0	0	0	0	0.18622	0.18622	0.558659	0	0
CIC/07-350	53.9	0.204082	0	0	0	0	0	0	0.816327	0.408163	0	0.612245	0	0	0.204082	0	0	0	0.408163	0	0	0.408163	0	12.6531	0	0	0	0	0	0.204082	0.408163	0	0.204082	0.408163	0.816327	0	0	0	0	0	0	0	0	0	0	0	0.408163	0	0
CIC/07-349	54	0	0	0.232019	0	0	0.232019	0	0.232019	0.232019	0	0.696056	0	0	0	0	0	0	0	0	0	0	1.85615	14.8492	0	0	0	0	0	0	0	0	0.696056	0		0	0.464037	0	0	0	0	0.232019	0	0.232019	0	0.232019	1.62413	0	0
CIC/07-351	54.1	0.17762	0	0	0	0.17762	0	0.17762	0.17762	0.53286	0		0	0	0	0.17762	0	0	0	0	0	0.17762	0.888099	14.2096	0	0	0	0	0	0	0.35524	0	0.17762	0	0.53286	0.53286	0	0	0	0	0	0.17762	0	0.35524	0	0.17762	0.53286	0	0
CIC/07-352	54.2	0	0	0	0	0	0.222222	0	0	0.222222	0	0.666667	0	0	0	0.222222	0	0	0	0	0	0	1.33333	20.8889	0	0	0	0	0	0	0.666667	0	0.666667	0.222222	0.222222	0.444444	0	0	0	0	0	0	0	0	0	0	0.666667	0	0
CIC/07-353	54.3	0	0	0	0	0.17452	0.52356	0	0.52356	0	0	1.39616	0	0	0	0	0	0	0	0	0	0.17452	1.39616	17.2775	0	0	0	0	0		1.7452	0	0	0.17452	0.34904	0	0.17452	0	0	0	0.17452	0	0	0.34904	0	0	0.69808	0	0
CIC/07-354	54.4	0	0	0	0.18797	0.18797	0	0	0.18797	0	0	0.75188	0	0	0.18797	0	0	0	0.18797	0	0.37594	0	0.56391	12.218	0	0	0.18797	0	0	0	0.56391	0	1.69173	0	0	0	0	0	0	0	0.18797	0	0	0.37594	0	0	0.18797	0	0
CIC/07-355	54.5	0	0	0	0.215517	0.431034	0	0	0	0.646552	0	0.646552	0	0	0	0.431034	0	0	0	0	0	0.215517	2.15517	12.7155	0	0	0	0	0	0	0.215517	0	0	0	0	0	0.215517		0	0	0	0	0	0.215517	0	0	0.646552	0	0
CIC/07-356	54.6	0	0	0	0	0	0	0	0.255102	0	0	1.27551	0	0	0	0	0	0	0	0.255102	0	0	1.78571	14.2857	0	0	0	0	0	0	1.02041	0	0.510204	0	0.510204	0.255102	0	0	0	0	0.255102	0	0	0.255102	0.255102	0	0	0	0
CIC/07-357	54.7	0	0	0	0	0	0.257069	0	0	0.257069	0	1.54242	0	0	0	0.257069	0.257069	0	0	0	0	0	1.79949	15.1671	0	0	0	0	0	0	0.771208	0	0	0	0.514139	0	0	0	0	0	0	0	0	0	0	0	0.514139	0	0
CIC/07-358	54.8	0	0	0	0.28169	0	0.28169	0	0.28169	0.56338	0	1.40845	0	0	0	0	0.28169	0	0	0	0	0	1.69014	12.6761	0	0	0.28169	0	0	0	0.56338	0	0.84507	0.28169	1.40845	0.28169	0		0	0	0	0	0	0	0	0	0	0	0
CIC/07-359	54.9	0	0.235294	0	0.235294	0.235294	0	0	0.470588	0.235294	0	0.470588	0	0	0	0	0	0	0	0	0	0	1.88235	8.70588	0	0	0	0	0	0	0.941176	0	0	0	0.705882	0.235294	0	0	0	0	0.235294	0	0	0	0	0	0.941176	0	0
CIC/07-361	55.1	0.196078	0	0	0	0.196078	0	0	0	0.588235	0	0	0.392157	0	0	0	0	0	0	0	0	0	0.784314	7.64706	0	0	0	0	0	0	0.196078	0	0.392157	0.392157	0.980392	0	0	0	0	0	0	0	0	0	0	0	0.588235	0	0
CIC/07-367	56.1	0	0	0	0	0.25	0.25	0	0.75	0.5	0	0	0	0	0	0	0	0	0	0	0	0.25	1	19.5	0	0	0	0	0		0.25	0	0.25	0	0.75	0.25	0	0	0	0	0	0	0	0.25	0	0	0.25	0	0
CIC/07-372	57.1	0	0	0	0	1.23762	0	0	0	0.247525	0	2.22772	0	0	0	0	0	0	0	0	0	0	0.990099	12.3762	0	0	0	0	0	0	0.990099	0	0.742574	0	0.742574	0.247525	0.247525	0	0	0	0	0.247525	0	0.247525	0.247525	0	0.49505	0	0
CIC/07-377	58.1	0.191205	0	0	0	0	0	0	0	0.191205	0	0.191205	0	0	0	0	0	0	0	0	0	0	1.33843	10.8987	0	0	0	0	0	0	0.191205	0	0.191205	0	0	0.191205	0.191205	0	0	0	0	0.573614	0	0.191205	0	0	0.191205	0	0
CIC/07-382	59.1	0.237812	0	0	0	0	0	0	0.237812	0.713436	0	0.237812	0	0	0	0	0	0	0.118906	0	0	0.118906	0.59453	6.77765	0	0	0	0	0	0	0.118906	0	0.118906	0.118906	0.237812	0	0	0	0	0	0	0	0.237812	0	0	0	0.237812	0	0
CIC/07-387	60.1	0	0	0	0	0.952381	0	0	0	0.571429	0	0	0	0		0	0	0	0	0	0.190476	0	1.33333	9.33333	0	0	0	0	0	0	0.380952	0	0.190476	0	1.52381	0.380952	0	0	0	0	0	0.190476	0	0	0	0	0.380952	0	0
CIC/07-389	60.5	0	0	0	0	0		0	0	0.588235	0	1.17647	0	0	0	0	0		1.17647		0	0	0.588235	15.2941	0	0	0	0	0	0	0	0	0	0	0.294118	0	0		0	0		0	0	0	0	0	0.294118	0	0
CIC/07-392	61.1	0	0	0	0	0.197628	0	0	0	0	0	0.197628	0	0		0.197628	0	0	0	0	0	0	0	8.10277	0	0	0	0	0	0	0.592885	0	0.197628	0	0.197628	0	0		0	0	0	0	0	0	0	0	0.790514	0	0
CIC/07-393	61.3	0	0	0	0	0	0	0	0.361011	0.361011	0	1.08303	0	0	0	0	0	0	0.722022	0.722022	0.722022	0	1.08303	15.1625	0	0	0	0	0	0	1.44404	0	1.44404	0	2.52708	0	0	0	0	0	0	0	0	0	0	0	0	0	0
CIC/07-395	61.7	0	0	0	0	0.269542	0	0	0.269542	0.539084	0	1.88679	0	0.269542	0.539084	0	0	0	0.539084	0	0	0	1.07817	10.2426	0.269542	0	0	0	0	0	0.808625	0	0.808625	0	2.15633	0	0	0	0	0	0	0	0	0	0	0	0.269542	0	0
CIC/07-397	62.1	0.240385	0.240385	0	0	0	0	0	0.240385	0.240385	0	0.480769	0	0	0	0.240385	0	0	0	0	0	0	0.721154	9.13462	0	0	0	0	0	0	0.721154	0	0.240385	0	0.480769	0	0	0	0	0	0		0	0	0	0	0	0	0
CIC/07-402	63.1	0	0.215517	0	0	0	0.215517	0	0	1.07759	0	0.431034	0	0	0.215517	0.215517	0	0	0	0	0	0	1.07759	10.5603	0	0	0	0	0	0	0.646552	0	0	0	0	0	0	0	0	0	0	0	0	0.646552	0	0	0.431034	0	0
CIC/07-407	64	0	0.504202	0	0	0	0.336134	0	0.168067	0.168067	0	0.504202	0	0	0	0	0	0	0.168067	0	0	0.168067	1.0084	4.36975	0	0	0	0	0	0	0.504202	0	0	0.168067	0.504202	0	0	0	0	0	0	0	0	0	0	0	0.504202	0.168067	0
CIC/07-412	65	0	0	0	0	0	0	0	0.479616	0.959233		0.719424	0	0	0	0	0	0	0	0		0.239808	1.43885	12.2302	0	0	0	0	0	0	0.479616	0	0	0	0.479616	0.479616	0	0	0	0	0	0	0	0	0	0	0.959233	0	0
CIC/07-417	66	0	0.163399	0	0	0.163399	0	0	0	0.490196	0	0.326797	0	0	0	0.163399	0	0	0	0	0	0	1.14379	7.51634	0	0	0	0	0	0	0.326797	0	0.490196	0.326797	0.980392	0	0	0	0	0	0	0	0	0	0	0	0.653595	0	0
CIC/07-422	67	0	0.323625	0	0	0.323625	0	0	0	0.161812	0	0.323625	0	0	0	0	0	0	0	0	0	0	0.161812	5.82524	0	0	0	0	0	0	1.13269	0	0.161812	0	0.809061	0	0	0	0	0	0.161812	0	0	0	0	0	0	0	0
CIC/07-427	68	0.503778	0.251889	0	0	0.503778	0	0	0	0.755668	0	1.00756	0	0	0	0	0	0.503778	0	0	0		1.25945	8.56423	0	0	0	0	0	0	0.503778	0	0	0	1.25945	0	0	0	0	0	0	0	0	0	0.251889	0	0.503778	0	0
CIC/07-432	69	0	0.847458	0	0	0	0	0	0	0.847458	0	0.635593	0	0	0	0	0	0	0.211864	0	0.211864	0.847458	1.05932	4.66102	0	0	0	0	0	0	0	0	0	0	0.847458	0	0	0	0	0	0	0	0	0	0	0	0	0	0
CIC/07-437	70	0	0.416089	0	0	0.277393	0.138696	0	0	0.277393	0	0.832178	0	0	0	0	0	0	0	0	0	0	0	5.96394	0	0	0	0	0	0	0.554785	0	0.138696	0	0.970874	0	0	0	0	0	0	0	0	0	0.138696	0	0.138696	0	0
CIC/07-442	71	0	0.234742	0	0	0.234742	0.234742	0	0	0.234742	0	0.938967	0	0	0	0	0	0	0.234742	0	0	0.469484	0.469484	11.2676	0	0	0	0	0	0	0	0	0	0	2.58216	0	0	0	0	0	0	0	0	0	0	0	0	0	0
CIC/07-447	72	0	0.393701	0	0	0	0	0	0.393701	0	0.393701	0	0	0.19685	0	0	0	0.393701	0.19685	0.19685	0	0.393701	1.1811	12.0079	0	0	0	0	0	0	1.77165	0	0.19685	0	1.37795	0	0	0	0	0	0	0	0	0	0.19685	0	0	0	0
CIC/07-449	72.4	0	0	0	0	0	0	0	0	0.265252	0	0.530504	0	0		0	0	0.265252	0	0	0.265252	0	0.795756	10.8753	0	0	0	0	0	0	0.530504	0	0	0	3.44828	0	0	0	0	0	0	0	0	0	0	0	0	0	0
CIC/07-450	72.6	0.31348	0	0	0	0	0	0	0.31348	0	0	0.626959	0	0	0.31348	0	0	0	0	0	0	0	0.626959	20.0627	0	0	0	0	0	0	0.626959	0	0	0	4.38871	0	0	0	0	0	0	0	0	0	0	0	0	0	0
CIC/07-451	72.8	0	0.248756	0	0	0	0.746269	0.248756	0	0.248756	0	0.746269	0	0	0	0	0	0.248756	0	0	0	0	0.248756	13.9303	0	0	0	0	0	0	0.248756	0	0.248756	0	2.23881	0	0	0	0	0	0	0	0	0	0	0	0	0	0
CIC/07-451 bis	72.79	0.218341	0	0	0	0.218341	0.873362	0	1.0917	0.218341	0	2.83843	0	0	0	0.436681	0	0	0.218341	0	0	0.218341	0.436681	17.6856	0	0	0	0	0	0	0.218341	0	0.218341	0	2.83843	0	0	0.655022	0	0	0	0	0	0	0	0	0	0	0
CIC/07-452	73.8	0	0	0	0	0.307692	0.307692	0	0	0	0	0	0	0	0	0.307692	0	0.307692	0.307692	0	0	0	0.923077	5.23077	0	0	0	0	0	0	0.923077	0	0	0	2.15385	0	0		0	0	0	0	0	0	0	0	0	0	0
CIC/07-457	74	0	0.201613	0	0	0.403226	0	0	0	0.201613	0	0.604839	0	0	0	0	0	0	0	0	0	0	0.201613	3.83065	0	0	0	0	0	0	0	0	0	0	0.806452	0	0	0	0	0	0	0	0	0	0	0	0	0	0
CIC/07-462	75	0	0	0	0	0.437637	0	0	0	0.218818	0	0	0	0	0	0	0	0	0	0	0	0.218818	0.437637	1.96937	0	0	0	0	0	0	0	0.218818	0	0	0.437637	0	0	0	0	0	0	0	0	0	0	0	0	0	0
CIC/07-467	76	0		0	0		0	0	0	0.19802	0	0.19802	0	0	0	0	0	0.19802	0	0	0	0.19802	0.39604	3.76238	0	0	0	0	0	0	0.19802	0	0	0	0.594059	0	0	0	0	0	0	0	0	0	0	0	0	0	0
CIC/07-472	77	0	0.197628	0	0	0.395257	0	0	0	0.790514	0	0.395257	0	0	0.197628	0	0	0	0.197628	0	0	0	0	5.5336	0	0	0	0	0	0	1.18577	0	0.395257	0	1.58103	0	0	0	0	0	0	0	0	0	0	0.197628	0	0	0
CIC/07-477	78	0	0	0	0	1.44928	0	0	0	0.414079	0	0.207039	0	0	0.207039	0	0	0	0	0	0	0	1.44928	6.62526	0	0	0	0	0	0	0.414079	0	0.207039	0	1.24224	0	0	0	0	0	0	0	0	0	0	0	0	0	0
CIC/07-482	79	0	0.44843	0	0	0	0	0	0	0	0	0	0	0	0.44843	0.224215	0	0	0	0	0	0	1.12108	10.7623	0	0	0	0	0	0	0.44843	0	0	0	2.46637	0	0	0.44843	0	0	0	0	0	0	0	0	0	0	0
CIC/07-487	80	0	0.420168	0	0	0.210084	0	0	0	0	0	0.420168	0	0	0	0	0	0	0	0		0	0.840336	7.56303	0	0	0	0	0	0	0.420168	0	0	0	1.89076	0	0	0	0	0	0	0	0	0	0	0	0	0	0
CIC/07-492	81	0	0	0	0		0	0	0.657895	0.219298		0.657895	0	0.219298	0	0	0	0	0	0	0	0	2.19298	19.9561	0	0	0	0	0	0.219298	0.219298	0	0	0	1.09649	0	0	0.657895	0	0	0	0	0	0	0	0	0	0	0
[truncated: 78 more columns]

## Sheet: % without thoracosphaera
sample	Height (m)	Biantholithusspp.	Biantholithussp.1	Biscutum cf.	Biscutum spp.	Braarudosphaera spp.	Calcidiscus kingii	Calcidiscus cf. kingii (ellittico)	Campylosphaera eodela/dela	Cepekiella lumina	Chiasmolithus californicus (13-21μm)	Chiasmolithus consuetus (5-12μm)	Chiasmolithusconsuetus/C. danicus	Chiasmolithus grandis	Chiasmolithus bidens/C.solitus	Chiasmolithus titus	Chiasmolithusspp.	Chiphragmalithus spp. (circolare)	Chiphragmalithus spp. (ellitico)	Clausicoccus spp.	Coccolithus eopelagicus (16-20μm)	Coccolithus jugatum	Coccolithus miopelagicus (13-16μm)	Coccolithus pelagicus (6-13μm)	Cruciplacolithus latipons	Cruciplacolithus tenuis	Cruciplacolithus sp.1	Discoaster anartios	Discoaster araneus	Discoaster barbadiensis	Discoaster binodosus	Discoaster delicatus	Discoaster diastypus	Discoaster diastypussalisburgensis	Discoaster kuepperi	Discoaster kuepperi/D. salisburgensis	Discoaster lenticularis	Discoaster lodoensis	Discoaster mahmoudii	Discoaster medious	Discoaster mohleri	Discoaster multiradiatus	Discoaster mohleri/D. nobilis gr.	Discoaster nobilis gr.	Discoaster nonaradiatus.	Discoaster robustus	Discoaster salisburgensis	Discoaster tani nodifer	Discoaster splendidus
CIC/07-1	0.09	0.268817	0	0	0	0	0	0	0	0	0	0	0	0	0	0	0.268817	0	0	0	0	0	0	26.8817	0	0	0	0	0	0	0	0	0	0	0	0	0	0	0	0	0.537634	0	0	0	0	0	0	0	0.268817
CIC/07-6	1.07	0.372439	0	0.18622	0	0.18622	0	0	0	0	0	0.744879	0	0	0.18622	0	0	0	0	0	0	0	0.18622	26.4432	0	0	0	0	0	0	0	0.18622	0	0	0	0	0	0	0	0	0.558659	0	0	0	0	0	0	0	0
CIC/07-11	2.095	0	0	0	0	0.174216	0	0	0	0	0	0.522648	0	0	0	0	0	0	0	0	0	0	0.174216	32.7526	0	0.174216	0	0	0	0	0	0	0	0	0	0	0	0	0	0	0.174216	0	0	0	0	0	0	0	0
CIC/07-16	3.265	0	0	0.164745	0	0	0	0	0	0	0	0.329489	0	0	0.164745	0	0	0	0	0	0	0	0	25.8649	0	0.164745	0	0	0	0	0	0	0	0	0	0	0	0	0	0	0.494234	0	0	0.164745	0	0	0	0	0
CIC/07-18	3.51	0	0	0	0	0	0	0	0	0	0.271739	0.271739	0	0	0.271739	0	0	0	0	0	0	0	0.543478	26.6304	0		0	0	0	0	0	0	0	0	0	0	0	0	0	0	0.271739	0	0	0	0	0	0	0	0
CIC/07-20	3.655	0	0	0	0	0	0	0	0	0	0	0.49505	0	0	0	0	0	0	0	0	0	0	0	31.4356	0	0.247525	0	0	0	0	0	0	0	0	0	0	0	0	0	0	0	0	0	0.247525	0	0	0	0	0
CIC/07-24	4.045	0	0	0	0	0	0	0	0	0.264901	0.13245	0	0	0	0	0	0	0	0	0	0	0.13245	0	36.1589	0	0	0	0	0	0	0	0	0	0	0	0	0	0	0	0	0.264901	0	0	0	0	0	0	0	0
CIC/07-27	5.11	0.208333	0	0	0	0	0	0	0	0	0.208333	0.416667	0	0	0.208333	0	0	0	0	0	0	0	0	28.125	0	0	0	0	0	0	0	0	0	0	0	0	0	0	0	0	0	0	0.208333	0	0	0	0	0	0
CIC/07-32	6.14	0.253807	0	0	0	0	0	0	0	0.507614	0.253807	0.253807	0	0	0	0	0	0	0	0	0	0	0	24.6193	0	0	0	0	0	0	0	0	0	0	0	0	0	0	0	0	0	0	0	0	0	0	0	0	0
CIC/07-36	6.98	0.410678	0.616016	0	0	0	0	0	0	0	0	0.205339	0	0	0	0	0	0	0	0	0	0	0.205339	26.078	0	0	0	0	0	0	0	0	0	0	0	0	0	0	0	0	0	0	0	0	0	0	0	0	0
CIC/07-41	8.07	0.287356	0	0.287356	0	0	0	0	0	0	0	1.43678	0	0	0	0	0	0	0	0	0	0	1.14943	43.1034	0	0	0	0	0	0	0	0	0	0	0	0	0	0	0	0	0	0	0	0	0	0	0	0	0
CIC/07-42	8.13	0	0.243902	0	0	0.243902	0	0	0	0	0	0	0	0	0	0	0	0	0	0	0	0	0	23.9024	0	0	0	0	0	0	0	0	0	0	0	0	0	0	0	0	0	0	0	0	0	0	0	0	0
CIC/07-43	8.33	0	0	0	0	0	0	0	0	0	0	0	0	0	0	0	0	0	0	0	0	0	1.20482	42.6506	0	0	0	0	0	0	0	0.240964	0	0	0	0	0	0	0	0	0	0	0	0	0	0	0	0	0
CIC/07-44	8.51	0.310559	0.310559	0	0	0	0	0	0	0	0	0.310559	0	0	0	0	0	0	0	0	0	0	0	21.7391	0	0	0	0	0	0	0	0	0	0	0	0	0	0	0	0	0	0	0	0	0	0	0	0	0
CIC/07-45	8.75	0.265957	0	0	0	0	0	0	0	0		0.531915	0	0	0	0	0	0	0	0		0	0	39.8936	0	0	0	0	0	0	0	0.265957	0	0	0	0	0	0	0	0	0	0	0	0	0	0	0	0	0
CIC/07-47	9.11	0.153846	0	0	0	0	0	0	0	0.461538	0	0.153846	0	0	0	0	0	0	0	0	0	0.153846	1.69231	31.3846	0	0.153846	0	0	0	0	0	0	0	0	0	0	0	0	0	0	0.461538	0	0	0	0	0	0	0	0
CIC/07-52	10.01	0	0	0	0	0	0	0	0	0	0	0	0	0	0	0	0	0	0	0	0	0.207039	0.828157	28.3644	0	0	0	0	0	0	0	0.828157	0	0	0	0	0	0	0	0	0		0	0.207039	0	0	0	0	0
CIC/07-58	11	0.15949	0.15949	0	0	0	0	0	0	0.318979	0.15949	0	0.15949	0	0.15949	0	0	0	0	0	0	0	0.15949	24.5614	0	0	0	0	0	0	0	0	0	0	0	0	0	0	0	0	0.15949	0.15949	0	0	0	0	0	0	0
CIC/07-65	12.15	0.178891	0	0.178891	0	0	0	0	0	0.178891	0	0	0	0	0.178891	0	0	0	0	0	0	0	0.357782	31.6637	0	0.178891	0.178891	0	0	0	0	0.178891	0	0	0	0	0	0	0	0	0.178891	0.357782	0	0	0	0	0	0	0
CIC/07-71	13	0.520833	0	0	0	0	0	0	0.260417	0.260417		0.260417	0	0	0	0	0	0	0	0	0	0	0.520833	40.8854	0	0	0	0	0	0	0	0.520833	0	0	0	0	0.260417	0	0	0	0	1.30208	0	0	0	0	0	0	0
CIC/07-77	14.1	0	0	0	0	0	0	0	0	0	0	0.275482	0	0	0	0	0	0	0	0	0	0	0	36.9146	0	0	0	0	0	0	0	0.550964	0	0	0	0	0.275482	0	0	0	0.550964	0.550964	0	0	0	0	0	0	0
CIC/07-79	14.52	0	0	0	0	0	0	0	0.265252	0	0	0	0	0	0	0	0	0	0	0	0	0	0.265252	28.1167	0	0	0	0	0	0	0	0	0	0	0	0	0	0	0	0	0	0.795756	0	0	0	0	0	0	0
CIC/07-82	14.92	0	0	0.498753	0	0	0	0	0	0	0.249377	0	0	0	0.249377	0	0	0	0	0	0	0	0.498753	29.1771	0	0	0	0	0	0	0	0	0	0	0	0	0.249377	0	0	0	0.249377	2.99252	0	0.249377	0	0	0	0	0
CIC/07-88	15.98	0.273224	0	0	0	0	0	0	0	0.273224	0	0.546448	0	0	0	0	0	0	0	0	0	0	0.273224	31.1475	0	0	0	0	0	0	0	0	0	0	0	0	0	0	0	0	0	1.36612	0	0	0	0	0	0	0
CIC/07-94	16.95	0.25	0.25	0	0	0	0	0	0	0	0.25	0.25	0	0	0.25	0	0	0	0	0	0	0		28.25	0	0.25	0	0	0	0	0	0.25	0	0	0	0	0.25	0	0	0	0.5	1	0	0	0	0	0	0	0
CIC/07-99	18	0.243309	0	0	0	0	0	0	0	0.243309	0	0	0	0	0	0	0	0	0	0	0	0.486618		28.2238	0	0	0	0	0	0	0	0.243309	0	0	0	0	0	0	0	0	0	1.45985	0	0	0	0	0	0	0
CIC/07-105	18.52	0	0	0.260417	0	0	0	0	0	0		0.260417	0	0	0.260417	0	0	0	0	0	0	0	0.520833	25.5208	0	0	0	0	0	0	0	0	0	0	0	0	0	0	0	0	0	0.260417	0	0	0	0	0	0	0
CIC/07-108	19	0	0	0	0	0	0	0	0	0.204918			0	0		0	0	0	0	0	0	0	0.204918	31.5574	0	0	0	0	0	0	0	0.204918	0	0	0	0	0.204918	0	0	0	0	0.409836	0	0	0	0	0	0	0
CIC/07-113	20	0.20202	0	0	0	0	0	0	0.20202	0	0	0	0	0	0	0	0	0	0	0	0	0	0.40404	29.0909	0	0	0	0	0	0	0	0	0	0	0	0	0.606061	0	0	0	0	0.40404	0	0	0	0	0	0	0
CIC/07-122	20.99	0	0	0	0	0	0	0	0.310559	0.310559	0	0	0	0	0	0	0	0	0	0	0	0	0	18.6335	0	0	0	0	0	0	0	0	0	0	0	0	0	0	0	0	0	2.79503	0	0	0	0	0	0	0
CIC/07-127	22	0	0	0	0	0	0	0	0	0	0	0	0	0	0	0	0	0	0	0	0	0	0	24.8276	0	0	0	0	0	0	0	0.229885	0	0	0	0	0	0	0	0	0	0.91954	0	0	0	0	0	0	0
CIC/07-133	23		0	0	0	0.238663	0	0	0	0.238663	0	0	0	0		0	0	0	0	0	0	0		26.4916	0	0	0	0	0	0	0	0.238663	0	0	0	0	0.238663	0	0	0	0	0.238663	0	0	0	0	0	0	0
CIC/07-138	24	0.665188	0	0	0	0	0	0	0	0	0	0	0	0	0	0	0	0	0	0	0	0	0.221729	28.8248	0	0	0	0	0	0	0	0	0	0	0	0	0	0	0	0	0.221729	0.221729	0	0.221729	0	0	0	0	0
CIC/07-143	25	0.205339	0	0	0	0	0	0	0	0		0	0	0	0	0	0	0	0	0	0	0	0	28.7474	0	0	0	0	0	0	0	0	0	0	0	0	0	0	0	0	0	0.616016	0	0	0	0	0	0	0
CIC/07-148	26	0.226244	0	0	0	0	0	0	0	0.226244	0		0	0	0.226244	0	0	0	0	0	0	0	0.678733	30.9955	0	0	0	0	0	0	0	0	0	0	0	0	0	0	0	0	0	0.226244	0	0	0	0	0	0	0
CIC/07-153	27	0	0	0	0	0	0	0	0.263158	0.263158	0	0	0	0	0	0	0	0	0	0	0	0	0	18.6842	0	0.263158	0	0	0	0	0	0	0	0	0	0	0.263158	0	0	0	0	1.57895	0	0	0	0	0	0	0
CIC/07-158	28	0	0	0	0	0	0	0	0.456621	0		1.14155	0	0	0	0	0	0	0	0	0	0	0	32.4201	0	0	0	0	0	0	0	0	0	0	0	0	0.228311	0	0	0	0	0.228311	0	0	0	0	0	0	0
CIC/07-162	28.7	0	0	0	0	0.895522	0	0	0	0	0	0.597015	0	0	0	0	0	0	0	0	0	0	0.597015	38.5075	0	0	0	0	0	0	0	0	0	0	0	0	0	0	0	0	0	2.08955	0	0.597015	0	0	0	0	0
CIC/07-163	28.75	0	0	0	0	0	0	0	0	0	0	0	0	0	0	0	0	0	0	0	0	0	0	0	0	0	0	0	0	0	0	0	0	0	0	0	0	0	0	0	0	0	0	0	0	0	0	0	0
CIC/07-164	28.8	0	0	0	0	0	0	0	0	0	0	0	0	0	0	0	0	0	0	0	0	0	0	0	0	0	0	0	0	0	0	0	0	0	0	0	0	0	0	0	0	0	0	0	0	0	0	0	0
CIC/07-165	28.85	0	0	0	0	0	0	0	0	0	0	9.52381	0	0	0	0	0	0	0	0	0	0	0	28.5714	0	0	0	0	0	0	0	0	0	0	0	0	4.7619	0	0	0	0	0	0	0	0	0	0	0	0
CIC/07-166	28.9	0	0	0	0.323625	0.323625	0	0	0	0	0	0	0	0	0.323625	0	0	0	0	0	0	0	0.970874	22.0065	0	0	0	0	0	0	0.323625	0.323625	0	0		0	0.647249	0	0	0	1.2945	8.09061	0	0	0	0	0	0	0
CIC/07-167	28.95	0	0	0	0	0	0	0	0	0	0	0	0	0	0	0	0	0	0	0	0	0	0	26.6667	0	0	0	2.22222	0	0	0	0	0	0	0	0	0	0	0	0	0	4.44444	0	0	0	0	2.22222	0	0
CIC/07-168	29	0	0	0	0	0	0	0	0	0	0	0	0	0	0	0	0	0	0	0	0	0	0.280899	54.2135	0	0	0	0	0	0	0	0	0	0	0	0	0.561798	0	0	0	0	0.280899	0	0.280899	0	0	0	0	0
CIC/07-171	29.15	0.625	0	0	0.9375	0.3125	0	0	0	0	0	0.625	0	0	0	0	0	0	0	0	0	0	1.5625	44.6875	0	0	0	0	0	0	0	0	0	0	0	0	0	0	0	0	0	0.3125	0	0	0	0	0	0	0
CIC/07-172	29.2	0	0.290698	0	0	0.290698	0	0	0	0	0	0.581395	0	0	0	0	0	0	0	0	0	0	1.16279	43.314	0	0	0	0	0	0	0	0	0	0	0	0	0.581395	0	0	0	0.290698	1.45349	0	0.581395	0	0	0	0	0
CIC/07-173	29.25	0	0	0	0	0.309598	0	0	0	0	0	0.309598	0	0	0	0	0	0	0	0	0	0	2.47678	43.6533	0	0	0	0	0	0	0	0	0	0	0	0	0	0	0	0	0.309598	1.23839	0	0	0	0	0.309598	0	0
CIC/07-175	29.4	0.328947	0.328947	0	0.328947	0.328947	0	0	0	0	0	0	0	0	0	0	0	0	0	0	0	0	2.96053	41.1184	0	0.328947	0	0	1.97368	0	0	0	0	0	0	0	0	0	0	0	0	0.986842	0	0	0	0	0	0	0
CIC/07-181	30	0.299401	0	0	0	0	0	0	0	0	0	0.299401	0	0	0	0	0	0	0	0	0	0	0.898204	47.006	0	0	0	0	0.898204	0	0	0	0	0	0	0	0.598802	0	0	0	0	1.1976	0	0	0	0	0	0	0
CIC/07-191	31	0	0	0	0	0	0	0	0	0.280899	0	0	0	0	0	0	0	0	0	0	0	0	2.52809	42.1348	0	0	0	0.280899	0.842697	0	0	0.280899	0	0	0	0	0	0	0	0	0	2.80899	0	0	0	0	0.280899	0	0
CIC/07-198	31.7	0	0	0	0	0	0	0	0.217865	0.217865	0	0.217865	0	0	0	0	0	0	0	0	0	0	1.52505	35.512	0	0.217865	0	0	0	0		0	0	0	0	0	0	0	0	0	0.217865	1.08932	0	0	0	0	0	0	0
CIC/07-201	32.03	0	0	0	0	0	0	0	0	0	0	0	0	0	0	0	0	0	0	0	0	0	1.11732	45.2514	0	0	0	0	0.27933	0	0	0.27933	0	0	0	0	0.27933	0	0	0	0.837989	1.67598	0	0.27933	0	0	0	0	0
CIC/07-211	33	0	0	0	0	0	0.206612	0	0	0.206612	0	0.206612	0	0	0	0.206612	0	0	0	0	0	0	0.413223	24.3802	0	0	0	0	0	0	0	0.206612	0	0	0	0	0.206612	0	0	0	0	0.206612	0	0	0	0	0	0	0
CIC/07-222	34.03	0	0.262467	0	0	0	0	0	0	0	0	0.262467	0	0	0	0	0	0	0	0		0	0.262467	32.5459	0	0	0	0	0	0	0	0	0	0	0	0	0	0	0	0	0.524934	0.524934	0	0	0	0	0	0	0
CIC/07-228	35.02	0.22779	0.22779	0	0	0	0	0	0	0.22779	0	0.22779	0	0	0	0	0	0	0	0	0	0	0.22779	39.8633	0	0	0	0	0	0	0	0	0	0	0	0	0	0	0	0	0.22779	0.22779	0	0.22779	0	0	0.911162	0	0
CIC/07-238	36.13	0	0	0	0	0	0	0		0.21692	0	0.433839	0	0		0	0	0	0	0	0	0	0.867679	27.115	0	0	0	0	0	0	0	0	0	0	0	0	0	0	0	0	0	1.51844	0	0.433839	0	0	0.21692	0	0
CIC/07-247	37.09	0	0	0	0	0	0	0	0	0	0	0.238663	0	0		0	0	0	0	0	0.238663	0	0.238663	27.4463	0.238663	0	0.238663	0	0	0	0	0	0	0	0	0	0.238663	0	0	0	0	0.71599	0	0	0	0	0	0	0
CIC/07-257	38.02	0		0		0		0	0	0	0		0	0		0	0	0	0	0	0	0	0.4914	25.5528	0	0	0	0	0	0	0	0	0	0		0	0.2457	0	0	0	0.2457	0.982801	0	0	0	0	0	0	0
CIC/07-269	39.03	0	0.477327	0.238663	0	0.238663	0	0	0.238663	0.238663	0	0.238663	0	0	0.238663	0	0	0	0	0	0	0.238663	0.71599	20.7637	0	0	0	0	0	0	0	0	0	0	0	0	0.238663	0	0	0		0.238663	0	0.238663	0	0	1.19332	0	0
CIC/07-277	40	0	0	0	0	0	0	0	0	0	0	0	0	0	0.220751	0	0	0	0	0	0	0	0	15.4525	0	0	0.220751	0	0	0	0	0	0	0	0	0	0	0	0	0	0	0	0	0	0	0	0.441501	0	0
CIC/07-282	41	0	0	0	0		0.209644	0	0.209644	0	0	0	0	0		0	0	0	0	0	0		0.209644	10.9015	0	0	0	0	0	0	0.419287	0	0	0	0	0.419287	0.628931	0	0	0	0	0.838574	0	0.209644	0.209644	0	0.419287	0	0
CIC/07-288	42	0	0.228833	0.228833	0		0	0	0.457666	0.228833	0		0	0	0	0	0	0	0	0	0	0.228833	0.228833	17.1625	0	0	0	0	0	0	0	0	0	0.228833	0	0	0.228833	0	0	0	0	0.228833	0	0	0	0	0.228833	0	0
CIC/07-293	43	0.672646	0	0	0	0	0	0	0	0.224215		0	0	0	0	0	0	0	0	0.224215	0.224215	0	0.44843	16.1435	0		0	0	0	0	0	0	0	0.672646	0	0	0	0	0	0	0.44843	0.672646	0	0	0	0	0.896861	0	0
CIC/07-299	44	0	0.227273	0	0	0	0	0	0.227273	0	0	0	0	0	0.227273	0	0	0	0	0	0	0	0	22.9545	0	0	0	0	0	0	0.454545	0	0.227273	0	0	0	0	0	0	0	0	0.454545	0	0	0	0	2.27273	0	0
CIC/07-304	45	0.228833	0	0	0	0	0	0	0.915332	0	0	0.228833	0	0	0.228833	0	0	0	0	0	0	0.228833	0.457666	18.5355	0	0	0	0	0	0	0	0	0	0	0	0.228833	0.228833	0	0	0	0	0.228833	0	0	0	0	0.686499	0	0
CIC/07-309	46	0	0.488998	0	0	0	0	0	0	0	0.244499	0	0	0	0.244499	0	0	0	0	0	0	0.244499	0.733496	12.9584	0	0	0	0	0	0	0.244499	0	0	0	0	0	0.244499	0	0	0	0	0	0	0.244499	0	0	0.977995	0	0
CIC/07-314	47	0		0	0.207469	0	0	0	0.207469	0.207469	0	0.622407	0	0	0	0	0	0	0	0	0	0	0.414938	24.2739	0	0	0	0	0	0	0.414938	0	0.622407	0.207469		0.207469	0.414938	0	0	0	0	0.414938	0	0	0	0	0.414938	0	0
CIC/07-319	48	0	0	0	0	0.202429	0	0	0.404858	0.202429	0	0	0	0	0	0	0.202429	0	0	0	0	0	0.404858	30.1619	0	0	0	0	0	0	0.202429	0	0.809717	0	0.607287	0.809717	0.202429	0	0	0	0	0.202429	0	0	0.202429	0	1.01215	0	0.404858
CIC/07-324	49	0.308642	0.308642	0	0	0	0	0	0	0	0	0.925926	0	0	0	0	0	0	0	0	0	0	0	20.9877	0	0	0	0	0	0	0.308642	0	0	0	0	0	0.617284	0	0	0	0	0	0		0	0	1.23457	0	0
CIC/07-329	50	0	0	0	0	0.236967	0	0	0.236967	0	0	0.473934	0	0	0.236967	0.236967	0	0	0	0	0	0.236967	0.7109	22.2749	0	0	0	0	0	0	0	0	0.236967	0	0	0	0	0	0	0	0	0	0	0	0	0	0.7109	0	0
CIC/07-334	51	0	0	0	0	0.220751	0	0	0.220751	0.220751	0.441501	0.662252	0	0	0	0	0	0	0	0.220751	0	0	1.10375	19.8675	0	0	0	0	0	0	0.662252	0	0.220751	0	0	0.441501	0	0	0	0	0.220751	0	0	0	0	0	0.220751	0	0
CIC/07-339	52	0	0	0	0	0	0	0	0	0.27248	0.27248	1.3624	0	0	0.27248	0	0	0	0	0	0	0	1.90736	11.4441	0	0	0	0	0	0	0.27248	0	0.27248	0	0	0.544959	0	0	0	0	0	0	0	0	0	0	1.08992	0	0
CIC/07-344	53	0	0	0	0	0	0	0	0.20202	0.20202	0	1.21212	0	0	0	0	0	0	0	0	0	0.20202	0.40404	12.7273	0	0	0	0	0	0	0.606061	0	0.20202	0	0	0	0	0	0	0	0	0	0	0	0.20202	0.20202	0.606061	0	0
CIC/07-350	53.9	0.210084	0	0	0	0	0	0	0.840336	0.420168	0	0.630252	0	0	0.210084	0	0	0	0.420168	0	0	0.420168	0	13.0252	0	0	0	0	0	0.210084	0.420168	0	0.210084	0.420168	0.840336	0	0	0	0	0	0	0	0	0	0	0	0.420168	0	0
CIC/07-349	54	0	0	0.240964	0	0	0.240964	0	0.240964	0.240964	0	0.722892	0	0	0	0	0	0	0	0	0	0	1.92771	15.4217	0	0	0	0	0	0	0	0	0.722892	0		0	0.481928	0	0	0	0	0.240964	0	0.240964	0	0.240964	1.68675	0	0
CIC/07-351	54.1	0.182149	0	0	0	0.182149	0	0.182149	0.182149	0.546448	0		0	0	0	0.182149	0	0	0	0	0	0.182149	0.910747	14.5719	0	0	0	0	0	0	0.364299	0	0.182149	0	0.546448	0.546448	0	0	0	0	0	0.182149	0	0.364299	0	0.182149	0.546448	0	0
CIC/07-352	54.2	0	0	0	0	0	0.224215	0	0	0.224215	0	0.672646	0	0	0	0.224215	0	0	0	0	0	0	1.34529	21.0762	0	0	0	0	0	0	0.672646	0	0.672646	0.224215	0.224215	0.44843	0	0	0	0	0	0	0	0	0	0	0.672646	0	0
CIC/07-353	54.3	0	0	0	0	0.18797	0.56391	0	0.56391	0	0	1.50376	0	0	0	0	0	0	0	0	0	0.18797	1.50376	18.609	0	0	0	0	0		1.8797	0	0	0.18797	0.37594	0	0.18797	0	0	0	0.18797	0	0	0.37594	0	0	0.75188	0	0
CIC/07-354	54.4	0	0	0	0.294118	0.294118	0	0	0.294118	0	0	1.17647	0	0	0.294118	0	0	0	0.294118	0	0.588235	0	0.882353	19.1176	0	0	0.294118	0	0	0	0.882353	0	2.64706	0	0	0	0	0	0	0	0.294118	0	0	0.588235	0	0	0.294118	0	0
CIC/07-355	54.5	0	0	0	0.228311	0.456621	0	0	0	0.684932	0	0.684932	0	0	0	0.456621	0	0	0	0	0	0.228311	2.28311	13.4703	0	0	0	0	0	0	0.228311	0	0	0	0	0	0.228311		0	0	0	0	0	0.228311	0	0	0.684932	0	0
CIC/07-356	54.6	0	0	0	0	0	0	0	0.291545	0	0	1.45773	0	0	0	0	0	0	0	0.291545	0	0	2.04082	16.3265	0	0	0	0	0	0	1.16618	0	0.58309	0	0.58309	0.291545	0	0	0	0	0.291545	0	0	0.291545	0.291545	0	0	0	0
CIC/07-357	54.7	0	0	0	0	0	0.268097	0	0	0.268097	0	1.60858	0	0	0	0.268097	0.268097	0	0	0	0	0	1.87668	15.8177	0	0	0	0	0	0	0.80429	0	0	0	0.536193	0	0	0	0	0	0	0	0	0	0	0	0.536193	0	0
CIC/07-358	54.8	0	0	0	0.309598	0	0.309598	0	0.309598	0.619195	0	1.54799	0	0	0	0	0.309598	0	0	0	0	0	1.85759	13.9319	0	0	0.309598	0	0	0	0.619195	0	0.928793	0.309598	1.54799	0.309598	0		0	0	0	0	0	0	0	0	0	0	0
CIC/07-359	54.9	0	0.2457	0	0.2457	0.2457	0	0	0.4914	0.2457	0	0.4914	0	0	0	0	0	0	0	0	0	0	1.9656	9.09091	0	0	0	0	0	0	0.982801	0	0	0	0.737101	0.2457	0	0	0	0	0.2457	0	0	0	0	0	0.982801	0	0
CIC/07-361	55.1	0.239808	0	0	0	0.239808	0	0	0	0.719424	0	0	0.479616	0	0	0	0	0	0	0	0	0	0.959233	9.35252	0	0	0	0	0	0	0.239808	0	0.479616	0.479616	1.19904	0	0	0	0	0	0	0	0	0	0	0	0.719424	0	0
CIC/07-367	56.1	0	0	0	0	0.252525	0.252525	0	0.757576	0.505051	0	0	0	0	0	0	0	0	0	0	0	0.252525	1.0101	19.697	0	0	0	0	0		0.252525	0	0.252525	0	0.757576	0.252525	0	0	0	0	0	0	0	0.252525	0	0	0.252525	0	0
CIC/07-372	57.1	0	0	0	0	1.29534	0	0	0	0.259067	0	2.33161	0	0	0	0	0	0	0	0	0	0	1.03627	12.9534	0	0	0	0	0	0	1.03627	0	0.777202	0	0.777202	0.259067	0.259067	0	0	0	0	0.259067	0	0.259067	0.259067	0	0.518135	0	0
CIC/07-377	58.1	0.242718	0	0	0	0	0	0	0	0.242718	0	0.242718	0	0	0	0	0	0	0	0	0	0	1.69903	13.835	0	0	0	0	0	0	0.242718	0	0.242718	0	0	0.242718	0.242718	0	0	0	0	0.728155	0	0.242718	0	0	0.242718	0	0
CIC/07-382	59.1	0.461894	0	0	0	0	0	0	0.461894	1.38568	0	0.461894	0	0	0	0	0	0	0.230947	0	0	0.230947	1.15473	13.164	0	0	0	0	0	0	0.230947	0	0.230947	0.230947	0.461894	0	0	0	0	0	0	0	0.461894	0	0	0	0.461894	0	0
CIC/07-387	60.1	0	0	0	0	1.26263	0	0	0	0.757576	0	0	0	0		0	0	0	0	0	0.252525	0	1.76768	12.3737	0	0	0	0	0	0	0.505051	0	0.252525	0	2.0202	0.505051	0	0	0	0	0	0.252525	0	0	0	0	0.505051	0	0
CIC/07-389	60.5	0	0	0	0	0		0	0	0.615385	0	1.23077	0	0	0	0	0		1.23077		0	0	0.615385	16	0	0	0	0	0	0	0	0	0	0	0.307692	0	0		0	0		0	0	0	0	0	0.307692	0	0
CIC/07-392	61.1	0	0	0	0	0.234742	0	0	0	0	0	0.234742	0	0		0.234742	0	0	0	0	0	0	0	9.62441	0	0	0	0	0	0	0.704225	0	0.234742	0	0.234742	0	0		0	0	0	0	0	0	0	0	0.938967	0	0
CIC/07-393	61.3	0	0	0	0	0	0	0	0.37594	0.37594	0	1.12782	0	0	0	0	0	0	0.75188	0.75188	0.75188	0	1.12782	15.7895	0	0	0	0	0	0	1.50376	0	1.50376	0	2.63158	0	0	0	0	0	0	0	0	0	0	0	0	0	0
CIC/07-395	61.7	0	0	0	0	0.299401	0	0	0.299401	0.598802	0	2.09581	0	0.299401	0.598802	0	0	0	0.598802	0	0	0	1.1976	11.3772	0.299401	0	0	0	0	0	0.898204	0	0.898204	0	2.39521	0	0	0	0	0	0	0	0	0	0	0	0.299401	0	0
CIC/07-397	62.1	0.277008	0.277008	0	0	0	0	0	0.277008	0.277008	0	0.554017	0	0	0	0.277008	0	0	0	0	0	0	0.831025	10.5263	0	0	0	0	0	0	0.831025	0	0.277008	0	0.554017	0	0	0	0	0	0		0	0	0	0	0	0	0
CIC/07-402	63.1	0	0.230947	0	0	0	0.230947	0	0	1.15473	0	0.461894	0	0	0.230947	0.230947	0	0	0	0	0	0	1.15473	11.3164	0	0	0	0	0	0	0.692841	0	0	0	0	0	0	0	0	0	0	0	0	0.692841	0	0	0.461894	0	0
CIC/07-407	64	0	0.630252	0	0	0	0.420168	0	0.210084	0.210084	0	0.630252	0	0	0	0	0	0	0.210084	0	0	0.210084	1.2605	5.46218	0	0	0	0	0	0	0.630252	0	0	0.210084	0.630252	0	0	0	0	0	0	0	0	0	0	0	0.630252	0.210084	0
CIC/07-412	65	0	0	0	0	0	0	0	0.542005	1.08401		0.813008	0	0	0	0	0	0	0	0		0.271003	1.62602	13.8211	0	0	0	0	0	0	0.542005	0	0	0	0.542005	0.542005	0	0	0	0	0	0	0	0	0	0	1.08401	0	0
CIC/07-417	66	0	0.223714	0	0	0.223714	0	0	0	0.671141	0	0.447427	0	0	0	0.223714	0	0	0	0	0	0	1.566	10.2908	0	0	0	0	0	0	0.447427	0	0.671141	0.447427	1.34228	0	0	0	0	0	0	0	0	0	0	0	0.894855	0	0
CIC/07-422	67	0	0.508906	0	0	0.508906	0	0	0	0.254453	0	0.508906	0	0	0	0	0	0	0	0	0	0	0.254453	9.16031	0	0	0	0	0	0	1.78117	0	0.254453	0	1.27226	0	0	0	0	0	0.254453	0	0	0	0	0	0	0	0
CIC/07-427	68	0.547945	0.273973	0	0	0.547945	0	0	0	0.821918	0	1.09589	0	0	0	0	0	0.547945	0	0	0		1.36986	9.31507	0	0	0	0	0	0	0.547945	0	0	0	1.36986	0	0	0	0	0	0	0	0	0	0.273973	0	0.547945	0	0
CIC/07-432	69	0	0.956938	0	0	0	0	0	0	0.956938	0	0.717703	0	0	0	0	0	0	0.239234	0	0.239234	0.956938	1.19617	5.26316	0	0	0	0	0	0	0	0	0	0	0.956938	0	0	0	0	0	0	0	0	0	0	0	0	0	0
CIC/07-437	70	0	0.742574	0	0	0.49505	0.247525	0	0	0.49505	0	1.48515	0	0	0	0	0	0	0	0	0	0	0	10.6436	0	0	0	0	0	0	0.990099	0	0.247525	0	1.73267	0	0	0	0	0	0	0	0	0	0.247525	0	0.247525	0	0
CIC/07-442	71	0	0.246305	0	0	0.246305	0.246305	0	0	0.246305	0	0.985222	0	0	0	0	0	0	0.246305	0	0	0.492611	0.492611	11.8227	0	0	0	0	0	0	0	0	0	0	2.70936	0	0	0	0	0	0	0	0	0	0	0	0	0	0
CIC/07-447	72	0	0.4914	0	0	0	0	0	0.4914	0	0.4914	0	0	0.2457	0	0	0	0.4914	0.2457	0.2457	0	0.4914	1.4742	14.9877	0	0	0	0	0	0	2.2113	0	0.2457	0	1.7199	0	0	0	0	0	0	0	0	0	0.2457	0	0	0	0
CIC/07-449	72.4	0	0	0	0	0	0	0	0	0.303951	0	0.607903	0	0		0	0	0.303951	0	0	0.303951	0	0.911854	12.462	0	0	0	0	0	0	0.607903	0	0	0	3.95137	0	0	0	0	0	0	0	0	0	0	0	0	0	0
CIC/07-450	72.6	0.34965	0	0	0	0	0	0	0.34965	0	0	0.699301	0	0	0.34965	0	0	0	0	0	0	0	0.699301	22.3776	0	0	0	0	0	0	0.699301	0	0	0	4.8951	0	0	0	0	0	0	0	0	0	0	0	0	0	0
CIC/07-451	72.8	0	0.260417	0	0	0	0.78125	0.260417	0	0.260417	0	0.78125	0	0	0	0	0	0.260417	0	0	0	0	0.260417	14.5833	0	0	0	0	0	0	0.260417	0	0.260417	0	2.34375	0	0	0	0	0	0	0	0	0	0	0	0	0	0
CIC/07-451 bis	72.79	0.2331	0	0	0	0.2331	0.932401	0	1.1655	0.2331	0	3.0303	0	0	0	0.4662	0	0	0.2331	0	0	0.2331	0.4662	18.8811	0	0	0	0	0	0	0.2331	0	0.2331	0	3.0303	0	0	0.699301	0	0	0	0	0	0	0	0	0	0	0
CIC/07-452	73.8	0	0	0	0	0.35461	0.35461	0	0	0	0	0	0	0	0	0.35461	0	0.35461	0.35461	0	0	0	1.06383	6.02837	0	0	0	0	0	0	1.06383	0	0	0	2.48227	0	0		0	0	0	0	0	0	0	0	0	0	0
CIC/07-457	74	0	0.289017	0	0	0.578035	0	0	0	0.289017	0	0.867052	0	0	0	0	0	0	0	0	0	0	0.289017	5.49133	0	0	0	0	0	0	0	0	0	0	1.15607	0	0	0	0	0	0	0	0	0	0	0	0	0	0
CIC/07-462	75	0	0	0	0	0.488998	0	0	0	0.244499	0	0	0	0	0	0	0	0	0	0	0	0.244499	0.488998	2.20049	0	0	0	0	0	0	0	0.244499	0	0	0.488998	0	0	0	0	0	0	0	0	0	0	0	0	0	0
CIC/07-467	76	0		0	0		0	0	0	0.230947	0	0.230947	0	0	0	0	0	0.230947	0	0	0	0.230947	0.461894	4.38799	0	0	0	0	0	0	0.230947	0	0	0	0.692841	0	0	0	0	0	0	0	0	0	0	0	0	0	0
CIC/07-472	77	0	0.230947	0	0	0.461894	0	0	0	0.923788	0	0.461894	0	0	0.230947	0	0	0	0.230947	0	0	0	0	6.46651	0	0	0	0	0	0	1.38568	0	0.461894	0	1.84758	0	0	0	0	0	0	0	0	0	0	0.230947	0	0	0
CIC/07-477	78	0	0	0	0	1.82292	0	0	0	0.520833	0	0.260417	0	0	0.260417	0	0	0	0	0	0	0	1.82292	8.33333	0	0	0	0	0	0	0.520833	0	0.260417	0	1.5625	0	0	0	0	0	0	0	0	0	0	0	0	0	0
CIC/07-482	79	0	0.552486	0	0	0	0	0	0	0	0	0	0	0	0.552486	0.276243	0	0	0	0	0	0	1.38122	13.2597	0	0	0	0	0	0	0.552486	0	0	0	3.03867	0	0	0.552486	0	0	0	0	0	0	0	0	0	0	0
CIC/07-487	80	0	0.496278	0	0	0.248139	0	0	0	0	0	0.496278	0	0	0	0	0	0	0	0		0	0.992556	8.933	0	0	0	0	0	0	0.496278	0	0	0	2.23325	0	0	0	0	0	0	0	0	0	0	0	0	0	0
CIC/07-492	81	0	0	0	0		0	0	0.683371	0.22779		0.683371	0	0.22779	0	0	0	0	0	0	0	0	2.2779	20.7289	0	0	0	0	0	0.22779	0.22779	0	0	0	1.13895	0	0	0.683371	0	0	0	0	0	0	0	0	0	0	0
[truncated: 76 more columns]

## Sheet: % GENERA without thoracosphaera
sample	Height (m)	Biantholithusspp.	Biantholithussp.1	Biscutum cf.	Biscutum spp.	Braarudosphaera spp.	Calcidiscus kingii	Calcidiscus cf. kingii (ellittico)	Campylosphaera eodela/dela	Cepekiella lumina	Chiasmolithus californicus (13-21μm)	Chiasmolithus consuetus (5-12μm)	Chiasmolithusconsuetus/C. danicus	Chiasmolithus grandis	Chiasmolithus bidens/C.solitus	Chiasmolithus titus	Chiasmolithusspp.	CHIASMOLITHUS	Chiphragmalithus spp. (circolare)	Chiphragmalithus spp. (ellitico)	Clausicoccus spp.	Coccolithus eopelagicus (16-20μm)	Coccolithus jugatum	Coccolithus miopelagicus (13-16μm)	Coccolithus pelagicus (6-13μm)	COCCOLITHUS	Cruciplacolithus latipons	Cruciplacolithus tenuis	Cruciplacolithus sp.1	Discoaster anartios	Discoaster araneus	Discoaster barbadiensis	Discoaster binodosus	Discoaster delicatus	Discoaster diastypus	Discoaster diastypussalisburgensis	Discoaster kuepperi	Discoaster kuepperi/D. salisburgensis	Discoaster lenticularis	Discoaster lodoensis	Discoaster mahmoudii	Discoaster medious	Discoaster mohleri	Discoaster multiradiatus	Discoaster mohleri/D. nobilis gr.	Discoaster nobilis gr.	Discoaster nonaradiatus.	Discoaster robustus	Discoaster salisburgensis
CIC/07-1	0.09	0.268817	0	0	0	0	0	0	0	0	0	0	0	0	0	0	0.268817	0.268817	0	0	0	0	0	0	26.8817	26.8817	0	0	0	0	0	0	0	0	0	0	0	0	0	0	0	0	0.537634	0	0	0	0	0	0
CIC/07-6	1.07	0.372439	0	0.18622	0	0.18622	0	0	0	0	0	0.744879	0	0	0.18622	0	0	0.931099	0	0	0	0	0	0.18622	26.4432	26.6294	0	0	0	0	0	0	0	0.18622	0	0	0	0	0	0	0	0	0.558659	0	0	0	0	0	0
CIC/07-11	2.095	0	0	0	0	0.174216	0	0	0	0	0	0.522648	0	0	0	0	0	0.522648	0	0	0	0	0	0.174216	32.7526	32.9268	0	0.174216	0	0	0	0	0	0	0	0	0	0	0	0	0	0	0.174216	0	0	0	0	0	0
CIC/07-16	3.265	0	0	0.164745	0	0	0	0	0	0	0	0.329489	0	0	0.164745	0	0	0.494234	0	0	0	0	0	0	25.8649	25.8649	0	0.164745	0	0	0	0	0	0	0	0	0	0	0	0	0	0	0.494234	0	0	0.164745	0	0	0
CIC/07-18	3.51	0	0	0	0	0	0	0	0	0	0.271739	0.271739	0	0	0.271739	0	0	0.815217	0	0	0	0	0	0.543478	26.6304	27.1739	0		0	0	0	0	0	0	0	0	0	0	0	0	0	0	0.271739	0	0	0	0	0	0
CIC/07-20	3.655	0	0	0	0	0	0	0	0	0	0	0.49505	0	0	0	0	0	0.49505	0	0	0	0	0	0	31.4356	31.4356	0	0.247525	0	0	0	0	0	0	0	0	0	0	0	0	0	0	0	0	0	0.247525	0	0	0
CIC/07-24	4.045	0	0	0	0	0	0	0	0	0.264901	0.13245	0	0	0	0	0	0	0.13245	0	0	0	0	0.13245	0	36.1589	36.1589	0	0	0	0	0	0	0	0	0	0	0	0	0	0	0	0	0.264901	0	0	0	0	0	0
CIC/07-27	5.11	0.208333	0	0	0	0	0	0	0	0	0.208333	0.416667	0	0	0.208333	0	0	0.833333	0	0	0	0	0	0	28.125	28.125	0	0	0	0	0	0	0	0	0	0	0	0	0	0	0	0	0	0	0.208333	0	0	0	0
CIC/07-32	6.14	0.253807	0	0	0	0	0	0	0	0.507614	0.253807	0.253807	0	0	0	0	0	0.507614	0	0	0	0	0	0	24.6193	24.6193	0	0	0	0	0	0	0	0	0	0	0	0	0	0	0	0	0	0	0	0	0	0	0
CIC/07-36	6.98	0.410678	0.616016	0	0	0	0	0	0	0	0	0.205339	0	0	0	0	0	0.205339	0	0	0	0	0	0.205339	26.078	26.2834	0	0	0	0	0	0	0	0	0	0	0	0	0	0	0	0	0	0	0	0	0	0	0
CIC/07-41	8.07	0.287356	0	0.287356	0	0	0	0	0	0	0	1.43678	0	0	0	0	0	1.43678	0	0	0	0	0	1.14943	43.1034	44.2529	0	0	0	0	0	0	0	0	0	0	0	0	0	0	0	0	0	0	0	0	0	0	0
CIC/07-42	8.13	0	0.243902	0	0	0.243902	0	0	0	0	0	0	0	0	0	0	0	0	0	0	0	0	0	0	23.9024	23.9024	0	0	0	0	0	0	0	0	0	0	0	0	0	0	0	0	0	0	0	0	0	0	0
CIC/07-43	8.33	0	0	0	0	0	0	0	0	0	0	0	0	0	0	0	0	0	0	0	0	0	0	1.20482	42.6506	43.8554	0	0	0	0	0	0	0	0.240964	0	0	0	0	0	0	0	0	0	0	0	0	0	0	0
CIC/07-44	8.51	0.310559	0.310559	0	0	0	0	0	0	0	0	0.310559	0	0	0	0	0	0.310559	0	0	0	0	0	0	21.7391	21.7391	0	0	0	0	0	0	0	0	0	0	0	0	0	0	0	0	0	0	0	0	0	0	0
CIC/07-45	8.75	0.265957	0	0	0	0	0	0	0	0		0.531915	0	0	0	0	0	0.531915	0	0	0		0	0	39.8936	39.8936	0	0	0	0	0	0	0	0.265957	0	0	0	0	0	0	0	0	0	0	0	0	0	0	0
CIC/07-47	9.11	0.153846	0	0	0	0	0	0	0	0.461538	0	0.153846	0	0	0	0	0	0.153846	0	0	0	0	0.153846	1.69231	31.3846	33.0769	0	0.153846	0	0	0	0	0	0	0	0	0	0	0	0	0	0	0.461538	0	0	0	0	0	0
CIC/07-52	10.01	0	0	0	0	0	0	0	0	0	0	0	0	0	0	0	0	0	0	0	0	0	0.207039	0.828157	28.3644	29.1925	0	0	0	0	0	0	0	0.828157	0	0	0	0	0	0	0	0	0		0	0.207039	0	0	0
CIC/07-58	11	0.15949	0.15949	0	0	0	0	0	0	0.318979	0.15949	0	0.15949	0	0.15949	0	0	0.478469	0	0	0	0	0	0.15949	24.5614	24.7209	0	0	0	0	0	0	0	0	0	0	0	0	0	0	0	0	0.15949	0.15949	0	0	0	0	0
CIC/07-65	12.15	0.178891	0	0.178891	0	0	0	0	0	0.178891	0	0	0	0	0.178891	0	0	0.178891	0	0	0	0	0	0.357782	31.6637	32.0215	0	0.178891	0.178891	0	0	0	0	0.178891	0	0	0	0	0	0	0	0	0.178891	0.357782	0	0	0	0	0
CIC/07-71	13	0.520833	0	0	0	0	0	0	0.260417	0.260417		0.260417	0	0	0	0	0	0.260417	0	0	0	0	0	0.520833	40.8854	41.4063	0	0	0	0	0	0	0	0.520833	0	0	0	0	0.260417	0	0	0	0	1.30208	0	0	0	0	0
CIC/07-77	14.1	0	0	0	0	0	0	0	0	0	0	0.275482	0	0	0	0	0	0.275482	0	0	0	0	0	0	36.9146	36.9146	0	0	0	0	0	0	0	0.550964	0	0	0	0	0.275482	0	0	0	0.550964	0.550964	0	0	0	0	0
CIC/07-79	14.52	0	0	0	0	0	0	0	0.265252	0	0	0	0	0	0	0	0	0	0	0	0	0	0	0.265252	28.1167	28.382	0	0	0	0	0	0	0	0	0	0	0	0	0	0	0	0	0	0.795756	0	0	0	0	0
CIC/07-82	14.92	0	0	0.498753	0	0	0	0	0	0	0.249377	0	0	0	0.249377	0	0	0.498753	0	0	0	0	0	0.498753	29.1771	29.6758	0	0	0	0	0	0	0	0	0	0	0	0	0.249377	0	0	0	0.249377	2.99252	0	0.249377	0	0	0
CIC/07-88	15.98	0.273224	0	0	0	0	0	0	0	0.273224	0	0.546448	0	0	0	0	0	0.546448	0	0	0	0	0	0.273224	31.1475	31.4208	0	0	0	0	0	0	0	0	0	0	0	0	0	0	0	0	0	1.36612	0	0	0	0	0
CIC/07-94	16.95	0.25	0.25	0	0	0	0	0	0	0	0.25	0.25	0	0	0.25	0	0	0.75	0	0	0	0	0		28.25	28.25	0	0.25	0	0	0	0	0	0.25	0	0	0	0	0.25	0	0	0	0.5	1	0	0	0	0	0
CIC/07-99	18	0.243309	0	0	0	0	0	0	0	0.243309	0	0	0	0	0	0	0	0	0	0	0	0	0.486618		28.2238	28.2238	0	0	0	0	0	0	0	0.243309	0	0	0	0	0	0	0	0	0	1.45985	0	0	0	0	0
CIC/07-105	18.52	0	0	0.260417	0	0	0	0	0	0		0.260417	0	0	0.260417	0	0	0.520833	0	0	0	0	0	0.520833	25.5208	26.0417	0	0	0	0	0	0	0	0	0	0	0	0	0	0	0	0	0	0.260417	0	0	0	0	0
CIC/07-108	19	0	0	0	0	0	0	0	0	0.204918			0	0		0	0	0	0	0	0	0	0	0.204918	31.5574	31.7623	0	0	0	0	0	0	0	0.204918	0	0	0	0	0.204918	0	0	0	0	0.409836	0	0	0	0	0
CIC/07-113	20	0.20202	0	0	0	0	0	0	0.20202	0	0	0	0	0	0	0	0	0	0	0	0	0	0	0.40404	29.0909	29.4949	0	0	0	0	0	0	0	0	0	0	0	0	0.606061	0	0	0	0	0.40404	0	0	0	0	0
CIC/07-122	20.99	0	0	0	0	0	0	0	0.310559	0.310559	0	0	0	0	0	0	0	0	0	0	0	0	0	0	18.6335	18.6335	0	0	0	0	0	0	0	0	0	0	0	0	0	0	0	0	0	2.79503	0	0	0	0	0
CIC/07-127	22	0	0	0	0	0	0	0	0	0	0	0	0	0	0	0	0	0	0	0	0	0	0	0	24.8276	24.8276	0	0	0	0	0	0	0	0.229885	0	0	0	0	0	0	0	0	0	0.91954	0	0	0	0	0
CIC/07-133	23		0	0	0	0.238663	0	0	0	0.238663	0	0	0	0		0	0	0	0	0	0	0	0		26.4916	26.4916	0	0	0	0	0	0	0	0.238663	0	0	0	0	0.238663	0	0	0	0	0.238663	0	0	0	0	0
CIC/07-138	24	0.665188	0	0	0	0	0	0	0	0	0	0	0	0	0	0	0	0	0	0	0	0	0	0.221729	28.8248	29.0466	0	0	0	0	0	0	0	0	0	0	0	0	0	0	0	0	0.221729	0.221729	0	0.221729	0	0	0
CIC/07-143	25	0.205339	0	0	0	0	0	0	0	0		0	0	0	0	0	0	0	0	0	0	0	0	0	28.7474	28.7474	0	0	0	0	0	0	0	0	0	0	0	0	0	0	0	0	0	0.616016	0	0	0	0	0
CIC/07-148	26	0.226244	0	0	0	0	0	0	0	0.226244	0		0	0	0.226244	0	0	0.226244	0	0	0	0	0	0.678733	30.9955	31.6742	0	0	0	0	0	0	0	0	0	0	0	0	0	0	0	0	0	0.226244	0	0	0	0	0
CIC/07-153	27	0	0	0	0	0	0	0	0.263158	0.263158	0	0	0	0	0	0	0	0	0	0	0	0	0	0	18.6842	18.6842	0	0.263158	0	0	0	0	0	0	0	0	0	0	0.263158	0	0	0	0	1.57895	0	0	0	0	0
CIC/07-158	28	0	0	0	0	0	0	0	0.456621	0		1.14155	0	0	0	0	0	1.14155	0	0	0	0	0	0	32.4201	32.4201	0	0	0	0	0	0	0	0	0	0	0	0	0.228311	0	0	0	0	0.228311	0	0	0	0	0
CIC/07-162	28.7	0	0	0	0	0.895522	0	0	0	0	0	0.597015	0	0	0	0	0	0.597015	0	0	0	0	0	0.597015	38.5075	39.1045	0	0	0	0	0	0	0	0	0	0	0	0	0	0	0	0	0	2.08955	0	0.597015	0	0	0
CIC/07-163	28.75	0	0	0	0	0	0	0	0	0	0	0	0	0	0	0	0	0	0	0	0	0	0	0	0	0	0	0	0	0	0	0	0	0	0	0	0	0	0	0	0	0	0	0	0	0	0	0	0
CIC/07-164	28.8	0	0	0	0	0	0	0	0	0	0	0	0	0	0	0	0	0	0	0	0	0	0	0	0	0	0	0	0	0	0	0	0	0	0	0	0	0	0	0	0	0	0	0	0	0	0	0	0
CIC/07-165	28.85	0	0	0	0	0	0	0	0	0	0	9.52381	0	0	0	0	0	9.52381	0	0	0	0	0	0	28.5714	28.5714	0	0	0	0	0	0	0	0	0	0	0	0	4.7619	0	0	0	0	0	0	0	0	0	0
CIC/07-166	28.9	0	0	0	0.323625	0.323625	0	0	0	0	0	0	0	0	0.323625	0	0	0.323625	0	0	0	0	0	0.970874	22.0065	22.9773	0	0	0	0	0	0	0.323625	0.323625	0	0		0	0.647249	0	0	0	1.2945	8.09061	0	0	0	0	0
CIC/07-167	28.95	0	0	0	0	0	0	0	0	0	0	0	0	0	0	0	0	0	0	0	0	0	0	0	26.6667	26.6667	0	0	0	2.22222	0	0	0	0	0	0	0	0	0	0	0	0	0	4.44444	0	0	0	0	2.22222
CIC/07-168	29	0	0	0	0	0	0	0	0	0	0	0	0	0	0	0	0	0	0	0	0	0	0	0.280899	54.2135	54.4944	0	0	0	0	0	0	0	0	0	0	0	0	0.561798	0	0	0	0	0.280899	0	0.280899	0	0	0
CIC/07-171	29.15	0.625	0	0	0.9375	0.3125	0	0	0	0	0	0.625	0	0	0	0	0	0.625	0	0	0	0	0	1.5625	44.6875	46.25	0	0	0	0	0	0	0	0	0	0	0	0	0	0	0	0	0	0.3125	0	0	0	0	0
CIC/07-172	29.2	0	0.290698	0	0	0.290698	0	0	0	0	0	0.581395	0	0	0	0	0	0.581395	0	0	0	0	0	1.16279	43.314	44.4767	0	0	0	0	0	0	0	0	0	0	0	0	0.581395	0	0	0	0.290698	1.45349	0	0.581395	0	0	0
CIC/07-173	29.25	0	0	0	0	0.309598	0	0	0	0	0	0.309598	0	0	0	0	0	0.309598	0	0	0	0	0	2.47678	43.6533	46.13	0	0	0	0	0	0	0	0	0	0	0	0	0	0	0	0	0.309598	1.23839	0	0	0	0	0.309598
CIC/07-175	29.4	0.328947	0.328947	0	0.328947	0.328947	0	0	0	0	0	0	0	0	0	0	0	0	0	0	0	0	0	2.96053	41.1184	44.0789	0	0.328947	0	0	1.97368	0	0	0	0	0	0	0	0	0	0	0	0	0.986842	0	0	0	0	0
CIC/07-181	30	0.299401	0	0	0	0	0	0	0	0	0	0.299401	0	0	0	0	0	0.299401	0	0	0	0	0	0.898204	47.006	47.9042	0	0	0	0	0.898204	0	0	0	0	0	0	0	0.598802	0	0	0	0	1.1976	0	0	0	0	0
CIC/07-191	31	0	0	0	0	0	0	0	0	0.280899	0	0	0	0	0	0	0	0	0	0	0	0	0	2.52809	42.1348	44.6629	0	0	0	0.280899	0.842697	0	0	0.280899	0	0	0	0	0	0	0	0	0	2.80899	0	0	0	0	0.280899
CIC/07-198	31.7	0	0	0	0	0	0	0	0.217865	0.217865	0	0.217865	0	0	0	0	0	0.217865	0	0	0	0	0	1.52505	35.512	37.037	0	0.217865	0	0	0	0		0	0	0	0	0	0	0	0	0	0.217865	1.08932	0	0	0	0	0
CIC/07-201	32.03	0	0	0	0	0	0	0	0	0	0	0	0	0	0	0	0	0	0	0	0	0	0	1.11732	45.2514	46.3687	0	0	0	0	0.27933	0	0	0.27933	0	0	0	0	0.27933	0	0	0	0.837989	1.67598	0	0.27933	0	0	0
CIC/07-211	33	0	0	0	0	0	0.206612	0	0	0.206612	0	0.206612	0	0	0	0.206612	0	0.413223	0	0	0	0	0	0.413223	24.3802	24.7934	0	0	0	0	0	0	0	0.206612	0	0	0	0	0.206612	0	0	0	0	0.206612	0	0	0	0	0
CIC/07-222	34.03	0	0.262467	0	0	0	0	0	0	0	0	0.262467	0	0	0	0	0	0.262467	0	0	0		0	0.262467	32.5459	32.8084	0	0	0	0	0	0	0	0	0	0	0	0	0	0	0	0	0.524934	0.524934	0	0	0	0	0
CIC/07-228	35.02	0.22779	0.22779	0	0	0	0	0	0	0.22779	0	0.22779	0	0	0	0	0	0.22779	0	0	0	0	0	0.22779	39.8633	40.0911	0	0	0	0	0	0	0	0	0	0	0	0	0	0	0	0	0.22779	0.22779	0	0.22779	0	0	0.911162
CIC/07-238	36.13	0	0	0	0	0	0	0		0.21692	0	0.433839	0	0		0	0	0.433839	0	0	0	0	0	0.867679	27.115	27.9826	0	0	0	0	0	0	0	0	0	0	0	0	0	0	0	0	0	1.51844	0	0.433839	0	0	0.21692
CIC/07-247	37.09	0	0	0	0	0	0	0	0	0	0	0.238663	0	0		0	0	0.238663	0	0	0	0.238663	0	0.238663	27.4463	27.9236	0.238663	0	0.238663	0	0	0	0	0	0	0	0	0	0.238663	0	0	0	0	0.71599	0	0	0	0	0
CIC/07-257	38.02	0		0		0		0	0	0	0		0	0		0	0	0	0	0	0	0	0	0.4914	25.5528	26.0442	0	0	0	0	0	0	0	0	0	0		0	0.2457	0	0	0	0.2457	0.982801	0	0	0	0	0
CIC/07-269	39.03	0	0.477327	0.238663	0	0.238663	0	0	0.238663	0.238663	0	0.238663	0	0	0.238663	0	0	0.477327	0	0	0	0	0.238663	0.71599	20.7637	21.4797	0	0	0	0	0	0	0	0	0	0	0	0	0.238663	0	0	0		0.238663	0	0.238663	0	0	1.19332
CIC/07-277	40	0	0	0	0	0	0	0	0	0	0	0	0	0	0.220751	0	0	0.220751	0	0	0	0	0	0	15.4525	15.4525	0	0	0.220751	0	0	0	0	0	0	0	0	0	0	0	0	0	0	0	0	0	0	0	0.441501
CIC/07-282	41	0	0	0	0		0.209644	0	0.209644	0	0	0	0	0		0	0	0	0	0	0	0		0.209644	10.9015	11.1111	0	0	0	0	0	0	0.419287	0	0	0	0	0.419287	0.628931	0	0	0	0	0.838574	0	0.209644	0.209644	0	0.419287
CIC/07-288	42	0	0.228833	0.228833	0		0	0	0.457666	0.228833	0		0	0	0	0	0	0	0	0	0	0	0.228833	0.228833	17.1625	17.3913	0	0	0	0	0	0	0	0	0	0.228833	0	0	0.228833	0	0	0	0	0.228833	0	0	0	0	0.228833
CIC/07-293	43	0.672646	0	0	0	0	0	0	0	0.224215		0	0	0	0	0	0	0	0	0	0.224215	0.224215	0	0.44843	16.1435	16.8161	0		0	0	0	0	0	0	0	0.672646	0	0	0	0	0	0	0.44843	0.672646	0	0	0	0	0.896861
CIC/07-299	44	0	0.227273	0	0	0	0	0	0.227273	0	0	0	0	0	0.227273	0	0	0.227273	0	0	0	0	0	0	22.9545	22.9545	0	0	0	0	0	0	0.454545	0	0.227273	0	0	0	0	0	0	0	0	0.454545	0	0	0	0	2.27273
CIC/07-304	45	0.228833	0	0	0	0	0	0	0.915332	0	0	0.228833	0	0	0.228833	0	0	0.457666	0	0	0	0	0.228833	0.457666	18.5355	18.9931	0	0	0	0	0	0	0	0	0	0	0	0.228833	0.228833	0	0	0	0	0.228833	0	0	0	0	0.686499
CIC/07-309	46	0	0.488998	0	0	0	0	0	0	0	0.244499	0	0	0	0.244499	0	0	0.488998	0	0	0	0	0.244499	0.733496	12.9584	13.6919	0	0	0	0	0	0	0.244499	0	0	0	0	0	0.244499	0	0	0	0	0	0	0.244499	0	0	0.977995
CIC/07-314	47	0		0	0.207469	0	0	0	0.207469	0.207469	0	0.622407	0	0	0	0	0	0.622407	0	0	0	0	0	0.414938	24.2739	24.6888	0	0	0	0	0	0	0.414938	0	0.622407	0.207469		0.207469	0.414938	0	0	0	0	0.414938	0	0	0	0	0.414938
CIC/07-319	48	0	0	0	0	0.202429	0	0	0.404858	0.202429	0	0	0	0	0	0	0.202429	0.202429	0	0	0	0	0	0.404858	30.1619	30.5668	0	0	0	0	0	0	0.202429	0	0.809717	0	0.607287	0.809717	0.202429	0	0	0	0	0.202429	0	0	0.202429	0	1.01215
CIC/07-324	49	0.308642	0.308642	0	0	0	0	0	0	0	0	0.925926	0	0	0	0	0	0.925926	0	0	0	0	0	0	20.9877	20.9877	0	0	0	0	0	0	0.308642	0	0	0	0	0	0.617284	0	0	0	0	0	0		0	0	1.23457
CIC/07-329	50	0	0	0	0	0.236967	0	0	0.236967	0	0	0.473934	0	0	0.236967	0.236967	0	0.947867	0	0	0	0	0.236967	0.7109	22.2749	22.9858	0	0	0	0	0	0	0	0	0.236967	0	0	0	0	0	0	0	0	0	0	0	0	0	0.7109
CIC/07-334	51	0	0	0	0	0.220751	0	0	0.220751	0.220751	0.441501	0.662252	0	0	0	0	0	1.10375	0	0	0.220751	0	0	1.10375	19.8675	20.9713	0	0	0	0	0	0	0.662252	0	0.220751	0	0	0.441501	0	0	0	0	0.220751	0	0	0	0	0	0.220751
CIC/07-339	52	0	0	0	0	0	0	0	0	0.27248	0.27248	1.3624	0	0	0.27248	0	0	1.90736	0	0	0	0	0	1.90736	11.4441	13.3515	0	0	0	0	0	0	0.27248	0	0.27248	0	0	0.544959	0	0	0	0	0	0	0	0	0	0	1.08992
CIC/07-344	53	0	0	0	0	0	0	0	0.20202	0.20202	0	1.21212	0	0	0	0	0	1.21212	0	0	0	0	0.20202	0.40404	12.7273	13.1313	0	0	0	0	0	0	0.606061	0	0.20202	0	0	0	0	0	0	0	0	0	0	0	0.20202	0.20202	0.606061
CIC/07-350	53.9	0.210084	0	0	0	0	0	0	0.840336	0.420168	0	0.630252	0	0	0.210084	0	0	0.840336	0	0.420168	0	0	0.420168	0	13.0252	13.0252	0	0	0	0	0	0.210084	0.420168	0	0.210084	0.420168	0.840336	0	0	0	0	0	0	0	0	0	0	0	0.420168
CIC/07-349	54	0	0	0.240964	0	0	0.240964	0	0.240964	0.240964	0	0.722892	0	0	0	0	0	0.722892	0	0	0	0	0	1.92771	15.4217	17.3494	0	0	0	0	0	0	0	0	0.722892	0		0	0.481928	0	0	0	0	0.240964	0	0.240964	0	0.240964	1.68675
CIC/07-351	54.1	0.182149	0	0	0	0.182149	0	0.182149	0.182149	0.546448	0		0	0	0	0.182149	0	0.182149	0	0	0	0	0.182149	0.910747	14.5719	15.4827	0	0	0	0	0	0	0.364299	0	0.182149	0	0.546448	0.546448	0	0	0	0	0	0.182149	0	0.364299	0	0.182149	0.546448
CIC/07-352	54.2	0	0	0	0	0	0.224215	0	0	0.224215	0	0.672646	0	0	0	0.224215	0	0.896861	0	0	0	0	0	1.34529	21.0762	22.4215	0	0	0	0	0	0	0.672646	0	0.672646	0.224215	0.224215	0.44843	0	0	0	0	0	0	0	0	0	0	0.672646
CIC/07-353	54.3	0	0	0	0	0.18797	0.56391	0	0.56391	0	0	1.50376	0	0	0	0	0	1.50376	0	0	0	0	0.18797	1.50376	18.609	20.1128	0	0	0	0	0		1.8797	0	0	0.18797	0.37594	0	0.18797	0	0	0	0.18797	0	0	0.37594	0	0	0.75188
CIC/07-354	54.4	0	0	0	0.294118	0.294118	0	0	0.294118	0	0	1.17647	0	0	0.294118	0	0	1.47059	0	0.294118	0	0.588235	0	0.882353	19.1176	20.5882	0	0	0.294118	0	0	0	0.882353	0	2.64706	0	0	0	0	0	0	0	0.294118	0	0	0.588235	0	0	0.294118
CIC/07-355	54.5	0	0	0	0.228311	0.456621	0	0	0	0.684932	0	0.684932	0	0	0	0.456621	0	1.14155	0	0	0	0	0.228311	2.28311	13.4703	15.7534	0	0	0	0	0	0	0.228311	0	0	0	0	0	0.228311		0	0	0	0	0	0.228311	0	0	0.684932
CIC/07-356	54.6	0	0	0	0	0	0	0	0.291545	0	0	1.45773	0	0	0	0	0	1.45773	0	0	0.291545	0	0	2.04082	16.3265	18.3673	0	0	0	0	0	0	1.16618	0	0.58309	0	0.58309	0.291545	0	0	0	0	0.291545	0	0	0.291545	0.291545	0	0
CIC/07-357	54.7	0	0	0	0	0	0.268097	0	0	0.268097	0	1.60858	0	0	0	0.268097	0.268097	2.14477	0	0	0	0	0	1.87668	15.8177	17.6944	0	0	0	0	0	0	0.80429	0	0	0	0.536193	0	0	0	0	0	0	0	0	0	0	0	0.536193
CIC/07-358	54.8	0	0	0	0.309598	0	0.309598	0	0.309598	0.619195	0	1.54799	0	0	0	0	0.309598	1.85759	0	0	0	0	0	1.85759	13.9319	15.7895	0	0	0.309598	0	0	0	0.619195	0	0.928793	0.309598	1.54799	0.309598	0		0	0	0	0	0	0	0	0	0
CIC/07-359	54.9	0	0.2457	0	0.2457	0.2457	0	0	0.4914	0.2457	0	0.4914	0	0	0	0	0	0.4914	0	0	0	0	0	1.9656	9.09091	11.0565	0	0	0	0	0	0	0.982801	0	0	0	0.737101	0.2457	0	0	0	0	0.2457	0	0	0	0	0	0.982801
CIC/07-361	55.1	0.239808	0	0	0	0.239808	0	0	0	0.719424	0	0	0.479616	0	0	0	0	0.479616	0	0	0	0	0	0.959233	9.35252	10.3118	0	0	0	0	0	0	0.239808	0	0.479616	0.479616	1.19904	0	0	0	0	0	0	0	0	0	0	0	0.719424
CIC/07-367	56.1	0	0	0	0	0.252525	0.252525	0	0.757576	0.505051	0	0	0	0	0	0	0	0	0	0	0	0	0.252525	1.0101	19.697	20.7071	0	0	0	0	0		0.252525	0	0.252525	0	0.757576	0.252525	0	0	0	0	0	0	0	0.252525	0	0	0.252525
CIC/07-372	57.1	0	0	0	0	1.29534	0	0	0	0.259067	0	2.33161	0	0	0	0	0	2.33161	0	0	0	0	0	1.03627	12.9534	13.9896	0	0	0	0	0	0	1.03627	0	0.777202	0	0.777202	0.259067	0.259067	0	0	0	0	0.259067	0	0.259067	0.259067	0	0.518135
CIC/07-377	58.1	0.242718	0	0	0	0	0	0	0	0.242718	0	0.242718	0	0	0	0	0	0.242718	0	0	0	0	0	1.69903	13.835	15.534	0	0	0	0	0	0	0.242718	0	0.242718	0	0	0.242718	0.242718	0	0	0	0	0.728155	0	0.242718	0	0	0.242718
CIC/07-382	59.1	0.461894	0	0	0	0	0	0	0.461894	1.38568	0	0.461894	0	0	0	0	0	0.461894	0	0.230947	0	0	0.230947	1.15473	13.164	14.3187	0	0	0	0	0	0	0.230947	0	0.230947	0.230947	0.461894	0	0	0	0	0	0	0	0.461894	0	0	0	0.461894
CIC/07-387	60.1	0	0	0	0	1.26263	0	0	0	0.757576	0	0	0	0		0	0	0	0	0	0	0.252525	0	1.76768	12.3737	14.3939	0	0	0	0	0	0	0.505051	0	0.252525	0	2.0202	0.505051	0	0	0	0	0	0.252525	0	0	0	0	0.505051
CIC/07-389	60.5	0	0	0	0	0		0	0	0.615385	0	1.23077	0	0	0	0	0	1.23077		1.23077		0	0	0.615385	16	16.6154	0	0	0	0	0	0	0	0	0	0	0.307692	0	0		0	0		0	0	0	0	0	0.307692
CIC/07-392	61.1	0	0	0	0	0.234742	0	0	0	0	0	0.234742	0	0		0.234742	0	0.469484	0	0	0	0	0	0	9.62441	9.62441	0	0	0	0	0	0	0.704225	0	0.234742	0	0.234742	0	0		0	0	0	0	0	0	0	0	0.938967
CIC/07-393	61.3	0	0	0	0	0	0	0	0.37594	0.37594	0	1.12782	0	0	0	0	0	1.12782	0	0.75188	0.75188	0.75188	0	1.12782	15.7895	17.6692	0	0	0	0	0	0	1.50376	0	1.50376	0	2.63158	0	0	0	0	0	0	0	0	0	0	0	0
CIC/07-395	61.7	0	0	0	0	0.299401	0	0	0.299401	0.598802	0	2.09581	0	0.299401	0.598802	0	0	2.99401	0	0.598802	0	0	0	1.1976	11.3772	12.5749	0.299401	0	0	0	0	0	0.898204	0	0.898204	0	2.39521	0	0	0	0	0	0	0	0	0	0	0	0.299401
CIC/07-397	62.1	0.277008	0.277008	0	0	0	0	0	0.277008	0.277008	0	0.554017	0	0	0	0.277008	0	0.831025	0	0	0	0	0	0.831025	10.5263	11.3573	0	0	0	0	0	0	0.831025	0	0.277008	0	0.554017	0	0	0	0	0	0		0	0	0	0	0
CIC/07-402	63.1	0	0.230947	0	0	0	0.230947	0	0	1.15473	0	0.461894	0	0	0.230947	0.230947	0	0.923788	0	0	0	0	0	1.15473	11.3164	12.4711	0	0	0	0	0	0	0.692841	0	0	0	0	0	0	0	0	0	0	0	0	0.692841	0	0	0.461894
CIC/07-407	64	0	0.630252	0	0	0	0.420168	0	0.210084	0.210084	0	0.630252	0	0	0	0	0	0.630252	0	0.210084	0	0	0.210084	1.2605	5.46218	6.72269	0	0	0	0	0	0	0.630252	0	0	0.210084	0.630252	0	0	0	0	0	0	0	0	0	0	0	0.630252
CIC/07-412	65	0	0	0	0	0	0	0	0.542005	1.08401		0.813008	0	0	0	0	0	0.813008	0	0	0		0.271003	1.62602	13.8211	15.4472	0	0	0	0	0	0	0.542005	0	0	0	0.542005	0.542005	0	0	0	0	0	0	0	0	0	0	1.08401
CIC/07-417	66	0	0.223714	0	0	0.223714	0	0	0	0.671141	0	0.447427	0	0	0	0.223714	0	0.671141	0	0	0	0	0	1.566	10.2908	11.8568	0	0	0	0	0	0	0.447427	0	0.671141	0.447427	1.34228	0	0	0	0	0	0	0	0	0	0	0	0.894855
CIC/07-422	67	0	0.508906	0	0	0.508906	0	0	0	0.254453	0	0.508906	0	0	0	0	0	0.508906	0	0	0	0	0	0.254453	9.16031	9.41476	0	0	0	0	0	0	1.78117	0	0.254453	0	1.27226	0	0	0	0	0	0.254453	0	0	0	0	0	0
CIC/07-427	68	0.547945	0.273973	0	0	0.547945	0	0	0	0.821918	0	1.09589	0	0	0	0	0	1.09589	0.547945	0	0	0		1.36986	9.31507	10.6849	0	0	0	0	0	0	0.547945	0	0	0	1.36986	0	0	0	0	0	0	0	0	0	0.273973	0	0.547945
CIC/07-432	69	0	0.956938	0	0	0	0	0	0	0.956938	0	0.717703	0	0	0	0	0	0.717703	0	0.239234	0	0.239234	0.956938	1.19617	5.26316	6.69856	0	0	0	0	0	0	0	0	0	0	0.956938	0	0	0	0	0	0	0	0	0	0	0	0
CIC/07-437	70	0	0.742574	0	0	0.49505	0.247525	0	0	0.49505	0	1.48515	0	0	0	0	0	1.48515	0	0	0	0	0	0	10.6436	10.6436	0	0	0	0	0	0	0.990099	0	0.247525	0	1.73267	0	0	0	0	0	0	0	0	0	0.247525	0	0.247525
CIC/07-442	71	0	0.246305	0	0	0.246305	0.246305	0	0	0.246305	0	0.985222	0	0	0	0	0	0.985222	0	0.246305	0	0	0.492611	0.492611	11.8227	12.3153	0	0	0	0	0	0	0	0	0	0	2.70936	0	0	0	0	0	0	0	0	0	0	0	0
CIC/07-447	72	0	0.4914	0	0	0	0	0	0.4914	0	0.4914	0	0	0.2457	0	0	0	0.737101	0.4914	0.2457	0.2457	0	0.4914	1.4742	14.9877	16.4619	0	0	0	0	0	0	2.2113	0	0.2457	0	1.7199	0	0	0	0	0	0	0	0	0	0.2457	0	0
CIC/07-449	72.4	0	0	0	0	0	0	0	0	0.303951	0	0.607903	0	0		0	0	0.607903	0.303951	0	0	0.303951	0	0.911854	12.462	13.6778	0	0	0	0	0	0	0.607903	0	0	0	3.95137	0	0	0	0	0	0	0	0	0	0	0	0
CIC/07-450	72.6	0.34965	0	0	0	0	0	0	0.34965	0	0	0.699301	0	0	0.34965	0	0	1.04895	0	0	0	0	0	0.699301	22.3776	23.0769	0	0	0	0	0	0	0.699301	0	0	0	4.8951	0	0	0	0	0	0	0	0	0	0	0	0
CIC/07-451	72.8	0	0.260417	0	0	0	0.78125	0.260417	0	0.260417	0	0.78125	0	0	0	0	0	0.78125	0.260417	0	0	0	0	0.260417	14.5833	14.8438	0	0	0	0	0	0	0.260417	0	0.260417	0	2.34375	0	0	0	0	0	0	0	0	0	0	0	0
CIC/07-451 bis	72.79	0.2331	0	0	0	0.2331	0.932401	0	1.1655	0.2331	0	3.0303	0	0	0	0.4662	0	3.4965	0	0.2331	0	0	0.2331	0.4662	18.8811	19.3473	0	0	0	0	0	0	0.2331	0	0.2331	0	3.0303	0	0	0.699301	0	0	0	0	0	0	0	0	0
CIC/07-452	73.8	0	0	0	0	0.35461	0.35461	0	0	0	0	0	0	0	0	0.35461	0	0.35461	0.35461	0.35461	0	0	0	1.06383	6.02837	7.0922	0	0	0	0	0	0	1.06383	0	0	0	2.48227	0	0		0	0	0	0	0	0	0	0	0
CIC/07-457	74	0	0.289017	0	0	0.578035	0	0	0	0.289017	0	0.867052	0	0	0	0	0	0.867052	0	0	0	0	0	0.289017	5.49133	5.78035	0	0	0	0	0	0	0	0	0	0	1.15607	0	0	0	0	0	0	0	0	0	0	0	0
CIC/07-462	75	0	0	0	0	0.488998	0	0	0	0.244499	0	0	0	0	0	0	0	0	0	0	0	0	0.244499	0.488998	2.20049	2.68949	0	0	0	0	0	0	0	0.244499	0	0	0.488998	0	0	0	0	0	0	0	0	0	0	0	0
CIC/07-467	76	0		0	0		0	0	0	0.230947	0	0.230947	0	0	0	0	0	0.230947	0.230947	0	0	0	0.230947	0.461894	4.38799	4.84988	0	0	0	0	0	0	0.230947	0	0	0	0.692841	0	0	0	0	0	0	0	0	0	0	0	0
CIC/07-472	77	0	0.230947	0	0	0.461894	0	0	0	0.923788	0	0.461894	0	0	0.230947	0	0	0.692841	0	0.230947	0	0	0	0	6.46651	6.46651	0	0	0	0	0	0	1.38568	0	0.461894	0	1.84758	0	0	0	0	0	0	0	0	0	0	0.230947	0
CIC/07-477	78	0	0	0	0	1.82292	0	0	0	0.520833	0	0.260417	0	0	0.260417	0	0	0.520833	0	0	0	0	0	1.82292	8.33333	10.1562	0	0	0	0	0	0	0.520833	0	0.260417	0	1.5625	0	0	0	0	0	0	0	0	0	0	0	0
CIC/07-482	79	0	0.552486	0	0	0	0	0	0	0	0	0	0	0	0.552486	0.276243	0	0.828729	0	0	0	0	0	1.38122	13.2597	14.6409	0	0	0	0	0	0	0.552486	0	0	0	3.03867	0	0	0.552486	0	0	0	0	0	0	0	0	0
CIC/07-487	80	0	0.496278	0	0	0.248139	0	0	0	0	0	0.496278	0	0	0	0	0	0.496278	0	0	0		0	0.992556	8.933	9.92556	0	0	0	0	0	0	0.496278	0	0	0	2.23325	0	0	0	0	0	0	0	0	0	0	0	0
CIC/07-492	81	0	0	0	0		0	0	0.683371	0.22779		0.683371	0	0.22779	0	0	0	0.911162	0	0	0	0	0	2.2779	20.7289	23.0068	0	0	0	0	0	0.22779	0.22779	0	0	0	1.13895	0	0	0.683371	0	0	0	0	0	0	0	0	0
[truncated: 99 more columns]

## Sheet: Discoaster%
SAMPLE	Height (m)	Discoaster anartios	Discoaster araneus	Discoaster backmanii	Discoaster cf. barbadiensis	Discoaster binodosusgr.	Discoaster deflandrei	Discoaster delicatus	Discoaster delicatus/D. multiradiatus	Discoaster diastypus	Discoaster cf. diastypus	Discoaster cf. geometricus	Discoaster kuepperi	Discoaster kuepperi/D. salisburgensis	Discoaster lenticularis	Discoaster lodoensis	Discoaster mahmoudii	Discoaster medious	Discoaster mohleri	Discoaster mohleri(piccoli)	Discoaster cf. multiradiatus	Discoaster multiradiatus	Discoaster nobilisgr.	Discoaster nobilisgr. malformato	Discaoster paelikei	Discaoster robustus	Discoaster salisburgensis	Discoaster salisburgensis/D. diastypus	Discoaster splendidus	Discoaster cf. tanii	Discoaster uncinatus	Discoaster wemmelensis	Discoaster sp.x (5 raggi)	Discoaster spp.	TOTAL	Percentages within discoasters	SAMPLE	Discoaster anartios	Discoaster araneus	Discoaster backmanii	Discoaster cf. barbadiensis	Discoaster binodosuscf.	Discoaster deflandrei	Discoaster delicatus	Discoaster delicatus/D. multiradiatus	Discoaster diastypus	Discoaster cf. diastypus	Discoaster cf. geometricus	Discoaster kuepperi
CIC/07-1	0.09	0	0	0	0	0	0	0	0	0	0	0	0	0	0	0	0	0	14	0	0	0	0	0	0	0	0	0	2	0	0	0	0	2	18		CIC/07-1	0	0	0	0	0	0	0	0	0	0	0	0
CIC/07-6	1.07	0	0	2	0	0	0	1	0	0	0	0	0	0	0	0	0	0	9	0	0	0	0	0	0	0	0	0	0	0	0	0	0	2	14		CIC/07-6	0	0	14.2857	0	0	0	7.14286	0	0	0	0	0
CIC/07-11	2.095	0	0	0	0	0	0	0	0	0	0	0	0	0	0	0	0	0	6	0	0	0	0	0	0	0	0	0	1	0	0	0	0	0	7		CIC/07-11	0	0	0	0	0	0	0	0	0	0	0	0
CIC/07-16	3.265	0	0	0	0	0	0	0	0	0	0	0	0	0	0	0	0	0	8	0	0	0	2	0	0	0	0	0	0	0	0	0	0	1	11		CIC/07-16	0	0	0	0	0	0	0	0	0	0	0	0
CIC/07-18	3.51	0	0	0	0	0	0	0	0	0	0	0	0	0	0	0	0	0	4	0	0	0	1	0	0	0	0	0	0	0	0	0	0	0	5		CIC/07-18	0	0	0	0	0	0	0	0	0	0	0	0
CIC/07-24	4.045	0	0	0	0	0	0	0	0	0	0	0	0	0	0	0	0	0	7	0	0	0	1	0	0	0	0	0	0	0	0	0	0	0	8		CIC/07-24	0	0	0	0	0	0	0	0	0	0	0	0
CIC/07-27	5.11	0	0	0	0	0	0	cf	0	0	0	0	0	0	0	0	0	0	5	0	0	0	2	0	0	0	0	0	0	0	0	0	0	0	7		CIC/07-27	0	0	0	0	0	0		0	0	0	0	0
CIC/07-42	8.13	0	0	0	0	0	0	5	0	0	0	0	0	0	0	0	0	0	2	0	1	0	1	0	0	0	0	0	0	0	0	0	0	0	9		CIC/07-42	0	0	0	0	0	0	55.5556	0	0	0	0	0
CIC/07-47	9.11	0	0	0	0	0	0	0	0	0	0	0	0	0	0	0	0	0	8	0	2	0	0	0	0	0	0	0	0	0	0	0	0	0	10		CIC/07-47	0	0	0	0	0	0	0	0	0	0	0	0
CIC/07-52	10.01	0	0	0	0	0	0	13	1	0	0	0	0	0	1	0	0	0	9	0	0	1	0	0	0	0	0	0	0	0	0	0	0	0	25		CIC/07-52	0	0	0	0	0	0	52	4	0	0	0	0
CIC/07-58	11	0	0	0	0	0	0	10	0	0	0	0	0	0	3	0	0	0	11	2	3	17	1	0	0	0	0	0	0	0	0	0	0	3	50		CIC/07-58	0	0	0	0	0	0	20	0	0	0	0	0
CIC/07-65	12.15	0	0	0	0	0	0	11	0	0	0	0	0	0	6	0	0	0	6	1	0	41	0	0	0	0	0	0	0	0	0	0	0	1	66		CIC/07-65	0	0	0	0	0	0	16.6667	0	0	0	0	0
CIC/07-71	13	0	0	0	0	0	0	7	0	0	0	0	0	0	4	0	0	2	8	1	0	27	5	0	0	0	1	0	0	0	0	0	0	2	57		CIC/07-71	0	0	0	0	0	0	12.2807	0	0	0	0	0
CIC/07-77	14.1	0	0	0	0	0	0	5	0	0	0	0	0	0	7	0	0	cf	7	0	0	33	3	0	0	0	0	0	0	0	0	0	0	0	55		CIC/07-77	0	0	0	0	0	0	9.09091	0	0	0	0	0
CIC/07-79	14.52	0	0	0	0	0	0	5	0	0	0	0	0	0	2	0	0	0	2	0	1	40	0	0	0	0	0	0	1	0	0	0	0	0	51		CIC/07-79	0	0	0	0	0	0	9.80392	0	0	0	0	0
CIC/07-82	14.92	0	0	0	0	cf	0	8	0	0	0	0	0	0	5	0	0	0	7	1	0	42	2	0	0	0	0	0	0	0	0	0	0	0	65		CIC/07-82	0	0	0	0		0	12.3077	0	0	0	0	0
CIC/07-88	15.98	0	0	0	0	0	0	3	0	0	0	0	0	0	3	0	0	1	5	0	2	50	2	0	0	0	0	0	0	0	0	0	0	0	66		CIC/07-88	0	0	0	0	0	0	4.54545	0	0	0	0	0
CIC/07-94	16.95	0	0	0	0	0	0	0	0	0	0	0	0	0	13	0	0	0	5	0	0	49	0	0	0	0	0	0	0	0	0	0	0	0	67		CIC/07-94	0	0	0	0	0	0	0	0	0	0	0	0
CIC/07-105	18.52	0	0	0	0	0	0	4	0	0	0	0	0	0	6	0	0	1	15	0	1	25	6	0	0	0	0	0	0	0	0	0	0	0	58		CIC/07-105	0	0	0	0	0	0	6.89655	0	0	0	0	0
CIC/07-99	18	0	0	0	0	0	0	5	0	0	0	0	0	0	6	0	0	0	3	1	1	32	2	0	0	0	0	0	0	0	0	0	0	1	51		CIC/07-99	0	0	0	0	0	0	9.80392	0	0	0	0	0
CIC/07-108	19	0	0	0	0	0	0	5	0	0	0	0	0	0	7	0	0	1	4	9	0	53	5	0	0	0	0	0	0	0	0	0	0	0	84		CIC/07-108	0	0	0	0	0	0	5.95238	0	0	0	0	0
CIC/07-113	20	0	0	0	0	0	0	0	0	0	0	0	0	0	5	0	0	0	4	2	0	43	0	0	0	0	cf	0	0	0	0	0	0	1	55		CIC/07-113	0	0	0	0	0	0	0	0	0	0	0	0
CIC/07-122	20.99	0	0	0	0	0	0	3	0	0	0	0	0	0	4	0	0	0	3	0	1	36	1	0	0	0	0	0	0	0	0	0	0	0	48		CIC/07-122	0	0	0	0	0	0	6.25	0	0	0	0	0
CIC/07-127	22	0	0	0	0	cf	0	6	0	0	0	0	0	0	9	0	0	0	4	1	1	77	0	0	0	0	0	0	0	0	0	0	0	0	98		CIC/07-127	0	0	0	0		0	6.12245	0	0	0	0	0
CIC/07-133	23	0	0	0	0	0	0	5	0	0	0	0	0	0	5	0	0	0	1	1	2	34	5	0	0	0	0	0	0	0	0	0	0	1	54		CIC/07-133	0	0	0	0	0	0	9.25926	0	0	0	0	0
CIC/07-138	24	0	0	0	0	0	0	5	0	0	0	0	0	0	3	0	0	1	1	3	0	30	8	0	0	0	1	0	0	0	0	0	0	2	54		CIC/07-138	0	0	0	0	0	0	9.25926	0	0	0	0	0
CIC/07-143	25	0	0	0	0	cf	0	8	0	0	0	0	0	0	7	0	0	0	1	2	0	34	11	0	0	cf	0	0	0	0	0	0	0	2	65		CIC/07-143	0	0	0	0		0	12.3077	0	0	0	0	0
CIC/07-148	26	0	0	0	0	0	0	3	0	0	0	0	0	0	6	0	0	0	2	1	0	35	5	0	0	0	0	0	0	0	0	0	0	0	52		CIC/07-148	0	0	0	0	0	0	5.76923	0	0	0	0	0
CIC/07-153	27	0	0	0	0	0	0	2	0	0	0	0	0	0	3	0	0	0	1	0	0	42	5	0	0	0	1	0	1	0	0	0	0	0	55		CIC/07-153	0	0	0	0	0	0	3.63636	0	0	0	0	0
CIC/07-158	28	0	0	0	0	0	0	6	0	0	0	0	0	0	11	0	0	0	2	0	0	66	5	0	0	0	0	0	0	0	0	0	0	0	90		CIC/07-158	0	0	0	0	0	0	6.66667	0	0	0	0	0
CIC/07-162	28.7	0	0	0	0	0	0	1	0	0	0	0	0	0	5	0	0	0	1	1	0	24	10	0	0	0	0	0	0	0	0	0	0	1	43		CIC/07-162	0	0	0	0	0	0	2.32558	0	0	0	0	0
CIC/07-163	28.75	0	0	0	0	0	0	0	0	0	0	0	0	0	0	0	0	0	0	0	0	0	0	0	0	0	0	0	0	0	0	0	0	0	0		CIC/07-163	#DIV/0!	#DIV/0!	#DIV/0!	#DIV/0!	#DIV/0!	#DIV/0!	#DIV/0!	#DIV/0!	#DIV/0!	#DIV/0!	#DIV/0!	#DIV/0!
CIC/07-164	28.8	0	0	0	0	0	0	0	0	0	0	0	0	0	0	0	0	0	0	0	0	0	0	0	0	0	0	0	0	0	0	0	0	0	0		CIC/07-164	#DIV/0!	#DIV/0!	#DIV/0!	#DIV/0!	#DIV/0!	#DIV/0!	#DIV/0!	#DIV/0!	#DIV/0!	#DIV/0!	#DIV/0!	#DIV/0!
CIC/07-165	28.85	0	0	0	0	0	0	0	0	0	0	0	0	0	0	0	0	0	0	0	0	0	0	0	0	0	0	0	0	0	0	0	0	0	0		CIC/07-165	#DIV/0!	#DIV/0!	#DIV/0!	#DIV/0!	#DIV/0!	#DIV/0!	#DIV/0!	#DIV/0!	#DIV/0!	#DIV/0!	#DIV/0!	#DIV/0!
CIC/07-166	28.9	0	0	0	0	2	0	1	0	0	0	0	1	0	3	0	0	0	4	0	0	41	0	0	0	0	1	0	0	0	0	0	0	0	53		CIC/07-166	0	0	0	0	3.77358	0	1.88679	0	0	0	0	1.88679
CIC/07-168	29	0	1	0	0	0	0	1	0	0	0	0	0	0	3	cf	0	0	1	0	0	12	4	0	0	0	9	0	0	0	0	0	0	3	34		CIC/07-168	0	2.94118	0	0	0	0	2.94118	0	0	0	0	0
CIC/07-171	29.15	6	2	0	0	0	0	2	0	0	0	0	0	0	1	0	0	0	6	0	0	34	6	0	0	0	5	0	0	0	0	0	0	0	62		CIC/07-171	9.67742	3.22581	0	0	0	0	3.22581	0	0	0	0	0
CIC/07-172	29.2	2	5	0	0	0	0	4	0	0	0	0	0	1	3	0	0	0	1	0	0	26	3	0	0	0	2	0	0	0	0	0	0	3	50		CIC/07-172	4	10	0	0	0	0	8	0	0	0	0	0
CIC/07-173	29.25	0	9	0	0	0	0	2	0	0	0	0	1cf	0	3	cf	1	1	5	0	0	40	8	0	0	0	12	0	2	0	0	0	0	4	87		CIC/07-173	0	10.3448	0	0	0	0	2.29885	0	0	0	0
CIC/07-174	29.3	1	20	0	0	0	0	2	0	0	0	0	2cf	0	1	0	1	0	6	0	0	27	1	0	0	0	2	0	0	0	0	0	0	3	64		CIC/07-174	1.5625	31.25	0	0	0	0	3.125	0	0	0	0
CIC/07-175	29.4	0	15	0	0	3cf	0	3	0	0	0	0	0	0	1	0	0	0	4	0	0	28	4	3	0	0	0	0	0	0	1	0	0	2	61		CIC/07-175	0	24.5902	0	0		0	4.91803	0	0	0	0	0
CIC/07-177	29.6	0	17	0	0	0	0	7	0	0	0	0	1	0	4	0	2	0	2	0	0	34	4	0	2	0	1	0	0	0	0	0	0	1	75		CIC/07-177	0	22.6667	0	0	0	0	9.33333	0	0	0	0	1.33333
CIC/07-179	29.8	2	13	0	0	0	0	4	0	0	0	0	0	0	5	0	1	0	0	0	0	32	3	0	2	0	1	0	0	0	0	0	0	0	63		CIC/07-179	3.1746	20.6349	0	0	0	0	6.34921	0	0	0	0	0
CIC/07-181	30	0	14	0	0	0	0	0	0	0	0	0	cf	0	5	0	1	0	3	2	0	16	1	0	0	0	1	0	0	0	0	0	0	2	45		CIC/07-181	0	31.1111	0	0	0	0	0	0	0	0	0
CIC/07-191	31	1	8	0	0	0	0	3	0	0	0	0	0	0	9	0	0	0	1	0	0	83	7	0	1	0	0	0	0	0	0	0	0	0	113		CIC/07-191	0.884956	7.07965	0	0	0	0	2.65487	0	0	0	0	0
CIC/07-198	31.7	0	1	0	0	2	0	3	0	0	0	0	0	0	0	cf	0	1	5	0	1	38	2	1	0	0	2	0	0	0	0	0	0	1	57		CIC/07-198	0	1.75439	0	0	3.50877	0	5.26316	0	0	0	0	0
CIC/07-201	32.03	0	3	0	0	0	0	0	0	0	0	0	0	0	4	0	1	0	4	2	0	58	20	5	0	0	1	0	0	0	0	0	0	1	99		CIC/07-201	0	3.0303	0	0	0	0	0	0	0	0	0	0
CIC/07-222	34.03	0	cf	0	0	0	0	2	0	0	0	0	0	0	6	0	0	0	6	0	0	31	5	0	0	0	0	0	0	0	0	0	0	1	51		CIC/07-222	0		0	0	0	0	3.92157	0	0	0	0	0
CIC/07-228	35.02	0	0	0	0	0	0	0	0	0	0	0	0	0	5	0	0	0	2	1	0	29	5	0	0	0	11	0	0	0	0	0	0	1	54		CIC/07-228	0	0	0	0	0	0	0	0	0	0	0	0
CIC/07-238	36.13	0	0	0	0	0	0	2	0	0	0	0	0	0	3	0	0	0	3	0	0	37	5	0	1	0	3	0	0	0	0	0	0	1	55		CIC/07-238	0	0	0	0	0	0	3.63636	0	0	0	0	0
CIC/07-247	37.09	0	0	0	0	0	0	0	0	0	0	0	0	0	7	0	0	0	6	2	0	43	10	0	0	0	3	0	0	1	0	0	0	2	74		CIC/07-247	0	0	0	0	0	0	0	0	0	0	0	0
CIC/07-257	38.02	0	0	0	1	3	0	3	0	0	0	0	2cf	0	10	0	0	0	4	0	0	51	12	0	0	0	22	0	0	0	0	0	0	1	107		CIC/07-257	0	0	0	0.934579	2.80374	0	2.80374	0	0	0	0
CIC/07-269	39.03	0	0	0	0	7	0	2	0	0	0	0	2cf	0	0	0	0	0	1	0	1	52	12	0	0	0	13	0	0	0	0	0	0	1	89		CIC/07-269	0	0	0	0	7.86517	0	2.24719	0	0	0	0
CIC/07-277	40	0	0	0	0	8	0	0	0	0	0	0	4	3	2	0	0	2	2	0	0	10	3	0	0	0	14	0	0	0	0	0	0	1	49		CIC/07-277	0	0	0	0	16.3265	0	0	0	0	0	0	8.16327
CIC/07-282	41	0	0	0	0	10	0	0	0	1	0	0	1	3	7	0	0	0	1	2	0	11	4	0	0	cf	9	0	0	0	0	0	0	1	50		CIC/07-282	0	0	0	0	20	0	0	0	2	0	0	2
CIC/07-288	42	0	0	0	0	13	0	cf	0	0	0	0	2	2	11	0	0	0	1	1	0	8	1	0	0	2	15	2	0	0	0	0	0	0	58		CIC/07-288	0	0	0	0	22.4138	0		0	0	0	0	3.44828
CIC/07-293	43	0	0	0	0	7	0	0	0	0	0	0	cf	1	2	0	0	0	2	0	0	0	5	0	0	0	22	11	0	0	0	0	0	2	52		CIC/07-293	0	0	0	0	13.4615	0	0	0	0	0	0
CIC/07-299	44	0	0	0	0	32	1	0	0	2	2	0	1	1	7	0	0	0	cf	0	0	11	4	0	0	1	35	0	0	0	0	0	0	3	100		CIC/07-299	0	0	0	0	32	1	0	0	2	2	0	1
CIC/07-304	45	0	0	0	0	12	1cf	0	0	5	0	0	4	2	7	0	0	0	1	0	0	5	5	0	0	1	23	0	0	1	0	0	0	3	69		CIC/07-304	0	0	0	0	17.3913		0	0	7.24638	0	0	5.7971
CIC/07-309	46	0	0	0	0	16	0	0	0	6	0	0	1	11	3	1	0	0	0	1	1	3	2	0	0	0	32	0	0	0	0	0	0	0	77		CIC/07-309	0	0	0	0	20.7792	0	0	0	7.79221	0	0	1.2987
CIC/07-314	47	0	0	0	0	12	0	0	0	8	0	0	3	8	10	0	0	0	3	0	1	4	1	0	0	2	34	2	0	0	0	0	0	3	91		CIC/07-314	0	0	0	0	13.1868	0	0	0	8.79121	0	0	3.2967
CIC/07-319	48	0	0	0	0	11	0	0	0	21	0	0	7	4	5	0	0	0	1	1	0	3	0	0	0	1	19	0	0	0	0	0	0	4	77		CIC/07-319	0	0	0	0	14.2857	0	0	0	27.2727	0	0	9.09091
CIC/07-324	49	0	0	0	0	8	0	0	0	4	0	0	1	2	7	0	0	0	0	1	0	7	2	0	0	0	22	0	0	0	0	0	0	4	58		CIC/07-324	0	0	0	0	13.7931	0	0	0	6.89655	0	0	1.72414
CIC/07-329	50	0	0	0	1	25	0	0	0	13	0	0	5	0	1	0	0	0	0	0	0	4	0	0	0	2	28	1	0	0	0	0	0	2	82		CIC/07-329	0	0	0	1.21951	30.4878	0	0	0	15.8537	0	0	6.09756
CIC/07-334	51	0	0	0	1	8	0	0	0	25	0	0	5	5	0	0	0	0	0	2	1	0	2	0	0	0	7	2	0	0	0	0	0	1	59		CIC/07-334	0	0	0	1.69492	13.5593	0	0	0	42.3729	0	0	8.47458
CIC/07-339	52	0	0	0	1	15	0	0	0	12	0	1	8	6	1	0	0	0	1	1	0	0	1	0	0	1	24	1	0	0	0	0	0	3	76		CIC/07-339	0	0	0	1.31579	19.7368	0	0	0	15.7895	0	1.31579	10.5263
CIC/07-344	53	0	0	0	0	30	0	0	0	17	0	0	3	1	1	0	0	0	0	0	0	0	2	0	0	6	9	0	0	0	0	0	0	2	71		CIC/07-344	0	0	0	0	42.2535	0	0	0	23.9437	0	0	4.22535
CIC/07-350	53.9	0	0	0	2	18	0	0	0	13	0	0	10	0	0	0	0	0	2	0	0	0	2	0	0	2	14	5	0	0	0	0	0	1	69		CIC/07-350	0	0	0	2.89855	26.087	0	0	0	18.8406	0	0	14.4928
CIC/07-349	54	0	0	0	3	26	0	0	0	20	1	0	8	8	4	0	0	0	1	0	0	1	3	0	0	2	26	0	0	1	0	0	0	4	108		CIC/07-349	0	0	0	2.77778	24.0741	0	0	0	18.5185	0.925926	0	7.40741
CIC/07-351	54.1	0	0	0	0	19	0	0	0	9	0	0	14	7	0	0	0	0	2	0	0	0	4	0	0	1	11	0	0	0	0	1	0	4	72		CIC/07-351	0	0	0	0	26.3889	0	0	0	12.5	0	0	19.4444
CIC/07-352	54.2	0	0	0	0	23	0	0	0	8	0	0	11	3	0	0	0	0	1	0	0	0	1	0	0	0	6	2	0	0	0	0	0	1	56		CIC/07-352	0	0	0	0	41.0714	0	0	0	14.2857	0	0	19.6429
CIC/07-353	54.3	0	0	0	1	27	1	3	0	2	2	0	5	0	0	1	0	0	0	1	1	0	4	0	0	0	11	2	0	0	0	0	1	2	64		CIC/07-353	0	0	0	1.5625	42.1875	1.5625	4.6875	0	3.125	3.125	0	7.8125
CIC/07-354	54.4	0	1	0	0	30	0	0	0	17	0	0	3	3	0	0	0	0	1	0	0	0	5	0	0	0	4	0	0	0	0	0	0	2	66		CIC/07-354	0	1.51515	0	0	45.4545	0	0	0	25.7576	0	0	4.54545
CIC/07-355	54.5	0	0	0	0	31	0	0	0	10	0	0	1	4	3	0	cf	0	0	0	0	1	5	0	0	0	0	11	0	0	0	0	0	1	67		CIC/07-355	0	0	0	0	46.2687	0	0	0	14.9254	0	0	1.49254
CIC/07-356	54.6	0	0	0	0	27	0	0	0	11	1	0	11	5	0	0	0	0	1	0	0	0	3	0	0	0	5	2	0	0	0	0	0	2	68		CIC/07-356	0	0	0	0	39.7059	0	0	0	16.1765	1.47059	0	16.1765
CIC/07-357	54.7	1	2	0	0	25	0	0	0	3	1	0	6	0	0	0	0	0	1	1	0	1	1	0	0	0	9	1	0	0	0	0	0	2	54		CIC/07-357	1.85185	3.7037	0	0	46.2963	0	0	0	5.55556	1.85185	0	11.1111
CIC/07-358	54.8	0	0	0	0	17	0	0	0	18	1	0	28	4	0	cf	0	0	0	0	0	0	3	0	0	0	5	3	0	0	0	0	0	3	82		CIC/07-358	0	0	0	0	20.7317	0	0	0	21.9512	1.21951	0	34.1463
CIC/07-359	54.9	0	0	0	0	21	0	0	0	5	0	0	9	1	0	0	0	0	2	1	2	0	0	0	0	1	14	2	0	0	0	0	0	3	61		CIC/07-359	0	0	0	0	34.4262	0	0	0	8.19672	0	0	14.7541
CIC/07-361	55.1	0	0	0	0	12	0	0	0	12	0	0	15	4	0	0	0	0	2	0	3	0	2	0	0	0	11	4	0	0	0	0	0	2	67		CIC/07-361	0	0	0	0	17.9104	0	0	0	17.9104	0	0	22.3881
CIC/07-364	55.5	0	0	0	0	7	0	0	0	5	0	0	41	6	0	0	0	0	3	0	0	0	1	0	0	0	0	5	0	0	0	0	0	2	70		CIC/07-364	0	0	0	0	10	0	0	0	7.14286	0	0	58.5714
CIC/07-365	55.7	0	0	0	0	5	0	0	0	4	1	0	40	4	0	0	0	0	0	0	0	0	0	0	0	2	1	1	0	0	0	0	0	1	59		CIC/07-365	0	0	0	0	8.47458	0	0	0	6.77966	1.69492	0	67.7966
CIC/07-366	55.9	0	0	0	0	6	0	1	0	9	1	0	17	5	0	0	0	0	6	0	0	1	4	0	0	1	13	4	0	0	0	1	0	3	72		CIC/07-366	0	0	0	0	8.33333	0	1.38889	0	12.5	1.38889	0	23.6111
CIC/07-367	56.1	0	0	0	1	10	0	0	0	11	3	0	13	2	0	0	0	0	0	0	0	0	1	0	0	0	7	4	0	0	0	1	0	2	55		CIC/07-367	0	0	0	1.81818	18.1818	0	0	0	20	5.45455	0	23.6364
CIC/07-368	56.3	0	0	0	0	13	0	0	0	1	1	0	31	1	0	0	0	0	3	0	1	0	3	0	0	1	5	1	0	0	0	0	0	2	63		CIC/07-368	0	0	0	0	20.6349	0	0	0	1.5873	1.5873	0	49.2063
CIC/07-372	57.1	0	0	0	0	14	0	0	0	9	0	0	15	6	0	0	0	0	0	0	3	0	1	0	0	0	19	1	0	0	0	2	0	2	72		CIC/07-372	0	0	0	0	19.4444	0	0	0	12.5	0	0	20.8333
CIC/07-377	58.1	0	0	0	0	17	0	0	0	7	1	0	10	2	0	0	0	0	0	0	0	9	1	0	0	0	5	0	0	0	0	3	0	2	57		CIC/07-377	0	0	0	0	29.8246	0	0	0	12.2807	1.75439	0	17.5439
CIC/07-382	59.1	0	0	0	0	4	0	0	0	4	0	0	7	1	0	0	0	0	0	1	0	5	0	0	0	0	5	1	0	0	0	2	0	0	30		CIC/07-382	0	0	0	0	13.3333	0	0	0	13.3333	0	0	23.3333
CIC/07-387	60.1	0	0	0	0	15	0	0	0	7	3	0	15	2	0	0	0	0	0	0	0	5	0	0	0	0	9	0	0	0	0	0	0	3	59		CIC/07-387	0	0	0	0	25.4237	0	0	0	11.8644	5.08475	0	25.4237
CIC/07-389	60.5	0	0	0	0	22	0	0	0	7	0	0	19	0	0	2	0	0	2	0	0	0	0	0	0	2	2	0	0	1	0	0	0	4	61		CIC/07-389	0	0	0	0	36.0656	0	0	0	11.4754	0	0	31.1475
CIC/07-390	60.7	0	0	0	0	16	0	0	0	7	0	0	16	2	0	2	0	0	0	0	0	0	1	0	0	2	1	3	0	0	0	0	0	2	52		CIC/07-390	0	0	0	0	30.7692	0	0	0	13.4615	0	0	30.7692
CIC/07-392	61.1	0	0	0	0	22	0	0	0	10	0	0	6	2	0	3	0	0	0	0	0	0	0	0	0	0	13	2	0	0	0	1	0	0	59		CIC/07-392	0	0	0	0	37.2881	0	0	0	16.9492	0	0	10.1695
CIC/07-393	61.3	0	0	0	0	18	0	0	0	7	0	0	22	0	0	cf	0	0	1	0	0	1	2	0	0	0	5	2	0	1	0	0	0	3	62		CIC/07-393	0	0	0	0	29.0323	0	0	0	11.2903	0	0	35.4839
CIC/07-394	61.5	0	0	0	0	18	0	0	0	2	0	0	21	0	0	1	0	0	1	0	0	0	0	0	0	0	5	4	0	0	0	0	0	3	55		CIC/07-394	0	0	0	0	32.7273	0	0	0	3.63636	0	0	38.1818
CIC/07-395	61.7	0	0	0	0	10	0	0	0	8	0	0	26	0	0	1	0	0	0	0	1	0	1	0	0	0	2	1	0	0	0	0	0	2	52		CIC/07-395	0	0	0	0	19.2308	0	0	0	15.3846	0	0	50
CIC/07-397	62.1	0	0	0	0	19	0	0	0	9	0	0	14	0	0	1	0	0	0	0	2	0	0	0	0	1	6	0	0	0	0	0	0	2	54		CIC/07-397	0	0	0	0	35.1852	0	0	0	16.6667	0	0	25.9259
CIC/07-402	63.1	0	0	0	0	19	0	0	0	4	0	0	15	0	0	0	0	0	0	0	0	0	0	0	0	0	8	1	0	0	0	0	0	5	52		CIC/07-402	0	0	0	0	36.5385	0	0	0	7.69231	0	0	28.8462
CIC/07-407	64	0	0	0	0	12	0	0	0	3	1	0	21	0	0	1	0	0	0	0	0	0	0	0	0	1	8	3	0	2	0	0	0	0	52		CIC/07-407	0	0	0	0	23.0769	0	0	0	5.76923	1.92308	0	40.3846
CIC/07-412	65	0	0	0	0	18	0	0	0	0	0	0	18	8	0	0	0	0	1	0	0	0	0	0	0	0	7	4	0	0	0	0	0	2	58		CIC/07-412	0	0	0	0	31.0345	0	0	0	0	0	0	31.0345
CIC/07-417	66	0	0	0	0	9	0	0	0	10	0	0	21	0	0	0	0	0	0	0	0	0	1	0	0	0	11	4	0	0	0	0	0	0	56		CIC/07-417	0	0	0	0	16.0714	0	0	0	17.8571	0	0	37.5
CIC/07-422	67	0	0	0	0	22	0	0	0	2	0	0	11	4	0	0	0	0	1	0	0	0	0	0	0	0	4	0	0	0	0	0	0	2	46		CIC/07-422	0	0	0	0	47.8261	0	0	0	4.34783	0	0	23.913
CIC/07-427	68	0	0	0	1	15	0	0	0	2	0	0	21	4	0	0	0	0	0	0	0	0	0	0	0	1	10	2	0	0	0	0	0	3	59		CIC/07-427	0	0	0	1.69492	25.4237	0	0	0	3.38983	0	0	35.5932
CIC/07-432	69	0	0	0	0	5	0	0	0	0	0	0	19	2	0	0	0	0	1	1	0	0	0	0	0	1	1	0	0	0	0	0	0	2	32		CIC/07-432	0	0	0	0	15.625	0	0	0	0	0	0	59.375
CIC/07-437	70	0	0	0	0	22	0	0	0	4	0	0	11	1	0	cf	0	0	0	0	cf	0	0	0	0	0	2	3	0	0	0	0	0	3	46		CIC/07-437	0	0	0	0	47.8261	0	0	0	8.69565	0	0	23.913
CIC/07-442	71	0	0	0	0	10	0	0	0	0	0	0	43	0	0	0	0	0	0	0	0	0	0	0	0	0	0	0	0	0	0	0	0	1	54		CIC/07-442	0	0	0	0	18.5185	0	0	0	0	0	0	79.6296
CIC/07-447	72	0	0	0	0	29	0	0	0	2	0	0	18	1	0	cf	0	0	1	0	0	0	2	0	0	0	1	2	0	1	0	0	0	1	58		CIC/07-447	0	0	0	0	50	0	0	0	3.44828	0	0	31.0345
CIC/07-449	72.4	0	0	0	0	15	0	0	0	2	0	0	23	0	0	cf	0	0	0	0	0	0	0	0	0	0	0	0	0	0	0	0	0	1	41		CIC/07-449	0	0	0	0	36.5854	0	0	0	4.87805	0	0	56.0976
CIC/07-450	72.6	0	0	0	2	11	0	0	0	0	0	0	34	0	0	2	0	0	1	0	0	0	0	0	0	0	1	0	0	0	0	0	0	3	54		CIC/07-450	0	0	0	3.7037	20.3704	0	0	0	0	0	0	62.963
CIC/07-451	72.79	0	0	0	0	27	0	0	0	2	1	0	23	0	0	0	0	1	0	0	0	0	0	0	0	0	2	2	0	0	0	0	0	3	61		CIC/07-451	0	0	0	0	44.2623	0	0	0	3.27869	1.63934	0	37.7049
CIC/07-451bis	72.8	0	0	0	0	11	0	0	0	1	0	0	26	0	0	5	0	0	0	0	0	0	0	0	0	0	0	0	0	1	0	0	0	3	47		CIC/07-451bis	0	0	0	0	23.4043	0	0	0	2.12766	0	0	55.3191
CIC/07-452	73	0	0	0	0	21	0	0	0	0	0	0	17	0	0	8	0	0	0	0	0	0	0	0	0	0	1	0	0	0	0	0	0	2	49		CIC/07-452	0	0	0	0	42.8571	0	0	0	0	0	0	34.6939
CIC/07-457	74	0	0	0	0	10	0	0	0	0	0	0	34	0	0	0	0	0	0	0	0	0	0	0	0	2	0	0	0	0	0	0	0	2	48		CIC/07-457	0	0	0	0	20.8333	0	0	0	0	0	0	70.8333
CIC/07-462	75	0	0	0	0	27	0	0	0	7	0	0	10	0	0	3cf	0	0	0	0	0	0	cf	0	0	0	1	0	0	0	0	0	0	4	49		CIC/07-462	0	0	0	0	55.102	0	0	0	14.2857	0	0	20.4082
CIC/07-467	76	0	0	0	0	27	0	0	0	0	0	0	18	0	0	0	0	0	0	0	0	0	0	0	0	0	0	0	0	0	0	0	0	2	47		CIC/07-467	0	0	0	0	57.4468	0	0	0	0	0	0	38.2979
CIC/07-472	77	0	0	0	0	15	0	0	0	8	1	0	20	4	0	1	0	0	0	0	0	0	0	0	0	0	2	1	0	1	0	0	0	1	54		CIC/07-472	0	0	0	0	27.7778	0	0	0	14.8148	1.85185	0	37.037
CIC/07-477	78	0	0	0	0	10	0	0	0	6	0	0	25	0	0	4	0	0	3	1	0	0	0	0	0	0	4	0	0	0	0	0	0	2	55		CIC/07-477	0	0	0	0	18.1818	0	0	0	10.9091	0	0	45.4545
CIC/07-482	79	0	0	0	0	12	0	0	0	0	0	0	29	0	0	7	0	0	0	0	0	0	0	0	0	0	0	0	0	1	0	0	0	3	52		CIC/07-482	0	0	0	0	23.0769	0	0	0	0	0	0	55.7692
CIC/07-487	80	0	0	0	0	11	1	0	0	0	1	0	38	0	0	cf	0	0	0	0	0	0	0	0	0	0	0	2	0	0	0	2	0	0	55		CIC/07-487	0	0	0	0	20	1.81818	0	0	0	1.81818	0	69.0909
CIC/07-492	81	0	0	0	1	19	0	0	0	0	1	0	6	0	0	21	0	0	0	0	0	0	0	0	0	0	0	0	0	1	0	0	0	0	49		CIC/07-492	0	0	0	2.04082	38.7755	0	0	0	0	2.04082	0	12.2449
[truncated: 23 more columns]

## Sheet: phenolithus%
SAMPLE	Height (m)	Sphenolithus anarrhopus	Sphenolithus cf. anarrhopus	Sphenolithus cf. conicus	Sphenolithus cf. conspicuus	Sphenolithus editus	Sphenolithus moriformis gr.	Sphenolithus orphanknollensis	Sphenolithus radians/S.arthuri	Sphenolithus rioi	Sphenolithus villae	Sphenolithus villae(spina corta)	Sphenolithus sp. 4	Sphenolithus sp. 5	Sphenolithus spp.	TOTAL	Percentages within sphenoliths	SAMPLE	Sphenolithus anarrhopus	Sphenolithus cf. anarrhopus	Sphenolithus cf. conicus	Sphenolithus cf. conspicuus	Sphenolithus editus	Sphenolithus moriformis gr.	Sphenolithus orphanknollensis	Sphenolithus radians/S.arthuri	Sphenolithus rioi	Sphenolithus villae	Sphenolithus villae(spina corta)	Sphenolithus sp. 4	Sphenolithus sp. 5	Sphenolithus spp.	TOTAL
CIC/07-1	0.09	13	3	0	0	0	89	0	0	0	0	0	0	0	0	105		CIC/07-1	12.381	2.85714	0	0	0	84.7619	0	0	0	0	0	0	0	0	100
CIC/07-6	1.07	22	0	0	0	0	80	0	0	0	0	0	0	0	0	102		CIC/07-6	21.5686	0	0	0	0	78.4314	0	0	0	0	0	0	0	0	100
CIC/07-11	2.095	13	3	0	0	0	81	0	0	6	0	0	0	0	0	103		CIC/07-11	12.6214	2.91262	0	0	0	78.6408	0	0	5.82524	0	0	0	0	0	100
CIC/07-16	3.265	8	0	0	0	0	93	0	0	4	0	0	0	0	0	105		CIC/07-16	7.61905	0	0	0	0	88.5714	0	0	3.80952	0	0	0	0	0	100
CIC/07-18	3.51	9	0	0	0	0	34	0	0	0	0	0	0	0	0	43		CIC/07-18	20.9302	0	0	0	0	79.0698	0	0	0	0	0	0	0	0	100
CIC/07-20	3.655	7	0	0	0	0	38	0	0	0	0	0	0	0	0	45		CIC/07-20	15.5556	0	0	0	0	84.4444	0	0	0	0	0	0	0	0	100
CIC/07-24	4.045	7	2	0	0	0	88	0	0	1	0	0	0	0	0	98		CIC/07-24	7.14286	2.04082	0	0	0	89.7959	0	0	1.02041	0	0	0	0	0	100
CIC/07-27	5.11	5	4	0	0	0	92	0	0	2	0	0	0	0	0	103		CIC/07-27	4.85437	3.8835	0	0	0	89.3204	0	0	1.94175	0	0	0	0	0	100
CIC/07-32	6.14	3	3	0	0	0	102	0	0	1	0	0	0	0	0	109		CIC/07-32	2.75229	2.75229	0	0	0	93.578	0	0	0.917431	0	0	0	0	0	100
CIC/07-36	6.98	6	2	0	0	0	94	0	0	0	0	0	0	0	0	102		CIC/07-36	5.88235	1.96078	0	0	0	92.1569	0	0	0	0	0	0	0	0	100
CIC/07-42	8.13	2	0	0	0	0	102	0	0	0	0	0	0	0	0	104		CIC/07-42	1.92308	0	0	0	0	98.0769	0	0	0	0	0	0	0	0	100
CIC/07-47	9.11	0	0	0	0	0	111	0	0	0	0	0	0	0	0	111		CIC/07-47	0	0	0	0	0	100	0	0	0	0	0	0	0	0	100
CIC/07-52	10.01	0	0	0	0	0	100	0	0	0	0	0	0	0	0	100		CIC/07-52	0	0	0	0	0	100	0	0	0	0	0	0	0	0	100
CIC/07-58	11	0	0	0	0	0	117	0	0	0	0	0	0	0	0	117		CIC/07-58	0	0	0	0	0	100	0	0	0	0	0	0	0	0	100
CIC/07-65	12.15	0	0	0	0	0	101	0	0	0	0	0	0	0	0	101		CIC/07-65	0	0	0	0	0	100	0	0	0	0	0	0	0	0	100
CIC/07-71	13	0	0	0	0	0	104	0	0	0	0	0	0	0	0	104		CIC/07-71	0	0	0	0	0	100	0	0	0	0	0	0	0	0	100
CIC/07-77	14.1	0	0	0	0	0	100	0	0	0	0	0	0	0	0	100		CIC/07-77	0	0	0	0	0	100	0	0	0	0	0	0	0	0	100
CIC/07-82	14.92	0	0	0	0	0	46	0	0	0	0	0	0	0	0	46		CIC/07-82	0	0	0	0	0	100	0	0	0	0	0	0	0	0	100
CIC/07-88	15.98	0	0	0	0	0	102	0	0	0	0	0	0	0	0	102		CIC/07-88	0	0	0	0	0	100	0	0	0	0	0	0	0	0	100
CIC/07-94	16.95	0	0	0	0	0	96	0	0	0	0	0	0	0	0	96		CIC/07-94	0	0	0	0	0	100	0	0	0	0	0	0	0	0	100
CIC/07-99	18	0	0	0	0	0	98	0	0	0	0	0	0	0	0	98		CIC/07-99	0	0	0	0	0	100	0	0	0	0	0	0	0	0	100
CIC/07-108	19	0	0	0	0	0	48	0	0	0	0	0	0	0	0	48		CIC/07-108	0	0	0	0	0	100	0	0	0	0	0	0	0	0	100
CIC/07-113	20	0	0	0	0	0	49	0	0	0	0	0	0	0	0	49		CIC/07-113	0	0	0	0	0	100	0	0	0	0	0	0	0	0	100
CIC/07-133	23	1	0	0	0	0	100	0	0	0	0	0	0	0	0	101		CIC/07-133	0.990099	0	0	0	0	99.0099	0	0	0	0	0	0	0	0	100
CIC/07-138	24	0	0	0	0	0	100	0	0	0	0	0	0	0	0	100		CIC/07-138	0	0	0	0	0	100	0	0	0	0	0	0	0	0	100
CIC/07-198	31.7	0	0	0	0	0	100	0	0	0	0	0	0	0	0	100		CIC/07-198	0	0	0	0	0	100	0	0	0	0	0	0	0	0	100
CIC/07-211	33	0	0	0	0	0	100	0	0	0	0	0	0	0	0	100		CIC/07-211	0	0	0	0	0	100	0	0	0	0	0	0	0	0	100
CIC/07-222	34.03	0	0	0	0	0	100	0	0	0	0	0	0	0	0	100		CIC/07-222	0	0	0	0	0	100	0	0	0	0	0	0	0	0	100
CIC/07-238	36.13	3	2	2	0	0	97	0	0	0	0	0	0	0	0	104		CIC/07-238	2.88462	1.92308	1.92308	0	0	93.2692	0	0	0	0	0	0	0	0	100
CIC/07-257	38.02	1	0	0	0	0	103	0	0	0	0	0	0	0	0	104		CIC/07-257	0.961538	0	0	0	0	99.0385	0	0	0	0	0	0	0	0	100
CIC/07-269	39.03	1	0	0	0	0	102	0	0	0	0	0	0	0	0	103		CIC/07-269	0.970874	0	0	0	0	99.0291	0	0	0	0	0	0	0	0	100
CIC/07-277	40	0	0	0	0	0	99	0	0	0	0	0	0	0	0	99		CIC/07-277	0	0	0	0	0	100	0	0	0	0	0	0	0	0	100
CIC/07-282	41	0	0	0	0	0	107	0	0	0	0	0	0	0	0	107		CIC/07-282	0	0	0	0	0	100	0	0	0	0	0	0	0	0	100
CIC/07-288	42	0	0	0	0	0	107	0	0	0	0	0	0	0	0	107		CIC/07-288	0	0	0	0	0	100	0	0	0	0	0	0	0	0	100
CIC/07-293	43	0	0	0	0	0	100	0	0	0	0	0	0	0	0	100		CIC/07-293	0	0	0	0	0	100	0	0	0	0	0	0	0	0	100
CIC/07-299	44	0	0	0	0	0	103	0	0	0	0	0	0	0	0	103		CIC/07-299	0	0	0	0	0	100	0	0	0	0	0	0	0	0	100
CIC/07-304	45	2	0	0	0	0	98	0	0	0	0	0	0	0	0	100		CIC/07-304	2	0	0	0	0	98	0	0	0	0	0	0	0	0	100
CIC/07-309	46	0	1	0	0	0	108	0	0	0	0	0	0	0	0	109		CIC/07-309	0	0.917431	0	0	0	99.0826	0	0	0	0	0	0	0	0	100
CIC/07-314	47	0	0	0	0	0	106	0	0	0	0	0	0	0	0	106		CIC/07-314	0	0	0	0	0	100	0	0	0	0	0	0	0	0	100
CIC/07-319	48	0	0	0	0	0	101	0	0	0	0	1	0	0	0	102		CIC/07-319	0	0	0	0	0	99.0196	0	0	0	0	0.980392	0	0	0	100
CIC/07-324	49	0	0	0	0	0	104	0	0	0	0	0	0	0	0	104		CIC/07-324	0	0	0	0	0	100	0	0	0	0	0	0	0	0	100
CIC/07-329	50	0	0	0	0	0	100	0	0	0	0	0	0	0	0	100		CIC/07-329	0	0	0	0	0	100	0	0	0	0	0	0	0	0	100
CIC/07-334	51	0	0	0	0	0	111	0	0	0	0	1	0	0	0	112		CIC/07-334	0	0	0	0	0	99.1071	0	0	0	0	0.892857	0	0	0	100
CIC/07-335	51.2	0	0	0	0	3	96	0	3cf	0	1	1	0	0	0	101		CIC/07-335	0	0	0	0	2.9703	95.0495	0		0	0.990099	0.990099	0	0	0	100
CIC/07-336	51.4	0	0	0	0	0	102	0	2	0	0	0	0	0	0	104		CIC/07-336	0	0	0	0	0	98.0769	0	1.92308	0	0	0	0	0	0	100
CIC/07-337	51.6	0	1	1	0	2	95	0	5	0	0	0	0	0	0	104		CIC/07-337	0	0.961538	0.961538	0	1.92308	91.3462	0	4.80769	0	0	0	0	0	0	100
CIC/07-339	52	0	0	0	0	cf	102	0	3	0	0	0	0	0	0	105		CIC/07-339	0	0	0	0	cf	97.1429	0	2.85714	0	0	0	0	0	0	100
CIC/07-344	53	0	0	0	0	4	94	0	1	0	1	0	0	0	0	100		CIC/07-344	0	0	0	0	4	94	0	1	0	1	0	0	0	0	100
CIC/07-350	53.9	1	0	0	0	0	94	1	5	0	0	0	0	0	0	101		CIC/07-350	0.990099	0	0	0	0	93.0693	0.990099	4.9505	0	0	0	0	0	0	100
CIC/07-349	54	0	0	0	0	0	106	0	2	0	0	0	0	0	0	108		CIC/07-349	0	0	0	0	0	98.1481	0	1.85185	0	0	0	0	0	0	100
CIC/07-351	54.1	0	1	0	0	0	92	2	5	0	1	1	0	0	0	102		CIC/07-351	0	0.980392	0	0	0	90.1961	1.96078	4.90196	0	0.980392	0.980392	0	0	0	100
CIC/07-352	54.2	0	1	0	0	1	87	5	11	0	2	3	0	0	0	110		CIC/07-352	0	0.909091	0	0	0.909091	79.0909	4.54545	10	0	1.81818	2.72727	0	0	0	100
CIC/07-353	54.3	0	0	0	0	2	89	3	2	0	4	0	0	0	0	100		CIC/07-353	0	0	0	0	2	89	3	2	0	4	0	0	0	0	100
CIC/07-354	54.4	0	3	0	3	1	83	3	2	0	0	5	0	0	0	100		CIC/07-354	0	3	0	3	1	83	3	2	0	0	5	0	0	0	100
CIC/07-355	54.5	0	0	0	0	1	82	2	12	0	2	3	0	0	0	102		CIC/07-355	0	0	0	0	0.980392	80.3922	1.96078	11.7647	0	1.96078	2.94118	0	0	0	100
CIC/07-356	54.6	0	1	0	3	0	89	2	6	0	0	3	0	0	0	104		CIC/07-356	0	0.961538	0	2.88462	0	85.5769	1.92308	5.76923	0	0	2.88462	0	0	0	100
CIC/07-357	54.7	0	1	0	0	0	100	1	5	0	3	4	0	0	0	114		CIC/07-357	0	0.877193	0	0	0	87.7193	0.877193	4.38596	0	2.63158	3.50877	0	0	0	100
CIC/07-358	54.8	0	3	2	3	0	81	3	8	0	3	7	0	0	0	110		CIC/07-358	0	2.72727	1.81818	2.72727	0	73.6364	2.72727	7.27273	0	2.72727	6.36364	0	0	0	100
CIC/07-359	54.9	0	0	0	0	0	106	0	4	0	0	5	0	0	0	115		CIC/07-359	0	0	0	0	0	92.1739	0	3.47826	0	0	4.34783	0	0	0	100
CIC/07-361	55.1	0	0	0	0	1	91	1	3	0	1	4	0	0	0	101		CIC/07-361	0	0	0	0	0.990099	90.099	0.990099	2.9703	0	0.990099	3.9604	0	0	0	100
CIC/07-364	55.5	2	0	0	1	0	94	0	1	0	4	2	0	0	0	104		CIC/07-364	1.92308	0	0	0.961538	0	90.3846	0	0.961538	0	3.84615	1.92308	0	0	0	100
CIC/07-367	56.1	0	0	2	0	2	85	2	10	0	0	4	0	0	0	105		CIC/07-367	0	0	1.90476	0	1.90476	80.9524	1.90476	9.52381	0	0	3.80952	0	0	0	100
CIC/07-372	57.1	3	0	0	0	0	83	0	15	0	0	0	0	0	0	101		CIC/07-372	2.9703	0	0	0	0	82.1782	0	14.8515	0	0	0	0	0	0	100
CIC/07-377	58.1	4	0	0	0	0	86	0	14	0	1	0	0	0	0	105		CIC/07-377	3.80952	0	0	0	0	81.9048	0	13.3333	0	0.952381	0	0	0	0	100
CIC/07-382	59.1	2	0	0	0	0	78	0	23	0	0	1	0	0	0	104		CIC/07-382	1.92308	0	0	0	0	75	0	22.1154	0	0	0.961538	0	0	0	100
CIC/07-387	60.1	2	0	0	0	0	89	1	17	0	0	0	0	0	0	109		CIC/07-387	1.83486	0	0	0	0	81.6514	0.917431	15.5963	0	0	0	0	0	0	100
CIC/07-392	61.1	0	0	0	0	0	83	0	16	0	0	2	0	0	0	101		CIC/07-392	0	0	0	0	0	82.1782	0	15.8416	0	0	1.9802	0	0	0	100
CIC/07-397	62.1	5	0	0	0	2	85	1	6	0	1	0	0	0	0	100		CIC/07-397	5	0	0	0	2	85	1	6	0	1	0	0	0	0	100
CIC/07-402	63.1	3	0	0	0	0	82	1	14	0	0	0	0	0	0	100		CIC/07-402	3	0	0	0	0	82	1	14	0	0	0	0	0	0	100
CIC/07-407	64	1	0	0	1	3	120	0	19	0	1	0	0	0	0	145		CIC/07-407	0.689655	0	0	0.689655	2.06897	82.7586	0	13.1034	0	0.689655	0	0	0	0	100
CIC/07-412	65	4	0	0	1	1	85	0	18	0	0	0	0	0	0	109		CIC/07-412	3.66972	0	0	0.917431	0.917431	77.9817	0	16.5138	0	0	0	0	0	0	100
CIC/07-417	66	1	0	0	1	0	100	0	20	0	0	0	0	0	0	122		CIC/07-417	0.819672	0	0	0.819672	0	81.9672	0	16.3934	0	0	0	0	0	0	100
CIC/07-422	67	5	0	0	0	1	105	1	34	0	0	0	0	0	0	146		CIC/07-422	3.42466	0	0	0	0.684932	71.9178	0.684932	23.2877	0	0	0	0	0	0	100
CIC/07-427	68	0	0	0	0	1	92	1	23	0	0	1	0	0	0	118		CIC/07-427	0	0	0	0	0.847458	77.9661	0.847458	19.4915	0	0	0.847458	0	0	0	100
CIC/07-432	69	3	0	0	1	1	95	1	23	0	0	0	0	0	0	124		CIC/07-432	2.41935	0	0	0.806452	0.806452	76.6129	0.806452	18.5484	0	0	0	0	0	0	100
CIC/07-437	70	2	0	0	0	2	128	2	22	0	0	0	0	0	0	156		CIC/07-437	1.28205	0	0	0	1.28205	82.0513	1.28205	14.1026	0	0	0	0	0	0	100
CIC/07-442	71	4	0	0	0	2	101	0	19	0	0	2	0	0	0	128		CIC/07-442	3.125	0	0	0	1.5625	78.9062	0	14.8438	0	0	1.5625	0	0	0	100
CIC/07-447	72	0	0	0	4	4	84	1	35	0	0	2	0	0	2	132		CIC/07-447	0	0	0	3.0303	3.0303	63.6364	0.757576	26.5152	0	0	1.51515	0	0	1.51515	100
CIC/07-451	72.79	4	0	0	0	1	71	0	34	0	0	0	3	0	0	113		CIC/07-451	3.53982	0	0	0	0.884956	62.8319	0	30.0885	0	0	0	2.65487	0	0	100
CIC/07-457	74	0	0	0	0	1	85	1	11	0	0	0	1	0	0	99		CIC/07-457	0	0	0	0	1.0101	85.8586	1.0101	11.1111	0	0	0	1.0101	0	0	100
CIC/07-462	75	2	0	0	0	1	86	0	16	0	0	0	0	0	0	105		CIC/07-462	1.90476	0	0	0	0.952381	81.9048	0	15.2381	0	0	0	0	0	0	100
CIC/07-467	76	2	0	0	0	2	91	0	18	0	0	0	0	0	0	113		CIC/07-467	1.76991	0	0	0	1.76991	80.531	0	15.9292	0	0	0	0	0	0	100
CIC/07-472	77	4	0	0	1	1	76	0	22	0	1	0	0	0	0	105		CIC/07-472	3.80952	0	0	0.952381	0.952381	72.381	0	20.9524	0	0.952381	0	0	0	0	100
CIC/07-477	78	0	0	0	0	0	84	0	13	0	0	0	0	1	1	99		CIC/07-477	0	0	0	0	0	84.8485	0	13.1313	0	0	0	0	1.0101	1.0101	100
CIC/07-482	79	0	0	0	0	2	66	6	29	0	0	0	0	0	0	103		CIC/07-482	0	0	0	0	1.94175	64.0777	5.82524	28.1553	0	0	0	0	0	0	100
CIC/07-487	80	3	0	0	0	1	77	2	20	0	0	0	0	2	0	105		CIC/07-487	2.85714	0	0	0	0.952381	73.3333	1.90476	19.0476	0	0	0	0	1.90476	0	100
CIC/07-492	81	1	0	0	0	0	60	1	28	0	0	0	0	0	0	90		CIC/07-492	1.11111	0	0	0	0	66.6667	1.11111	31.1111	0	0	0	0	0	0	100

## Sheet: n-mm2
sample	Height (m)	Biantholithusspp.	Biantholithussp.1	Biscutum cf.	Biscutum spp.	Braarudosphaera spp.	Calcidiscus kingii	Calcidiscus cf. kingii (ellittico)	Campylosphaera eodela/dela	Cepekiella lumina	Chiasmolithus californicus (13-21μm)	Chiasmolithus consuetus (5-12μm)	Chiasmolithusconsuetus/C. danicus	Chiasmolithus grandis	Chiasmolithus bidens/C.solitus	Chiasmolithus titus	Chiasmolithusspp.	TOT Chiasmolithus	Chiphragmalithus spp. (circolare)	Chiphragmalithus spp. (ellitico)	Clausicoccus spp.	Coccolithus eopelagicus (16-20μm)	Coccolithus jugatum	Coccolithus miopelagicus (13-16μm)	Coccolithus pelagicus (6-13μm)	TOT Coccolithus	Cruciplacolithus latipons	Cruciplacolithus tenuis	Cruciplacolithus sp.1	Discoaster anartios	Discoaster araneus	Discoaster barbadiensis	Discoaster binodosus	Discoaster delicatus	Discoaster diastypus	Discoaster diastypussalisburgensis	Discoaster kuepperi	Discoaster kuepperi/D. salisburgensis	Discoaster lenticularis	Discoaster lodoensis	Discoaster mahmoudii	Discoaster medious	Discoaster mohleri	Discoaster multiradiatus	Discoaster mohleri/D. nobilis gr.	Discoaster nobilis gr.	Discoaster nonaradiatus.	Discoaster robustus	Discoaster salisburgensis
CIC/07-1	9	1	0	0	0	0	0	0	0	0	0	0	0	0	0	0	1	1	0	0	0	0	0	0	100	100	0	0	0	0	0	0	0	0	0	0	0	0	0	0	0	0	2	0	0	0	0	0	0
CIC/07-6	107	2	0	1	0	1	0	0	0	0	0	4	0	0	1	0	0	5	0	0	0	0	0	1	142	143	0	0	0	0	0	0	0	1	0	0	0	0	0	0	0	0	3	0	0	0	0	0	0
CIC/07-11	209.5	0	0	0	0	1	0	0	0	0	0	3	0	0	0	0	0	3	0	0	0	0	0	1	188	189	0	1	0	0	0	0	0	0	0	0	0	0	0	0	0	0	1	0	0	0	0	0	0
CIC/07-16	326.5	0	0	1	0	0	0	0	0	0	0	2	0	0	1	0	0	3	0	0	0	0	0	0	157	157	0	1	0	0	0	0	0	0	0	0	0	0	0	0	0	0	3	0	0	1	0	0	0
CIC/07-18	351	0	0	0	0	0	0	0	0	0	1	1	0	0	1	0	0	3	0	0	0	0	0	2	98	100	0	fc	0	0	0	0	0	0	0	0	0	0	0	0	0	0	1	0	0	0	0	0	0
CIC/07-20	365.5	0	0	0	0	0	0	0	0	0	0	2	0	0	0	0	0	2	0	0	0	0	0	0	127	127	0	1	0	0	0	0	0	0	0	0	0	0	0	0	0	0	0	0	0	1	0	0	0
CIC/07-24	404.5	0	0	0	0	0	0	0	0	2	1	0	0	0	0	0	0	1	0	0	0	0	1	0	273	274	0	0	0	0	0	0	0	0	0	0	0	0	0	0	0	0	2	0	0	0	0	0	0
CIC/07-27	511	1	0	0	0	0	0	0	0	0	1	2	0	0	1	0	0	4	0	0	0	0	0	0	135	135	0	0	0	0	0	0	0	0	0	0	0	0	0	0	0	0	0	0	1	0	0	0	0
CIC/07-32	614	1	0	0	0	0	0	0	0	2	1	1	0	0	0	0	0	2	0	0	0	0	0	0	97	97	0	0	0	0	0	0	0	0	0	0	0	0	0	0	0	0	0	0	0	0	0	0	0
CIC/07-36	698	2	3	0	0	0	0	0	0	0	0	1	0	0	0	0	0	1	0	0	0	0	0	1	127	128	0	0	0	0	0	0	0	0	0	0	0	0	0	0	0	0	0	0	0	0	0	0	0
CIC/07-41	807	1	0	1	0	0	0	0	0	0	0	5	0	0	0	0	0	5	0	0	0	0	0	4	150	154	0	0	0	0	0	0	0	0	0	0	0	0	0	0	0	0	0	0	0	0	0	0	0
CIC/07-42	813	0	1	0	0	1	0	0	0	0	0	0	0	0	0	0	0	0	0	0	0	0	0	0	98	98	0	0	0	0	0	0	0	0	0	0	0	0	0	0	0	0	0	0	0	0	0	0	0
CIC/07-43	833	0	0	0	0	0	0	0	0	0	0	0	0	0	0	0	0	0	0	0	0	0	0	5	177	182	0	0	0	0	0	0	0	1	0	0	0	0	0	0	0	0	0	0	0	0	0	0	0
CIC/07-44	851	1	1	0	0	0	0	0	0	0	0	1	0	0	0	0	0	1	0	0	0	0	0	0	70	70	0	0	0	0	0	0	0	0	0	0	0	0	0	0	0	0	0	0	0	0	0	0	0
CIC/07-45	875	1	0	0	0	0	0	0	0	0	fc	2	0	0	0	0	0	2	0	0	0	fc	0	0	150	150	0	0	0	0	0	0	0	1	0	0	0	0	0	0	0	0	0	0	0	0	0	0	0
CIC/07-47	911	1	0	0	0	0	0	0	0	3	0	1	0	0	0	0	0	1	0	0	0	0	1	11	204	216	0	1	0	0	0	0	0	0	0	0	0	0	0	0	0	0	3	0	0	0	0	0	0
CIC/07-52	1001	0	0	0	0	0	0	0	0	0	0	0	0	0	0	0	0	0	0	0	0	0	1	4	137	142	0	0	0	0	0	0	0	4	0	0	0	0	0	0	0	0	0	cf	0	1	0	0	0
CIC/07-58	1100	1	1	0	0	0	0	0	0	2	1	0	1	0	1	0	0	3	0	0	0	0	0	1	154	155	0	0	0	0	0	0	0	0	0	0	0	0	0	0	0	0	1	1	0	0	0	0	0
CIC/07-65	1215	1	0	1	0	0	0	0	0	1	0	0	0	0	1	0	0	1	0	0	0	0	0	2	177	179	0	1	1	0	0	0	0	1	0	0	0	0	0	0	0	0	1	2	0	0	0	0	0
CIC/07-71	1300	2	0	0	0	0	0	0	1	1	fc	1	0	0	0	0	0	1	0	0	0	0	0	2	157	159	0	0	0	0	0	0	0	2	0	0	0	0	1	0	0	0	0	5	0	0	0	0	0
CIC/07-77	1410	0	0	0	0	0	0	0	0	0	0	1	0	0	0	0	0	1	0	0	0	0	0	0	134	134	0	0	0	0	0	0	0	2	0	0	0	0	1	0	0	0	2	2	0	0	0	0	0
CIC/07-79	1452	0	0	0	0	0	0	0	1	0	0	0	0	0	0	0	0	0	0	0	0	0	0	1	106	107	0	0	0	0	0	0	0	0	0	0	0	0	0	0	0	0	0	3	0	0	0	0	0
CIC/07-82	1492	0	0	2	0	0	0	0	0	0	1	0	0	0	1	0	0	2	0	0	0	0	0	2	117	119	0	0	0	0	0	0	0	0	0	0	0	0	1	0	0	0	1	12	0	1	0	0	0
CIC/07-88	1598	1	0	0	0	0	0	0	0	1	0	2	0	0	0	0	0	2	0	0	0	0	0	1	114	115	0	0	0	0	0	0	0	0	0	0	0	0	0	0	0	0	0	5	0	0	0	0	0
CIC/07-94	1695	1	1	0	0	0	0	0	0	0	1	1	0	0	1	0	0	3	0	0	0	0	0	fc	113	113	0	1	0	0	0	0	0	1	0	0	0	0	1	0	0	0	2	4	0	0	0	0	0
CIC/07-99	1800	1	0	0	0	0	0	0	0	1	0	0	0	0	0	0	0	0	0	0	0	0	2	fc	116	118	0	0	0	0	0	0	0	1	0	0	0	0	0	0	0	0	0	6	0	0	0	0	0
CIC/07-105	1852	0	0	1	0	0	0	0	0	0	fc	1	0	0	1	0	0	2	0	0	0	0	0	2	98	100	0	0	0	0	0	0	0	0	0	0	0	0	0	0	0	0	0	1	0	0	0	0	0
CIC/07-108	1900	0	0	0	0	0	0	0	0	1	fc	fc	0	0	fc	0	0	0	0	0	0	0	0	1	154	155	0	0	0	0	0	0	0	1	0	0	0	0	1	0	0	0	0	2	0	0	0	0	0
CIC/07-113	2000	1	0	0	0	0	0	0	1	0	0	0	0	0	0	0	0	0	0	0	0	0	0	2	144	146	0	0	0	0	0	0	0	0	0	0	0	0	3	0	0	0	0	2	0	0	0	0	0
CIC/07-122	2099	0	0	0	0	0	0	0	1	1	0	0	0	0	0	0	0	0	0	0	0	0	0	0	60	60	0	0	0	0	0	0	0	0	0	0	0	0	0	0	0	0	0	9	0	0	0	0	0
CIC/07-127	2200	0	0	0	0	0	0	0	0	0	0	0	0	0	0	0	0	0	0	0	0	0	0	0	108	108	0	0	0	0	0	0	0	1	0	0	0	0	0	0	0	0	0	4	0	0	0	0	0
CIC/07-133	2300	fc	0	0	0	1	0	0	0	1	0	0	0	0	fc	0	0	0	0	0	0	0	0	fc	111	111	0	0	0	0	0	0	0	1	0	0	0	0	1	0	0	0	0	1	0	0	0	0	0
CIC/07-138	2400	3	0	0	0	0	0	0	0	0	0	0	0	0	0	0	0	0	0	0	0	0	0	1	130	131	0	0	0	0	0	0	0	0	0	0	0	0	0	0	0	0	1	1	0	1	0	0	0
CIC/07-143	2500	1	0	0	0	0	0	0	0	0	fc	0	0	0	0	0	0	0	0	0	0	0	0	0	140	140	0	0	0	0	0	0	0	0	0	0	0	0	0	0	0	0	0	3	0	0	0	0	0
CIC/07-148	2600	1	0	0	0	0	0	0	0	1	0	fc	0	0	1	0	0	1	0	0	0	0	0	3	137	140	0	0	0	0	0	0	0	0	0	0	0	0	0	0	0	0	0	1	0	0	0	0	0
CIC/07-153	2700	0	0	0	0	0	0	0	1	1	0	0	0	0	0	0	0	0	0	0	0	0	0	0	71	71	0	1	0	0	0	0	0	0	0	0	0	0	1	0	0	0	0	6	0	0	0	0	0
CIC/07-158	2800	0	0	0	0	0	0	0	2	0	fc	5	0	0	0	0	0	5	0	0	0	0	0	0	142	142	0	0	0	0	0	0	0	0	0	0	0	0	1	0	0	0	0	1	0	0	0	0	0
CIC/07-162	2870	0	0	0	0	3	0	0	0	0	0	2	0	0	0	0	0	2	0	0	0	0	0	2	129	131	0	0	0	0	0	0	0	0	0	0	0	0	0	0	0	0	0	7	0	2	0	0	0
CIC/07-163	2875	0	0	0	0	0	0	0	0	0	0	0	0	0	0	0	0	0	0	0	0	0	0	0	0	0	0	0	0	0	0	0	0	0	0	0	0	0	0	0	0	0	0	0	0	0	0	0	0
CIC/07-164	2880	0	0	0	0	0	0	0	0	0	0	0	0	0	0	0	0	0	0	0	0	0	0	0	0	0	0	0	0	0	0	0	0	0	0	0	0	0	0	0	0	0	0	0	0	0	0	0	0
CIC/07-165	2885	0	0	0	0	0	0	0	0	0	0	2	0	0	0	0	0	2	0	0	0	0	0	0	6	6	0	0	0	0	0	0	0	0	0	0	0	0	1	0	0	0	0	0	0	0	0	0	0
CIC/07-166	2890	0	0	0	1	1	0	0	0	0	0	0	0	0	1	0	0	1	0	0	0	0	0	3	68	71	0	0	0	0	0	0	1	1	0	0	cf	0	2	0	0	0	4	25	0	0	0	0	0
CIC/07-167	2895	0	0	0	0	0	0	0	0	0	0	0	0	0	0	0	0	0	0	0	0	0	0	0	12	12	0	0	0	1	0	0	0	0	0	0	0	0	0	0	0	0	0	2	0	0	0	0	1
CIC/07-168	2900	0	0	0	0	0	0	0	0	0	0	0	0	0	0	0	0	0	0	0	0	0	0	1	193	194	0	0	0	0	0	0	0	0	0	0	0	0	2	0	0	0	0	1	0	1	0	0	0
CIC/07-171	2915	2	0	0	3	1	0	0	0	0	0	2	0	0	0	0	0	2	0	0	0	0	0	5	143	148	0	0	0	0	0	0	0	0	0	0	0	0	0	0	0	0	0	1	0	0	0	0	0
CIC/07-172	2920	0	1	0	0	1	0	0	0	0	0	2	0	0	0	0	0	2	0	0	0	0	0	4	149	153	0	0	0	0	0	0	0	0	0	0	0	0	2	0	0	0	1	5	0	2	0	0	0
CIC/07-173	2925	0	0	0	0	1	0	0	0	0	0	1	0	0	0	0	0	1	0	0	0	0	0	8	141	149	0	0	0	0	0	0	0	0	0	0	0	0	0	0	0	0	1	4	0	0	0	0	1
CIC/07-175	2940	1	1	0	1	1	0	0	0	0	0	0	0	0	0	0	0	0	0	0	0	0	0	9	125	134	0	1	0	0	6	0	0	0	0	0	0	0	0	0	0	0	0	3	0	0	0	0	0
CIC/07-181	3000	1	0	0	0	0	0	0	0	0	0	1	0	0	0	0	0	1	0	0	0	0	0	3	157	160	0	0	0	0	3	0	0	0	0	0	0	0	2	0	0	0	0	4	0	0	0	0	0
CIC/07-191	3100	0	0	0	0	0	0	0	0	1	0	0	0	0	0	0	0	0	0	0	0	0	0	9	150	159	0	0	0	1	3	0	0	1	0	0	0	0	0	0	0	0	0	10	0	0	0	0	1
CIC/07-198	3170	0	0	0	0	0	0	0	1	1	0	1	0	0	0	0	0	1	0	0	0	0	0	7	163	170	0	1	0	0	0	0	1cf	0	0	0	0	0	0	0	0	0	1	5	0	0	0	0	0
CIC/07-201	3203	0	0	0	0	0	0	0	0	0	0	0	0	0	0	0	0	0	0	0	0	0	0	4	162	166	0	0	0	0	1	0	0	1	0	0	0	0	1	0	0	0	3	6	0	1	0	0	0
CIC/07-211	3300	0	0	0	0	0	1	0	0	1	0	1	0	0	0	1	0	2	0	0	0	0	0	2	118	120	0	0	0	0	0	0	0	1	0	0	0	0	1	0	0	0	0	1	0	0	0	0	0
CIC/07-222	3403	0	1	0	0	0	0	0	0	0	0	1	0	0	0	0	0	1	0	0	0	fc	0	1	124	125	0	0	0	0	0	0	0	0	0	0	0	0	0	0	0	0	2	2	0	0	0	0	0
CIC/07-228	3502	1	1	0	0	0	0	0	0	1	0	1	0	0	0	0	0	1	0	0	0	0	0	1	175	176	0	0	0	0	0	0	0	0	0	0	0	0	0	0	0	0	1	1	0	1	0	0	4
CIC/07-238	3613	0	0	0	0	0	0	0	fc	1	0	2	0	0	fc	0	0	2	0	0	0	0	0	4	125	129	0	0	0	0	0	0	0	0	0	0	0	0	0	0	0	0	0	7	0	2	0	0	1
CIC/07-247	3709	0	0	0	0	0	0	0	0	0	0	1	0	0	fc	0	0	1	0	0	0	1	0	1	115	117	1	0	1	0	0	0	0	0	0	0	0	0	1	0	0	0	0	3	0	0	0	0	0
CIC/07-257	3802	0	fc	0	fc	0	fc	0	0	0	0	fc	0	0	fc	0	0	0	0	0	0	0	0	2	104	106	0	0	0	0	0	0	0	0	0	0	cf	0	1	0	0	0	1	4	0	0	0	0	0
CIC/07-269	3903	0	2	1	0	1	0	0	1	1	0	1	0	0	1	0	0	2	0	0	0	0	1	3	87	91	0	0	0	0	0	0	0	0	0	0	0	0	1	0	0	0	cf	1	0	1	0	0	5
CIC/07-277	4000	0	0	0	0	0	0	0	0	0	0	0	0	0	1	0	0	1	0	0	0	0	0	0	70	70	0	0	1	0	0	0	0	0	0	0	0	0	0	0	0	0	0	0	0	0	0	0	2
CIC/07-282	4100	0	0	0	0	fc	1	0	1	0	0	0	0	0	fc	0	0	0	0	0	0	0	fc	1	52	53	0	0	0	0	0	0	2	0	0	0	0	2	3	0	0	0	0	4	0	1	1	0	2
CIC/07-288	4200	0	1	1	0	fc	0	0	2	1	0	fc	0	0	0	0	0	0	0	0	0	0	1	1	75	77	0	0	0	0	0	0	0	0	0	1	0	0	1	0	0	0	0	1	0	0	0	0	1
CIC/07-293	4300	3	0	0	0	0	0	0	0	1	fc	0	0	0	0	0	0	0	0	0	1	1	0	2	72	75	0	fc	0	0	0	0	0	0	0	3	0	0	0	0	0	0	2	3	0	0	0	0	4
CIC/07-299	4400	0	1	0	0	0	0	0	1	0	0	0	0	0	1	0	0	1	0	0	0	0	0	0	101	101	0	0	0	0	0	0	2	0	1	0	0	0	0	0	0	0	0	2	0	0	0	0	10
CIC/07-304	4500	1	0	0	0	0	0	0	4	0	0	1	0	0	1	0	0	2	0	0	0	0	1	2	81	84	0	0	0	0	0	0	0	0	0	0	0	1	1	0	0	0	0	1	0	0	0	0	3
CIC/07-309	4600	0	2	0	0	0	0	0	0	0	1	0	0	0	1	0	0	2	0	0	0	0	1	3	53	57	0	0	0	0	0	0	1	0	0	0	0	0	1	0	0	0	0	0	0	1	0	0	4
CIC/07-314	4700	0	fc	0	1	0	0	0	1	1	0	3	0	0	0	0	0	3	0	0	0	0	0	2	117	119	0	0	0	0	0	0	2	0	3	1	cf	1	2	0	0	0	0	2	0	0	0	0	2
CIC/07-319	4800	0	0	0	0	1	0	0	2	1	0	0	0	0	0	0	1	1	0	0	0	0	0	2	149	151	0	0	0	0	0	0	1	0	4	0	3	4	1	0	0	0	0	1	0	0	1	0	5
CIC/07-324	4900	1	1	0	0	0	0	0	0	0	0	3	0	0	0	0	0	3	0	0	0	0	0	0	68	68	0	0	0	0	0	0	1	0	0	0	0	0	2	0	0	0	0	0	0	cf	0	0	4
CIC/07-329	5000	0	0	0	0	1	0	0	1	0	0	2	0	0	1	1	0	4	0	0	0	0	1	3	94	98	0	0	0	0	0	0	0	0	1	0	0	0	0	0	0	0	0	0	0	0	0	0	3
CIC/07-334	5100	0	0	0	0	1	0	0	1	1	2	3	0	0	0	0	0	5	0	0	1	0	0	5	90	95	0	0	0	0	0	0	3	0	1	0	0	2	0	0	0	0	1	0	0	0	0	0	1
CIC/07-339	5200	0	0	0	0	0	0	0	0	1	1	5	0	0	1	0	0	7	0	0	0	0	0	7	42	49	0	0	0	0	0	0	1	0	1	0	0	2	0	0	0	0	0	0	0	0	0	0	4
CIC/07-344	5300	0	0	0	0	0	0	0	1	1	0	6	0	0	0	0	0	6	0	0	0	0	1	2	63	66	0	0	0	0	0	0	3	0	1	0	0	0	0	0	0	0	0	0	0	0	1	1	3
CIC/07-350	5390	1	0	0	0	0	0	0	4	2	0	3	0	0	1	0	0	4	0	2	0	0	2	0	62	64	0	0	0	0	0	1	2	0	1	2	4	0	0	0	0	0	0	0	0	0	0	0	2
CIC/07-349	5400	0	0	1	0	0	1	0	1	1	0	3	0	0	0	0	0	3	0	0	0	0	0	8	64	72	0	0	0	0	0	0	0	0	3	0	4cf	0	2	0	0	0	0	1	0	1	0	1	7
CIC/07-351	5410	1	0	0	0	1	0	1	1	3	0	fc	0	0	0	1	0	1	0	0	0	0	1	5	80	86	0	0	0	0	0	0	2	0	1	0	3	3	0	0	0	0	0	1	0	2	0	1	3
CIC/07-352	5420	0	0	0	0	0	1	0	0	1	0	3	0	0	0	1	0	4	0	0	0	0	0	6	94	100	0	0	0	0	0	0	3	0	3	1	1	2	0	0	0	0	0	0	0	0	0	0	3
CIC/07-353	5430	0	0	0	0	1	3	0	3	0	0	8	0	0	0	0	0	8	0	0	0	0	1	8	99	108	0	0	0	0	0	cf	10	0	0	1	2	0	1	0	0	0	1	0	0	2	0	0	4
CIC/07-354	5440	0	0	0	1	1	0	0	1	0	0	4	0	0	1	0	0	5	0	1	0	2	0	3	65	70	0	0	1	0	0	0	3	0	9	0	0	0	0	0	0	0	1	0	0	2	0	0	1
CIC/07-355	5450	0	0	0	1	2	0	0	0	3	0	3	0	0	0	2	0	5	0	0	0	0	1	10	59	70	0	0	0	0	0	0	1	0	0	0	0	0	1	cf	0	0	0	0	0	1	0	0	3
CIC/07-356	5460	0	0	0	0	0	0	0	1	0	0	5	0	0	0	0	0	5	0	0	1	0	0	7	56	63	0	0	0	0	0	0	4	0	2	0	2	1	0	0	0	0	1	0	0	1	1	0	0
CIC/07-357	5470	0	0	0	0	0	1	0	0	1	0	6	0	0	0	1	1	8	0	0	0	0	0	7	59	66	0	0	0	0	0	0	3	0	0	0	2	0	0	0	0	0	0	0	0	0	0	0	2
CIC/07-358	5480	0	0	0	1	0	1	0	1	2	0	5	0	0	0	0	1	6	0	0	0	0	0	6	45	51	0	0	1	0	0	0	2	0	3	1	5	1	0	cf	0	0	0	0	0	0	0	0	0
CIC/07-359	5490	0	1	0	1	1	0	0	2	1	0	2	0	0	0	0	0	2	0	0	0	0	0	8	37	45	0	0	0	0	0	0	4	0	0	0	3	1	0	0	0	0	1	0	0	0	0	0	4
CIC/07-361	5510	1	0	0	0	1	0	0	0	3	0	0	2	0	0	0	0	2	0	0	0	0	0	4	39	43	0	0	0	0	0	0	1	0	2	2	5	0	0	0	0	0	0	0	0	0	0	0	3
CIC/07-367	5610	0	0	0	0	1	1	0	3	2	0	0	0	0	0	0	0	0	0	0	0	0	1	4	78	83	0	0	0	0	0	cf	1	0	1	0	3	1	0	0	0	0	0	0	0	1	0	0	1
CIC/07-372	5710	0	0	0	0	5	0	0	0	1	0	9	0	0	0	0	0	9	0	0	0	0	0	4	50	54	0	0	0	0	0	0	4	0	3	0	3	1	1	0	0	0	0	1	0	1	1	0	2
CIC/07-377	5810	1	0	0	0	0	0	0	0	1	0	1	0	0	0	0	0	1	0	0	0	0	0	7	57	64	0	0	0	0	0	0	1	0	1	0	0	1	1	0	0	0	0	3	0	1	0	0	1
CIC/07-382	5910	2	0	0	0	0	0	0	2	6	0	2	0	0	0	0	0	2	0	1	0	0	1	5	57	63	0	0	0	0	0	0	1	0	1	1	2	0	0	0	0	0	0	0	2	0	0	0	2
CIC/07-387	6010	0	0	0	0	5	0	0	0	3	0	0	0	0	fc	0	0	0	0	0	0	1	0	7	49	57	0	0	0	0	0	0	2	0	1	0	8	2	0	0	0	0	0	1	0	0	0	0	2
CIC/07-389	6050	0	0	0	0	0	fc	0	0	2	0	4	0	0	0	0	0	4	cf	4	fc	0	0	2	52	54	0	0	0	0	0	0	0	0	0	0	1	0	0	cf	0	0	cf	0	0	0	0	0	1
CIC/07-392	6110	0	0	0	0	1	0	0	0	0	0	1	0	0	fc	1	0	2	0	0	0	0	0	0	41	41	0	0	0	0	0	0	3	0	1	0	1	0	0	cf	0	0	0	0	0	0	0	0	4
CIC/07-393	6130	0	0	0	0	0	0	0	1	1	0	3	0	0	0	0	0	3	0	2	2	2	0	3	42	47	0	0	0	0	0	0	4	0	4	0	7	0	0	0	0	0	0	0	0	0	0	0	0
CIC/07-395	6170	0	0	0	0	1	0	0	1	2	0	7	0	1	2	0	0	10	0	2	0	0	0	4	38	42	1	0	0	0	0	0	3	0	3	0	8	0	0	0	0	0	0	0	0	0	0	0	1
CIC/07-397	6210	1	1	0	0	0	0	0	1	1	0	2	0	0	0	1	0	3	0	0	0	0	0	3	38	41	0	0	0	0	0	0	3	0	1	0	2	0	0	0	0	0	0	cf	0	0	0	0	0
CIC/07-402	6310	0	1	0	0	0	1	0	0	5	0	2	0	0	1	1	0	4	0	0	0	0	0	5	49	54	0	0	0	0	0	0	3	0	0	0	0	0	0	0	0	0	0	0	0	3	0	0	2
CIC/07-407	6400	0	3	0	0	0	2	0	1	1	0	3	0	0	0	0	0	3	0	1	0	0	1	6	26	33	0	0	0	0	0	0	3	0	0	1	3	0	0	0	0	0	0	0	0	0	0	0	3
CIC/07-412	6500	0	0	0	0	0	0	0	2	4	fc	3	0	0	0	0	0	3	0	0	0	fc	1	6	51	58	0	0	0	0	0	0	2	0	0	0	2	2	0	0	0	0	0	0	0	0	0	0	4
CIC/07-417	6600	0	1	0	0	1	0	0	0	3	0	2	0	0	0	1	0	3	0	0	0	0	0	7	46	53	0	0	0	0	0	0	2	0	3	2	6	0	0	0	0	0	0	0	0	0	0	0	4
CIC/07-422	6700	0	2	0	0	2	0	0	0	1	0	2	0	0	0	0	0	2	0	0	0	0	0	1	36	37	0	0	0	0	0	0	7	0	1	0	5	0	0	0	0	0	1	0	0	0	0	0	0
CIC/07-427	6800	2	1	0	0	2	0	0	0	3	0	4	0	0	0	0	0	4	2	0	0	0	fc	5	34	39	0	0	0	0	0	0	2	0	0	0	5	0	0	0	0	0	0	0	0	0	1	0	2
CIC/07-432	6900	0	4	0	0	0	0	0	0	4	0	3	0	0	0	0	0	3	0	1	0	1	4	5	22	32	0	0	0	0	0	0	0	0	0	0	4	0	0	0	0	0	0	0	0	0	0	0	0
CIC/07-437	7000	0	3	0	0	2	1	0	0	2	0	6	0	0	0	0	0	6	0	0	0	0	0	0	43	43	0	0	0	0	0	0	4	0	1	0	7	0	0	0	0	0	0	0	0	0	1	0	1
CIC/07-442	7100	0	1	0	0	1	1	0	0	1	0	4	0	0	0	0	0	4	0	1	0	0	2	2	48	52	0	0	0	0	0	0	0	0	0	0	11	0	0	0	0	0	0	0	0	0	0	0	0
CIC/07-447	7200	0	2	0	0	0	0	0	2	0	2	0	0	1	0	0	0	3	2	1	1	0	2	6	61	69	0	0	0	0	0	0	9	0	1	0	7	0	0	0	0	0	0	0	0	0	1	0	0
CIC/07-449	7240	0	0	0	0	0	0	0	0	1	0	2	0	0	fc	0	0	2	1	0	0	1	0	3	41	45	0	0	0	0	0	0	2	0	0	0	13	0	0	0	0	0	0	0	0	0	0	0	0
CIC/07-450	7260	1	0	0	0	0	0	0	1	0	0	2	0	0	1	0	0	3	0	0	0	0	0	2	64	66	0	0	0	0	0	0	2	0	0	0	14	0	0	0	0	0	0	0	0	0	0	0	0
CIC/07-451	7280	0	1	0	0	0	3	1	0	1	0	3	0	0	0	0	0	3	1	0	0	0	0	1	56	57	0	0	0	0	0	0	1	0	1	0	9	0	0	0	0	0	0	0	0	0	0	0	0
CIC/07-451 bis	7279	1	0	0	0	1	4	0	5	1	0	13	0	0	0	2	0	15	0	1	0	0	1	2	81	84	0	0	0	0	0	0	1	0	1	0	13	0	0	3	0	0	0	0	0	0	0	0	0
CIC/07-452	7380	0	0	0	0	1	1	0	0	0	0	0	0	0	0	1	0	1	1	1	0	0	0	3	17	20	0	0	0	0	0	0	3	0	0	0	7	0	0	cf	0	0	0	0	0	0	0	0	0
CIC/07-457	7400	0	1	0	0	2	0	0	0	1	0	3	0	0	0	0	0	3	0	0	0	0	0	1	19	20	0	0	0	0	0	0	0	0	0	0	4	0	0	0	0	0	0	0	0	0	0	0	0
CIC/07-462	7500	0	0	0	0	2	0	0	0	1	0	0	0	0	0	0	0	0	0	0	0	0	1	2	9	12	0	0	0	0	0	0	0	1	0	0	2	0	0	0	0	0	0	0	0	0	0	0	0
CIC/07-467	7600	0	fc	0	0	fc	0	0	0	1	0	1	0	0	0	0	0	1	1	0	0	0	1	2	19	22	0	0	0	0	0	0	1	0	0	0	3	0	0	0	0	0	0	0	0	0	0	0	0
CIC/07-472	7700	0	1	0	0	2	0	0	0	4	0	2	0	0	1	0	0	3	0	1	0	0	0	0	28	28	0	0	0	0	0	0	6	0	2	0	8	0	0	0	0	0	0	0	0	0	0	1	0
CIC/07-477	7800	0	0	0	0	7	0	0	0	2	0	1	0	0	1	0	0	2	0	0	0	0	0	7	32	39	0	0	0	0	0	0	2	0	1	0	6	0	0	0	0	0	0	0	0	0	0	0	0
CIC/07-482	7900	0	2	0	0	0	0	0	0	0	0	0	0	0	2	1	0	3	0	0	0	0	0	5	48	53	0	0	0	0	0	0	2	0	0	0	11	0	0	2	0	0	0	0	0	0	0	0	0
CIC/07-487	8000	0	2	0	0	1	0	0	0	0	0	2	0	0	0	0	0	2	0	0	0	fc	0	4	36	40	0	0	0	0	0	0	2	0	0	0	9	0	0	0	0	0	0	0	0	0	0	0	0
CIC/07-492	8100	0	0	0	0	fc	0	0	3	1	fc	3	0	1	0	0	0	4	0	0	0	0	0	10	91	101	0	0	0	0	0	1	1	0	0	0	5	0	0	3	0	0	0	0	0	0	0	0	0
[truncated: 134 more columns]

## Sheet: n-9mm2
SAMPLE	Height (m)	Chiprhagmalithus spp. (circular)	Discoaster delicatus	Discoaster cf. diastypus	Discoaster diastypus	Discoaster lenticularis	Discoaster lodoensis	Discoaster cf. lodoensis	Discoaster mohleri	Discoaster cf. multiradiatus	Discoaster multiradiatus	Discoaster nobilis gr.	Discoasteroides bramlettei	Discoasteroides bramlettei sensu Perch-Nielsen	Discoasteroides megastypus	D.megastypus/D. delicatus	Ericsonia robusta (<9μm)	Ericsonia robusta (>9μm)	Girgisia gammation (mm2)	Girgisia gammation intergrade(mm2)	Girgisia sp.1 (mm2)	Rhomboaster calcitrapa/ bitrifida	Rhomboaster cuspis	Tribrachiatus bramlettei	Tribrachiatus bramlettei/T. contortus	Tribrachiatus contortus	Tribrachiatus cf. digitalis+ intergrade orthostylus	Tribrachiatus orthostylus
CIC/07-1	9	0	0	0	0	0	0	0	9	0	0	0	0	0	1	0	1	0	0	0	0	0	0	0	0	0	0	0
CIC/07-6	107	0	0	0	0	0	0	0	9	0	0	0	0	0	0	0	1	0	0	0	0	0	0	0	0	0	0	0
CIC/07-11	209.5	0	0	0	0	0	0	0	4	0	0	0	0	0	0	0	0	0	0	0	0	0	0	0	0	0	0	0
CIC/07-12	220	0	0	0	0	0	0	0	4	0	0	1	0	0	0	0	0	0	0	0	0	0	0	0	0	0	0	0
CIC/07-13	248	0	0	0	0	0	0	0	22	0	0	3	0	0	0	0	0	0	0	0	0	0	0	0	0	0	0	0
CIC/07-14	276	0	0	0	0	0	0	0	6	0	0	0	0	0	0	0	0	0	0	0	0	0	0	0	0	0	0	0
CIC/07-15	281	0	0	0	0	0	0	0	2	0	0	0	0	0	0	0	0	0	0	0	0	0	0	0	0	0	0	0
CIC/07-16	326.5	0	0	0	0	0	0	0	8	0	0	2	0	0	0	0	0	0	0	0	0	0	0	0	0	0	0	0
CIC/07-18	351	0	0	0	0	0	0	0	4	0	0	1	0	0	0	0	0	0	0	0	0	0	0	0	0	0	0	0
CIC/07-20	365.5	0	0	0	0	0	0	0	0	0	0	1	0	0	0	0	1	0	0	0	0	0	0	0	0	0	0	0
CIC/07-21	371	0	0	0	0	0	0	0	2	0	0	0	0	0	0	0	0	1	0	0	0	0	0	0	0	0	0	0
CIC/07-22	375	0	0	0	0	0	0	0	5	0	0	0	0	0	0	0	0	0	0	0	0	0	0	0	0	0	0	0
CIC/07-23	390.5	0	0	0	0	0	0	0	1	0	0	0	0	0	0	0	0	0	0	0	0	0	0	0	0	0	0	0
CIC/07-24	404.5	0	0	0	0	0	0	0	7	0	0	1	0	0	0	0	0	1	0	0	0	0	0	0	0	0	0	0
CIC/07-27	511	0	cf	0	0	0	0	0	5	0	0	2	0	0	0	0	0	4	0	0	0	0	0	0	0	0	0	0
CIC/07-28	541	0	0	0	0	0	0	0	3	0	0	0	0	3	0	0	3	3	0	0	0	0	0	0	0	0	0	0
CIC/07-29	563	0	0	0	0	0	0	0	2	0	0	1	3	3	0	0	15	1	0	0	0	0	0	0	0	0	0	0
CIC/07-30	584	0	0	0	0	0	0	0	3	0	0	1	3	6	cf	0	6	2	0	0	0	0	0	0	0	0	0	0
CIC/07-31	598	0	0	0	0	0	0	0	0	0	0	1	7	5	cf	0	0	2	0	0	0	0	0	0	0	0	0	0
CIC/07-32	614	0	0	0	0	0	0	0	1	0	0	0	5	0	3	0	0	1	0	0	0	0	0	0	0	0	0	0
CIC/07-33	636	0	0	0	0	0	0	0	2	0	0	0	5	1	1	0	0	0	0	0	0	0	0	0	0	0	0	0
CIC/07-34	655	0	0	0	0	0	0	0	1	0	0	1	2	0	6	0	0	1	0	0	0	0	0	0	0	0	0	0
CIC/07-35	674	0	0	0	0	0	0	0	1	0	0	1	0	5	12	2	0	1	0	0	0	0	0	0	0	0	0	0
CIC/07-36	698	0	1	0	0	0	0	0	2	0	0	1	1	3	14	0	0	3	0	0	0	0	0	0	0	0	0	0
CIC/07-37	715	0	2	0	0	0	0	0	3	0	0	1	5	1	10	0	1	1	0	0	0	0	0	0	0	0	0	0
CIC/07-38	743	0	3	0	0	0	0	0	6	0	0	0	1	1	5	2	0	2	0	0	0	0	0	0	0	0	0	0
CIC/07-39	765	0	6	0	0	0	0	0	1	0	0	0	1	3	1	1	0	2	0	0	0	0	0	0	0	0	0	0
CIC/07-40	778	0	18	0	0	1	0	0	6	0	0	1	0	0	2	5	0	3	0	0	0	0	0	0	0	0	0	0
CIC/07-41	807	0	0	0	0	0	0	0	1	0	0	0	2	0	1	0	0	1	0	0	0	0	0	0	0	0	0	0
CIC/07-42	813	0	5	0	0	0	0	0	2	1	0	1	1	0	0	0	0	6	0	0	0	0	0	0	0	0	0	0
CIC/07-43	833	0	2	0	0	cf	0	0	1	0	0	0	1	0	0	1	0	7	0	0	0	0	0	0	0	0	0	0
CIC/07-44	851	0	2	0	0	0	0	0	0	0	0	0	0	2	0	0	0	6	0	0	0	0	0	0	0	0	0	0
CIC/07-45	875	0	4	0	0	1	0	0	4	0	0	0	6	3	0	3	0	13	0	0	0	0	0	0	0	0	0	0
CIC/07-46	887	0	0	0	0	0	0	0	7	0	0	0	1	0	1	1	0	4	0	0	0	0	0	0	0	0	0	0
CIC/07-47	911	0	5	0	0	0	0	0	8	1	0	1	6	1	1	0	0	5	0	0	0	0	0	0	0	0	0	0
CIC/07-48	933	0	3	0	0	1	0	0	3	0	0	0	0	0	0	0	0	2	0	0	0	0	0	0	0	0	0	0
CIC/07-49	948	0	2	0	0	5	0	0	3	0	0	1	2	1	1	0	0	3	0	0	0	0	0	0	0	0	0	0
CIC/07-50	970	0	5	0	0	2	0	0	5	0	0	0	4	0	1	2	0	3	0	0	0	0	0	0	0	0	0	0
CIC/07-51	981	0	2	0	0	1	0	0	3	0	0	0	1	0	0	1	0	0	0	0	0	0	0	0	0	0	0	0
CIC/07-52	1001	0	13	0	0	1	0	0	9	2	2	0	1	0	0	0	0	2	0	0	0	0	0	0	0	0	0	0
CIC/07-58	1100	0	10	0	0	3	0	0	11	3	15	1	0	1	0	0	0	1	0	0	0	0	0	0	0	0	0	0
CIC/07-65	1215	0	12	0	0	7	0	0	9	0	48	1	1	1	3	0	0	0	0	0	0	0	0	0	0	0	0	0
CIC/07-71	1300	0	8	0	0	6	0	0	9	0	45	5	1	0	0	0	0	0	0	0	0	0	0	0	0	0	0	0
CIC/07-77	1410	0	5	0	0	7	0	0	7	0	33	3	0	0	0	0	0	0	0	0	0	0	0	0	0	0	0	0
CIC/07-79	1452	0	0	0	0	0	0	0	2	0	51	0	0	0	1	0	0	0	0	0	0	0	0	0	0	0	0	0
CIC/07-82	1492	0	22	0	0	25	0	0	11	0	127	6	0	0	0	0	0	0	0	0	0	0	0	0	0	0	0	0
CIC/07-88	1598	0	1	0	0	3	0	0	5	0	50	2	0	0	0	0	0	0	0	0	0	0	0	0	0	0	0	0
CIC/07-94	1695	0	0	0	0	13	0	0	5	0	49	5	0	0	0	0	0	0	0	0	0	0	0	0	0	0	0	0
CIC/07-99	1800	0	5	0	0	6	0	0	3	1	32	2	0	0	1	0	0	0	0	0	0	0	0	0	0	0	0	0
CIC/07-105	1852	0	4	0	0	6	0	0	15	0	25	6	0	0	0	0	0	0	0	0	0	0	0	0	0	0	0	0
CIC/07-108	1900	0	6	0	0	8	0	0	6	0	72	6	1	0	1	0	0	0	0	0	0	0	0	0	0	0	0	0
CIC/07-113	2000	0	0	0	0	5	0	0	4	0	43	0	0	0	0	0	0	0	0	0	0	0	0	0	0	0	0	0
CIC/07-122	2099	0	3	0	0	4	0	0	3	0	36	1	0	0	0	0	0	0	0	0	0	0	0	0	0	0	0	0
CIC/07-127	2200	0	5	0	0	9	0	0	4	0	73	5	0	0	0	0	0	0	0	0	0	0	0	0	0	0	0	0
CIC/07-133	2300	0	5	0	0	4	0	0	1	0	36	1	0	0	0	0	0	0	0	0	0	0	0	0	0	0	0	0
CIC/07-138	2400	0	4	0	0	3	0	0	1	0	17	6	0	0	0	0	0	0	0	0	0	0	0	0	0	0	0	0
CIC/07-143	2500	0	8	0	0	7	0	0	1	0	34	11	0	0	0	0	0	0	0	0	0	0	0	0	0	0	0	0
CIC/07-148	2600	0	3	0	0	6	0	0	2	0	27	4	0	0	0	0	0	0	0	0	0	0	0	0	0	0	0	0
CIC/07-153	2700	0	2	0	0	3	0	0	1	0	42	5	0	0	0	0	0	0	0	0	0	0	0	0	0	0	0	0
CIC/07-158	2800	0	6	0	0	11	0	0	2	0	66	5	0	0	0	0	0	0	0	0	0	0	0	0	0	0	0	0
CIC/07-162	2870	0	1	0	0	3	0	0	1	0	13	5	0	0	0	0	0	0	0	0	0	0	0	0	0	0	0	0
CIC/07-163	2875	0	0	0	0	0	0	0	0	0	0	0	0	0	0	0	0	0	0	0	0	0	0	0	0	0	0	0
CIC/07-164	2880	0	0	0	0	0	0	0	0	0	0	0	0	0	0	0	0	0	0	0	0	0	0	0	0	0	0	0
CIC/07-165	2885	0	0	0	0	0	0	0	0	0	0	0	0	0	0	0	0	0	0	0	0	0	0	0	0	0	0	0
CIC/07-166	2890	0	1	0	0	3	0	0	4	0	41	0	0	0	0	0	0	0	0	0	0	0	2	0	0	0	0	cf
CIC/07-167	2895	0	0	0	0	2	0	0	0	0	9	0	0	0	0	0	0	0	0	0	0	0	0	0	0	0	0	0
CIC/07-168	2900	0	1	0	0	1	0	0	0	0	6	2	0	0	0	0	0	0	0	0	0	0	0	0	0	0	0	0
CIC/07-171	2915	0	3	0	0	3	0	0	10	0	58	9	0	0	0	0	0	0	0	0	0	7	3	0	0	0	0	0
CIC/07-172	2920	0	4	0	0	3	0	0	2	0	26	3	0	0	0	0	0	0	0	0	0	2	1	cf	0	0	0	0
CIC/07-173	2925	0	4	0	0	7	0	1	9	0	63	11	0	0	0	0	0	0	0	0	0	6	0	0	0	0	0	cf
CIC/07-174	2930	0	6	0	0	5	0	0	8	0	53	0	0	1	0	0	0	0	0	0	0	2	1	cf	0	0	0	0
CIC/07-175	2940	0	3	0	0	1	0	0	4	0	28	4	0	0	0	0	0	0	0	0	0	8	3	cf	0	0	0	0
CIC/07-177	2960	0	20	0	0	16	0	0	3	0	79	5	0	0	0	0	0	0	0	0	0	33	30	2	0	0	0	2
CIC/07-179	2980	0	4	0	0	5	0	0	0	0	32	3	0	0	0	0	0	0	0	0	0	5	6	0	0	0	0	0
CIC/07-181	3000	0	0	0	0	5	0	0	3	0	16	1	0	0	0	0	0	0	0	0	0	8	5	5	0	0	0	0
CIC/07-191	3100	0	3	0	0	9	0	0	1	0	83	7	0	0	0	0	0	0	0	0	0	26	11	2	0	0	0	0
CIC/07-198	3170	0	3	0	0	0	0	0	4	0	38	3	0	0	0	0	0	0	0	0	0	1	2	0	0	0	0	0
CIC/07-201	3203	0	5	0	0	4	0	0	4	0	58	25	0	0	0	0	0	0	0	0	0	1	4	0	0	0	0	0
CIC/07-211	3300	0	1	0	0	2	0	0	0	0	2	1	0	0	0	0	0	0	0	0	0	0	0	0	0	0	0	0
CIC/07-222	3403	0	2	0	0	6	0	0	6	0	31	5	0	0	0	0	0	0	0	0	0	0	0	0	0	0	0	0
CIC/07-228	3502	0	5	0	0	0	0	0	2	0	29	5	0	0	0	0	0	0	0	0	0	0	0	0	0	0	0	0
CIC/07-238	3613	0	2	0	0	3	0	0	3	0	37	5	0	0	0	0	0	0	0	0	0	0	0	1	1	0	0	0
CIC/07-247	3709	0	0	0	0	10	0	0	9	0	64	15	0	0	0	0	0	0	0	0	0	0	0	3	2	0	0	0
CIC/07-257	3802	0	5	0	0	15	0	0	6	0	75	18	0	0	0	0	0	0	0	0	0	0	0	4	0	0	0	0
CIC/07-269	3903	0	2	0	0	14	0	0	0	1	52	12	0	0	0	0	0	0	0	0	0	0	0	0	0	0	1cf	0
CIC/07-277	4000	0	0	0	0	2	0	0	2	0	10	3	0	0	0	0	0	0	0	0	0	0	0	1	0	0	0	0
CIC/07-282	4100	0	0	0	0	0	0	0	0	0	11	0	0	0	0	0	0	0	0	0	0	0	0	2	1	0	0	0
CIC/07-288	4200	0	0	0	0	0	0	0	0	0	8	1	0	0	0	0	0	0	0	0	0	0	0	2	0	0	0	0
CIC/07-289	4220	0	1	0	0	3	0	0	4	0	13	3	0	0	0	0	0	0	0	0	0	0	0	6	0	0	0	0
CIC/07-290	4240	0	2	1	0	1	0	0	0	0	4	2	0	0	0	0	0	0	0	0	0	0	0	1	0	0	0	0
CIC/07-291	4260	0	0	0	0	1	0	0	2	0	2	1	0	0	0	0	0	0	0	0	0	0	0	1	0	0	0	0
CIC/07-292	4280	0	1	2	1	1	0	0	2	0	17	3	0	0	0	0	0	0	0	0	0	0	0	2	0	0	0	0
CIC/07-293	4300	0	0	0	1	0	0	0	0	0	17	0	0	0	0	0	0	0	0	0	0	0	0	5	1	0	0	0
CIC/07-299	4400	0	0	2	2	7	0	0	cf	0	14	4	0	0	0	0	0	0	0	0	0	0	0	2	7	0	0	0
CIC/07-304	4500	0	0	0	7	7	0	0	1	0	8	5	0	0	0	0	0	0	0	0	0	0		7	7	3	0	0
CIC/07-309	4600	0	0	3	5	3	0	0	0	0	3	2	0	0	0	0	0	0	0	0	0	0	0	2	1	1	5	0
CIC/07-314	4700	0	0	0	11	10	0	0	0	0	5	1	0	0	0	0	0	0	0	0	0	0	0	3	1	2	0	0
CIC/07-319	4800	0	0	0	21	5	0	0	0	0	3	0	0	0	0	0	0	0	0	0	0	0	0	1	2	1	0	0
CIC/07-324	4900	0	0	0	4	7	0	0	0	0	7	2	0	0	0	0	0	0	0	0	0	0	0	0	0	0	0	0
CIC/07-329	5000	0	0	0	18	1	0	0	0	0	5	0	0	0	0	0	0	0	0	0	0	0	0	0	0	6	0	0
CIC/07-334	5100	0	0	0	25	0	0	0	0	0	1	2	0	0	0	0	0	0	0	0	0	0	0	0	0	4	0	0
CIC/07-335	5120	0	0	0	27	0	0	0	1	1	0	0	0	0	0	0	0	0	0	0	0	0	0	0	0	6	0	0
CIC/07-336	5140	0	0	0	13	0	0	0	cf	0	1	3	0	0	0	0	0	0	0	0	0	0	0	0	0	5	1	2
CIC/07-337	5160	0	0	0	6	0	0	0	0	0	0	1	0	0	0	0	0	0	0	0	0	0	cf	0	0	6	3	3
CIC/07-338	5180	0	0	0	2	0	0	0	0	0	0	0	0	0	0	0	0	0	0	0	0	0	0	0	0	1	0	1
CIC/07-339	5200	0	0	0	12	1	0	0	0	0	0	1	0	0	0	0	0	0	0	0	0	0	0	0	0	5	3	4
CIC/07-340	5220	0	0	0	23	0	0	0	1	1	0	3	0	0	0	0	0	0	0	0	0	0	0	0	0	2	1	5
CIC/07-341	5240	0	0	0	12	0	0	0	cf	0	0	1	0	0	0	0	0	0	0	0	0	0	0	0	0	0	1	4
CIC/07-342	5260	0	0	0	4	0	0	0	0	0	0	0	0	0	0	0	0	0	0	0	0	0	0	0	0	1	2	3
CIC/07-343	5280	0	0	0	5	0	0	0	0	0	0	0	0	0	0	0	0	0	0	0	0	0	0	0	0	0	1	5
CIC/07-344	5300	0	0	0	29	1	0	0	0	0	0	3	0	0	0	0	0	0	0	0	0	0	0	0	0	0	1	10
CIC/07-350	5390	0	0	0	15	0	0	0	0	0	0	2	0	0	0	0	0	0	0	0	0	0	0	0	0	0	0	11
CIC/07-349	5400	0	0	1	27	6	0	0	0	0	0	5	0	0	0	0	0	0	0	0	0	0	0	0	0	0	0	6
CIC/07-351	5410	0	0	0	14	0	0	0	2	0	0	4	0	0	0	0	0	0	0	0	0	0	0	0	0	0	0	10
CIC/07-352	5420	0	0	0	8	0	0	0	1	0	0	0	0	0	0	0	0	0	0	0	0	0	0	0	0	0	0	7
CIC/07-353	5430	0	3	0	33	0	0	0	0	0	0	4	0	0	0	0	0	0	0	0	0	0	0	0	0	0	0	50
CIC/07-354	5440	0	0	0	38	0	0	0	3	1	0	7	0	0	0	0	0	0	0	0	0	0	0	0	0	0	0	79
CIC/07-355	5450	0	6	0	33	0	0	0	0	0	0	10	0	0	0	0	0	0	0	0	0	0	0	0	0	0	0	37
CIC/07-356	5460	0	0	0	20	3	0	0	4	0	0	4	0	0	0	0	0	0	0	0	0	0	0	0	0	0	0	17
CIC/07-357	5470	0	0	0	31	0	0	0	1	1	0	1	0	0	0	0	0	0	0	0	0	0	0	0	0	0	0	24
CIC/07-358	5480	0	0	1	18	0	cf	0	0	0	0	4	0	0	0	0	0	0	0	0	0	0	0	0	0	0	0	7
CIC/07-359	5490	0	0	0	12	0	0	0	0	2	0	0	0	0	0	0	0	0	0	0	0	0	0	0	0	0	0	11
CIC/07-361	5510	0	0	0	20	0	0	0	2	0	3	2	0	0	0	0	0	0	0	0	0	0	0	0	0	0	0	10
CIC/07-364	5550	0	0	0	9	0	0	0	4	0	0	0	0	0	0	0	0	0	0	0	0	0	0	0	0	0	0	6
CIC/07-365	5570	0	0	2	16	0	0	0	3	0	1	0	0	0	0	0	0	0	0	0	0	0	0	0	0	0	0	9
CIC/07-366	5590	0	0	0	1	16	0	0	0	1	1	0	0	0	0	0	0	0	0	0	0	0	0	0	0	0	0	33
CIC/07-367	5610	0	0	0	46	0	0	0	0	7	0	1	0	0	0	0	0	0	0	0	0	0	0	0	0	0	0	34
CIC/07-368	5630	0	0	2	1	0	0	0	0	1	0	0	0	0	0	0	0	0	0	0	0	0	0	0	0	0	0	5
CIC/07-369	5650	0	0	2	38	0	0	0	0	0	4	0	0	0	0	0	0	0	0	0	0	0	0	0	0	0	0	20
CIC/07-370	5670	0	0	0	2	0	0	0	0	0	0	0	0	0	0	0	0	0	0	0	0	0	0	0	0	0	0	2
CIC/07-372	5710	0	0	0	19	0	0	0	0	7	0	1	0	0	0	0	0	0	0	0	0	0	0	0	0	0	0	15
CIC/07-377	5810	0	0	0	8	0	0	0	0	0	9	1	0	0	0	0	0	0	0	0	0	0	0	0	0	0	0	5
CIC/07-382	5910	0	0	0	2	0	0	0	0	0	5	0	0	0	0	0	0	0	0	0	0	0	0	0	0	0	0	1
CIC/07-387	6010	0	0	4	9	0	1	0	0	0	5	0	0	0	0	0	0	0	0	0	0	0	0	0	0	0	0	21
CIC/07-388	6030	0	0	0	5	0	0	0	0	0	0	0	0	0	0	0	0	0	0	2	0	0	0	0	0	0	0	2
CIC/07-389	6050	0	0	0	48	0	5	3	0	0	0	0	0	0	0	0	0	0	0	4	0	0	0	1	0	0	0	50
CIC/07-390	6070	0	0	0	16	0	2	0	0	0	0	1	0	0	0	0	0	0	0	0	0	0	0	0	0	0	0	8
CIC/07-391	6090	0	0	0	4	1	5	0	0	0	1	0	0	0	0	0	0	0	0	4	0	0	0	0	0	0	0	19
CIC/07-392	6110	0	0	0	14	0	3	0	0	0	0	0	0	0	0	0	0	0	0	0	0	0	0	0	0	0	0	14
CIC/07-393	6130	0	0	1	15	0	2	1	0	1	0	0	0	0	0	0	0	0	2	0	1	0	0	0	0	0	0	11
CIC/07-394	6150	0	0	0	4	0	2	2	0	0	0	0	0	0	0	0	0	0	0	0	0	0	0	0	0	0	0	0
CIC/07-395	6170	0	0	0	15	0	1	1	0	0	0	0	0	0	0	0	0	0	4	0	0	0	0	0	0	0	0	0
CIC/07-397	6210	0	0	0	9	0	1	0	0	0	0	0	0	0	0	0	0	0	0	2	0	0	0	0	0	0	0	32
CIC/07-402	6310	0	0	0	6	0	0	0	0	0	0	0	0	0	0	0	0	0	10	0	0	0	0	0	0	0	0	3
CIC/07-407	6400	0	0	1	3	0	1	0	0	0	0	0	0	0	0	0	0	0	13	0	0	0	0	0	0	0	0	5
CIC/07-412	6500	0	0	0	1	0	0	0	1	0	0	0	0	0	0	0	0	0	10	0	0	0	0	0	0	0	0	5
CIC/07-417	6600	0	0	0	10	0	0	0	0	0	0	1	0	0	0	0	0	0	14	0	0	0	0	0	0	0	0	3
CIC/07-422	6700	1	0	0	2	0	0	0	1	0	0	0	0	0	0	0	0	0	15	0	0	0	0	0	0	0	0	4
CIC/07-427	6800	2	0	0	2	0	0	0	0	0	0	0	0	0	0	0	0	0	19	0	0	0	0	0	0	0	0	4
CIC/07-432	6900	0	0	0	0	0	0	0	1	0	0	0	0	0	0	0	0	0	18	0	0	0	0	0	0	0	0	1
CIC/07-437	7000	cf	0	0	5	0	0	1	0	1	0	0	0	0	0	0	0	0	19	0	0	0	0	0	0	0	0	13
CIC/07-442	7100	1	0	0	0	0	0	0	0	0	0	0	0	0	0	0	0	0	16	0	0	0	0	0	0	0	0	2
CIC/07-443	7120	6	0	8-9 rayed	1	0	2	0	0	0	0	0	0	0	0	0	0	0	7	0	1	0	0	0	0	0	0	40
CIC/07-444	7140	5	0	8-9 rayed	0	0	0	0	0	0	0	0	0	0	0	0	0	0	12	0	1	0	0	0	0	0	0	5
CIC/07-445	7160	2	0	cf	0	0	0	0	0	0	0	0	0	0	0	0	0	0	6	0	1	0	0	0	0	0	0	7
CIC/07-446	7180	6	0	0	2	0	0	0	0	0	0	0	0	0	0	0	0	0	16	0	1	0	0	0	0	0	0	5
CIC/07-447	7200	6	0	0	3	0	1	0	1	0	0	2	0	0	0	0	0	0	6	0	0	0	0	0	0	0	0	13
CIC/07-448	7220	7	0	9 rayed	1	0	1	0	0	0	0	0	0	0	0	0	0	0	18	0	3	0	0	0	0	0	0	2
CIC/07-449	7240	5	0	0	4	0	1	1	0	0	0	0	0	0	0	0	0	0	12	0	1	0	0	0	0	0	0	10
CIC/07-450	7260	1	0	0	0	0	2	1	0	0	0	0	0	0	0	0	0	0	1	0	2	0	0	0	0	0	0	3
CIC/07-451	7279	1	0	1	2	0	0	0	0	0	0	0	0	0	0	0	0	0	0	0	0	0	0	0	0	0	0	3
CIC/07-451bis	7280	4	0	0	1	0	5	2	0	0	0	0	0	0	0	0	0	0	1	0	4	0	0	0	0	0	0	6
CIC/07-452	7300	4	0	malf	1	0	10	7	0	0	0	0	0	0	0	0	0	0	5	0	1	0	0	0	0	0	0	16
CIC/07-453	7320	0	0	0	0	0	0	0	0	0	0	0	0	0	0	0	0	0	1	0	3	0	0	0	0	0	0	1
CIC/07-454	7340	cf	0	0	0	0	0	0	0	0	0	0	0	0	0	0	0	0	2	0	0	0	0	0	0	0	0	13
CIC/07-455	7360	4	0	1	5	0	0	0	0	0	0	0	0	0	0	0	0	0	3	0	0	0	0	0	0	0	0	16
CIC/07-456	7380	3	0	0	0	0	0	0	0	0	0	0	0	0	0	0	0	0	1	0	0	0	0	0	0	0	0	6
CIC/07-457	7400	0	0	0	0	0	0	0	0	0	0	0	0	0	0	0	0	0	3	0	0	0	0	0	0	0	0	7
CIC/07-458	7420	10	0	1	1	0	0	0	0	0	0	0	0	0	0	0	0	0	4	0	2	0	0	0	0	0	0	12
CIC/07-459	7440	3	0	0	4	0	2	1	0	0	0	0	0	0	0	0	0	0	16	0	1	0	0	0	0	0	1	10
CIC/07-460	7460	6	0	2	1	0	1	0	0	0	0	0	0	0	0	0	0	0	2	0	1	0	0	0	0	0	0	11
CIC/07-461	7480	0	0	0	0	0	0	0	0	0	0	0	0	0	0	0	0	0	2	0	0	0	0	0	0	0	0	1
CIC/07-462	7500	5	0	0	7	0	0	3	0	0	0	0	0	0	0	0	0	0	4	0	0	0	0	0	0	0	0	19
CIC/07-463	7520	0	0	9 rayed	1	0	0	0	0	0	0	0	0	0	0	0	0	0	0	0	0	0	0	0	0	0	0	1
CIC/07-464	7540	0	0	0	1	0	0	0	0	0	0	0	0	0	0	0	0	0	2	0	2	0	0	0	0	0	0	2
CIC/07-465	7560	0	0	0	0	0	0	0	0	0	0	0	0	0	0	0	0	0	2	0	0	0	0	0	0	0	0	0
CIC/07-466	7580	0	0	0	3	0	0	8rayed	0	0	0	0	0	0	0	0	0	0	1	0	0	0	0	0	0	0	0	2
CIC/07-467	7600	3	0	0	0	0	0	0	0	0	0	0	0	0	0	0	0	0	3	0	0	0	0	0	0	0	0	3
CIC/07-472	7700	7	0	0	9	0	2	0	0	0	0	0	0	0	0	0	0	0	0	0	0	0	1	0	0	0	0	14
CIC/07-477	7800	0	0	0	7	0	5	0	3	0	0	0	0	0	0	0	0	0	4	0	0	0	0	0	0	0	0	9
CIC/07-482	7900	0	0	0	0	0	7	0	0	0	0	0	0	0	0	0	0	0	3	0	0	0	0	0	0	0	0	6
CIC/07-487	8000	0	0	0	cf	0	1	0	0	0	0	0	0	0	0	0	0	0	7	0	0	0	0	0	0	0	0	3
CIC/07-492	8100	0	0	0	cf	0	9	0	0	0	0	0	0	0	0	0	0	0	1	0	0	0	0	0	0	0	0	24
