# Supplementary material for: Stable isotope and calcareous nannofossil assemblage record of the late Paleocene and early Eocene (Cicogna section)
Source: Copernicus journal article supplement (doi:10.5194/cp-12-883-2016), 2016-04-11
Supplement: Supplementary file [file cp-12-883-2016-supplement-title-page.pdf › cp-12-883-2016-supplement-title-page.pdf]

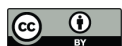

## *Supplement of*

# **Stable isotope and calcareous nannofossil assemblage record of the late Paleocene and early Eocene (Cicogna section)**

**Claudia Agnini et al.**

*Correspondence to:* Claudia Agnini ([claudia.agnini@unipd.it](mailto:claudia.agnini@unipd.it))

- [cp-12-883-2016-supplement-title-page.pdf](#)
- [20160314\\_READ ME\\_Supplementary tables.docx](#)
- [20160314\\_TableS01\\_isotopes-carbonate.xlsx](#)
- [20160314\\_TableS02\\_nannos.xls](#)
- [20160314\\_TableS03\\_PCA](#)
- [20160314\\_TableS04\\_nm-MDS](#)
- [20160407\\_SupplementaryInfo.pdf](#)

The copyright of individual parts of the supplement might differ from the CC-BY 3.0 licence.
